# Supplementary material
Source: publisher figshare collection journal article supplement (https://gsajournals.figshare.com/ndownloader/files/26842979)
Supplement: Supplementary file 1 [file 26842979]

Exp_Year_Code,Experiment,Year,Latitude,Longitude,Soil.Type..From.websoilsurvey.,Sand,Silt,Clay,MeanLowTemp_1,MeanLowTemp_2,MeanLowTemp_3,MeanLowTemp_4,MeanLowTemp_5,MeanLowTemp_6,MeanLowTemp_7,MeanLowTemp_8,MeanLowTemp_9,MeanLowTemp_10,MeanLowTemp_11,MeanLowTemp_12,MeanLowTemp_13,MeanLowTemp_14,MeanLowTemp_15,MeanLowTemp_16,MeanLowTemp_17,MeanLowTemp_18,MeanLowTemp_19,MeanLowTemp_20,MeanLowTemp_21,MeanLowTemp_22,MeanLowTemp_23,MeanLowTemp_24,MeanLowTemp_25,MeanLowTemp_26,MeanLowTemp_27,MeanLowTemp_28,MeanLowTemp_29,MeanLowTemp_30,MeanTemp_1,MeanTemp_2,MeanTemp_3,MeanTemp_4,MeanTemp_5,MeanTemp_6,MeanTemp_7,MeanTemp_8,MeanTemp_9,MeanTemp_10,MeanTemp_11,MeanTemp_12,MeanTemp_13,MeanTemp_14,MeanTemp_15,MeanTemp_16,MeanTemp_17,MeanTemp_18,MeanTemp_19,MeanTemp_20,MeanTemp_21,MeanTemp_22,MeanTemp_23,MeanTemp_24,MeanTemp_25,MeanTemp_26,MeanTemp_27,MeanTemp_28,MeanTemp_29,MeanTemp_30,MeanHighTemp_1,MeanHighTemp_2,MeanHighTemp_3,MeanHighTemp_4,MeanHighTemp_5,MeanHighTemp_6,MeanHighTemp_7,MeanHighTemp_8,MeanHighTemp_9,MeanHighTemp_10,MeanHighTemp_11,MeanHighTemp_12,MeanHighTemp_13,MeanHighTemp_14,MeanHighTemp_15,MeanHighTemp_16,MeanHighTemp_17,MeanHighTemp_18,MeanHighTemp_19,MeanHighTemp_20,MeanHighTemp_21,MeanHighTemp_22,MeanHighTemp_23,MeanHighTemp_24,MeanHighTemp_25,MeanHighTemp_26,MeanHighTemp_27,MeanHighTemp_28,MeanHighTemp_29,MeanHighTemp_30,MeanDewPoint_1,MeanDewPoint_2,MeanDewPoint_3,MeanDewPoint_4,MeanDewPoint_5,MeanDewPoint_6,MeanDewPoint_7,MeanDewPoint_8,MeanDewPoint_9,MeanDewPoint_10,MeanDewPoint_11,MeanDewPoint_12,MeanDewPoint_13,MeanDewPoint_14,MeanDewPoint_15,MeanDewPoint_16,MeanDewPoint_17,MeanDewPoint_18,MeanDewPoint_19,MeanDewPoint_20,MeanDewPoint_21,MeanDewPoint_22,MeanDewPoint_23,MeanDewPoint_24,MeanDewPoint_25,MeanDewPoint_26,MeanDewPoint_27,MeanDewPoint_28,MeanDewPoint_29,MeanDewPoint_30,MeanHumid_1,MeanHumid_2,MeanHumid_3,MeanHumid_4,MeanHumid_5,MeanHumid_6,MeanHumid_7,MeanHumid_8,MeanHumid_9,MeanHumid_10,MeanHumid_11,MeanHumid_12,MeanHumid_13,MeanHumid_14,MeanHumid_15,MeanHumid_16,MeanHumid_17,MeanHumid_18,MeanHumid_19,MeanHumid_20,MeanHumid_21,MeanHumid_22,MeanHumid_23,MeanHumid_24,MeanHumid_25,MeanHumid_26,MeanHumid_27,MeanHumid_28,MeanHumid_29,MeanHumid_30,MeanSol_1,MeanSol_2,MeanSol_3,MeanSol_4,MeanSol_5,MeanSol_6,MeanSol_7,MeanSol_8,MeanSol_9,MeanSol_10,MeanSol_11,MeanSol_12,MeanSol_13,MeanSol_14,MeanSol_15,MeanSol_16,MeanSol_17,MeanSol_18,MeanSol_19,MeanSol_20,MeanSol_21,MeanSol_22,MeanSol_23,MeanSol_24,MeanSol_25,MeanSol_26,MeanSol_27,MeanSol_28,MeanSol_29,MeanSol_30,MeanRain_1,MeanRain_2,MeanRain_3,MeanRain_4,MeanRain_5,MeanRain_6,MeanRain_7,MeanRain_8,MeanRain_9,MeanRain_10,MeanRain_11,MeanRain_12,MeanRain_13,MeanRain_14,MeanRain_15,MeanRain_16,MeanRain_17,MeanRain_18,MeanRain_19,MeanRain_20,MeanRain_21,MeanRain_22,MeanRain_23,MeanRain_24,MeanRain_25,MeanRain_26,MeanRain_27,MeanRain_28,MeanRain_29,MeanRain_30,MeanWind_1,MeanWind_2,MeanWind_3,MeanWind_4,MeanWind_5,MeanWind_6,MeanWind_7,MeanWind_8,MeanWind_9,MeanWind_10,MeanWind_11,MeanWind_12,MeanWind_13,MeanWind_14,MeanWind_15,MeanWind_16,MeanWind_17,MeanWind_18,MeanWind_19,MeanWind_20,MeanWind_21,MeanWind_22,MeanWind_23,MeanWind_24,MeanWind_25,MeanWind_26,MeanWind_27,MeanWind_28,MeanWind_29,MeanWind_30,RainAccum_1,RainAccum_2,RainAccum_3,RainAccum_4,RainAccum_5,RainAccum_6,RainAccum_7,RainAccum_8,RainAccum_9,RainAccum_10,RainAccum_11,RainAccum_12,RainAccum_13,RainAccum_14,RainAccum_15,RainAccum_16,RainAccum_17,RainAccum_18,RainAccum_19,RainAccum_20,RainAccum_21,RainAccum_22,RainAccum_23,RainAccum_24,RainAccum_25,RainAccum_26,RainAccum_27,RainAccum_28,RainAccum_29,RainAccum_30,PercentDaysWithRain_1,PercentDaysWithRain_2,PercentDaysWithRain_3,PercentDaysWithRain_4,PercentDaysWithRain_5,PercentDaysWithRain_6,PercentDaysWithRain_7,PercentDaysWithRain_8,PercentDaysWithRain_9,PercentDaysWithRain_10,PercentDaysWithRain_11,PercentDaysWithRain_12,PercentDaysWithRain_13,PercentDaysWithRain_14,PercentDaysWithRain_15,PercentDaysWithRain_16,PercentDaysWithRain_17,PercentDaysWithRain_18,PercentDaysWithRain_19,PercentDaysWithRain_20,PercentDaysWithRain_21,PercentDaysWithRain_22,PercentDaysWithRain_23,PercentDaysWithRain_24,PercentDaysWithRain_25,PercentDaysWithRain_26,PercentDaysWithRain_27,PercentDaysWithRain_28,PercentDaysWithRain_29,PercentDaysWithRain_30,GDD_1,GDD_2,GDD_3,GDD_4,GDD_5,GDD_6,GDD_7,GDD_8,GDD_9,GDD_10,GDD_11,GDD_12,GDD_13,GDD_14,GDD_15,GDD_16,GDD_17,GDD_18,GDD_19,GDD_20,GDD_21,GDD_22,GDD_23,GDD_24,GDD_25,GDD_26,GDD_27,GDD_28,GDD_29,GDD_30,MeanPhoto_1,MeanPhoto_2,MeanPhoto_3,MeanPhoto_4,MeanPhoto_5,MeanPhoto_6,MeanPhoto_7,MeanPhoto_8,MeanPhoto_9,MeanPhoto_10,MeanPhoto_11,MeanPhoto_12,MeanPhoto_13,MeanPhoto_14,MeanPhoto_15,MeanPhoto_16,MeanPhoto_17,MeanPhoto_18,MeanPhoto_19,MeanPhoto_20,MeanPhoto_21,MeanPhoto_22,MeanPhoto_23,MeanPhoto_24,MeanPhoto_25,MeanPhoto_26,MeanPhoto_27,MeanPhoto_28,MeanPhoto_29,MeanPhoto_30,MeanGHI_1,MeanGHI_2,MeanGHI_3,MeanGHI_4,MeanGHI_5,MeanGHI_6,MeanGHI_7,MeanGHI_8,MeanGHI_9,MeanGHI_10,MeanGHI_11,MeanGHI_12,MeanGHI_13,MeanGHI_14,MeanGHI_15,MeanGHI_16,MeanGHI_17,MeanGHI_18,MeanGHI_19,MeanGHI_20,MeanGHI_21,MeanGHI_22,MeanGHI_23,MeanGHI_24,MeanGHI_25,MeanGHI_26,MeanGHI_27,MeanGHI_28,MeanGHI_29,MeanGHI_30,MeanPeakGHI_1,MeanPeakGHI_2,MeanPeakGHI_3,MeanPeakGHI_4,MeanPeakGHI_5,MeanPeakGHI_6,MeanPeakGHI_7,MeanPeakGHI_8,MeanPeakGHI_9,MeanPeakGHI_10,MeanPeakGHI_11,MeanPeakGHI_12,MeanPeakGHI_13,MeanPeakGHI_14,MeanPeakGHI_15,MeanPeakGHI_16,MeanPeakGHI_17,MeanPeakGHI_18,MeanPeakGHI_19,MeanPeakGHI_20,MeanPeakGHI_21,MeanPeakGHI_22,MeanPeakGHI_23,MeanPeakGHI_24,MeanPeakGHI_25,MeanPeakGHI_26,MeanPeakGHI_27,MeanPeakGHI_28,MeanPeakGHI_29,MeanPeakGHI_30
DEH1_2014,DEH1,2014,38.637405,-75.204048,100% Loamy Sand,81.87,12.58,5.548,12.33351852,11.16060293,9.766,13.978,14.454,11.856,15.4,19.646,17.6,15.154,15.944,18.956,17.744,19.666,17.078,17.812,16.768,16.166,16.864,16,11.29482221,17.456,14.044,17.822,19.41,17.19,11.332,11.898,10.59,11.725,17.87299769,20.08863756,16.41308333,19.50054167,19.44808333,19.958625,21.84029167,22.980375,24.92245833,21.896875,23.22883333,26.09054167,24.6155,24.66316667,22.87275,23.21258333,22.56958334,21.315875,22.948625,22.436375,21.29564213,22.65416667,21.45045833,24.52254167,25.17775,22.03675,18.03141667,19.19070833,16.90329167,18.02068911,23.01888889,26.654,21.488,26.09,24.724,27.966,27.754,27.878,31.946,27.988,29.488,32.812,31.132,31.332,29.644,28.822,29,27.334,30.21,29.088,29.182,29.71,29.954,33.044,32.366,27.71,26.312,27.31,23.57,27.47,10.19724537,14.59581131,8.795458333,12.22491667,14.56954167,10.35195833,14.53625,19.46625,17.67708333,14.90529167,17.20825,19.64579167,17.5035,21.160875,18.84025,19.75895833,17.97945833,18.092,18.4925,17.95970833,15.83385976,19.1385,15.91966667,19.15170833,19.89320833,17.60733334,11.96733333,13.46004167,12.83516667,13.78053686,62.17321496,76.01,66.53875,66.61333333,77.03958333,59.8875,67.5975,82.90375,67.67375,70.025,73.50541667,71.06291667,67.68,82.77291667,80.85166667,82.88708333,78.07791667,84.43083333,79.04041667,79.28583333,74.90958333,82.51666666,75.11083333,75.66875,76.06666667,78.48666667,73.95291667,73.51208333,81.01875,82.08060898,184.2638889,271.1291667,258.6333333,286.8,208.55,344.05,305.35,215.3041667,333.9833333,298.3208333,249.5166667,270.7291667,302.2583333,211.6333333,146.8583333,188.9041667,227.5583333,163.6791667,262.8083333,210.5,252.225,189.8916667,263.3166667,231.7125,202,135.3,183.4333333,168.0041667,150.3583334,164.8733974,0.296333333,0.4572,7.9248,0.3048,1.27,2.4892,3.2512,3.2512,2.6416,2.032,1.6764,6.7056,0.508,0.1524,0,0,0,0.1524,0.5588,0.254,0,0.3048,0,0,0.4064,0.1016,0,0,0.762,0,3.12928,3.933952,2.592832,2.771648,4.380992,3.486912,4.112768,4.202176,3.486912,4.02336,4.202176,5.722112,5.185664,5.185664,4.02336,4.380992,3.844544,3.933952,3.039872,3.755136,3.308096,4.649216,3.755136,4.4704,4.4704,5.36448,2.950464,3.397504,4.380992,2.90576,1.778,2.286,39.624,1.524,6.35,12.446,16.256,16.256,13.208,10.16,8.382,33.528,2.54,0.762,0,0,0,0.762,2.794,1.27,0,1.524,0,0,2.032,0.508,0,0,3.81,0,0.333333333,0.2,0.2,0.2,0.6,0.2,0.2,0.6,0.4,0.4,0.4,0.4,0.2,0.2,0,0,0,0.4,1,0.4,0,0.2,0,0,0.2,0.2,0,0,0.4,0,46.05722223,67.58,28.135,50.17,59.415,61.475,65.775,76.67,89.305,65.08,67.635,90.61,81.58,94.635,77.305,77.665,69.14,66.835,91.165,77.805,58.21705552,85.11,81.135,89.97,92.775,67.475,44.11,48.02,35.4,19.195,15.05,15.22666667,15.36666667,15.50333333,15.61333333,15.71,15.78666667,15.84333333,15.87,15.87333333,15.85,15.81333333,15.75,15.67,15.56333333,15.43666667,15.30333333,15.15,14.99333333,14.81333333,14.63666667,14.44666667,14.26,14.05333333,13.86,13.65,13.44666667,13.24,13.03,12.875,234.5486111,277.375,259.1166667,281.0416667,217.9458333,326.5,286.6791667,210.2416667,316.4666667,287.6208333,283.7375,287.5166666,317.2416667,260.2541667,254.3625,241.8625,253.4083333,225.38125,286.4,244.5208333,258.6125,215.8166667,295.4333333,228.3708333,194.2166666,166.2791667,227.4625,183.8666667,167.55,162.6875,825.1666667,878.2,832,935,715.2,991,915.8,751.2,941.8,848.6,906.6,892,941.4,844.2,870.2,812.4,842.8,786,896.4,801.2,852,758.4,914,823,705.8,587.2,811.6,695.2,611,626
GAH1_2014,GAH1,2014,31.506544,-83.555016,100% Loamy Sand,81.87,12.58,5.548,13.55,12.2,8.64,12.54,16.28,14.32,15.46,19.04,12.74,17.82,19.62,20.22,20.24,21.2,19.06,21.24,21.64,22.6,20.12,21.8,20.96,22.48,23.26,20,21.6,22.72,20.82,21.74,21.18,20.98,18.62743056,19.41958333,13.18583333,18.57416667,22.08375,18.37708333,23.61875,24.06541667,19.685,25.37833333,25.69458333,24.51833333,26.24,26.375,26.66166667,26.37833333,26.85166667,28.72458333,27.24375,27.10833333,26.30625,25.70583333,28.18875,25.92958333,27.53791667,27.86791667,27.72791667,27.18,27.52916667,28.17416667,23.13333333,26.5,17.78,25.68,28.24,23.22,31.7,30.88,26.02,32.96,33.22,31,33.34,32.54,34.4,34.94,33.56,36.88,35.22,35.82,33.36,30.9,35.1,34,35.88,35.84,36.14,36.62,36.26,37.3,14.05451168,12.21208333,9.9575,13.93416667,17.31666666,13.84125,15.09958333,19.66333333,13.51333333,17.58125,19.49,18.94416667,20.68458333,20.64375,21.31083333,21.64041667,21.88916667,22.55791667,19.3725,21.69208333,21.04166667,22.66708333,23.29333333,19.34541667,21.37916666,22.54375,19.87708333,22.04333333,19.41916667,20.15083333,77.90555556,68.08416667,82.72375,78.75625,78.06125,79.65208333,64.87375,79.37458333,72.195,66.06833333,72.45916667,73.52666667,74.30791667,73.68,76.1125,78.22416666,77.03291667,73.46416667,66.60791667,76.205,76.59125,85.10916667,77.42916667,71.62541667,74.31041667,76.26916667,67.6975,77.83208333,66.32208333,67.22541667,0,0,0,0,0,0,0,0,0,0,89.5595238,247.1833333,287.7666667,304.025,292.2083333,258.1333333,286.7666667,309.8583333,306.05,293.175,251.7791666,181.55,265.1458333,271.2,250.3875,255.5583333,267.0125,226.6583333,262.4083333,260.5333333,16.2,0,21.5,0,3.34,6.82,5.18,21.18,8.96,0,4.22,0.66,5.44,2.76,5.62,2.84,7.3,0.34,4.58,1.64,5.76,7.92,0.3,0,0.7,0.38,0.4,1.86,0,4.14,2.607733333,1.609344,3.57632,1.430528,1.966976,1.609344,1.609344,1.430528,2.056384,1.966976,1.072896,1.34112,2.056384,2.324608,0.89408,1.519936,2.145792,1.251712,1.698752,1.519936,1.698752,1.34112,2.414016,1.519936,1.34112,1.430528,1.609344,1.519936,1.698752,1.251712,97.2,0,107.5,0,16.7,34.1,25.9,105.9,44.8,0,21.1,3.3,27.2,13.8,28.1,14.2,36.5,1.7,22.9,8.2,28.8,39.6,1.5,0,3.5,1.9,2,9.3,0,20.7,0.666666667,0,0.6,0,0.4,0.4,0.4,0.8,0.2,0,0.2,0.6,0.8,0.4,0.6,0.6,0.6,0.2,0.2,0.4,0.2,0.8,0.2,0,0.6,0.4,0.2,0.4,0,0.4,50.05,46.75,16.05,45.55,83,52.9,100,94.1,46.9,100,100,89.3,100,100,100,100,100,100,100,100,100,91.05,100,100,100,100,100,100,100,100,13.68333333,13.85666667,14.00666667,14.15666667,14.3,14.44,14.56666667,14.69333333,14.8,14.90333333,14.99,15.06333333,15.12666667,15.16333333,15.19333333,15.2,15.18666667,15.16666667,15.11666667,15.05666667,14.98,14.89333333,14.79333333,14.68,14.56,14.42666667,14.29333333,14.15666667,14.00666667,13.86,176.3125,267.5416667,148.9666667,252.4541667,223.2208333,202.6833333,317.4791667,281.5333333,283.7541667,320.6291667,288.6291667,256.8833333,286.8916667,315.9583333,301.4583333,284.4083333,288.5458333,315.6,316.3166667,291.4916667,271.2,214.0416667,291.95,268.55,287.2958333,256.5416667,278.3125,267.7125,277.5708333,251.225,701.1666667,944.6,626.4,883,829.6,749.2,987.4,917.6,890.6,970.2,887,884.6,937.8,966.6,972.2,964.2,960.4,963.2,992.4,948.6,907,745.6,948.4,934.2,935.6,909.8,951,923.4,930.6,896
IAH1c_2014,IAH1c,2014,41.99653,-93.696188,"57.6% Loam, 40.3% Clay Loam, 2.1% Silty Loam",37.87623,38.22423,23.89954,6.388888889,5.489111111,13.188,16.654,17.898,14.978,12.846,16.2,17.822,17.478,13.634,16.178,15.988,11.012,17.41,15.868,12.498,13.86414923,16.334,15.558,19.176,19.566,16.702,14.022,11.068,2.842,10.134,10.554,12.344,4.89,13.7037037,11.73386111,19.75666667,21.67491667,23.370625,19.817,19.61941667,23.27908333,22.76458333,22.34133333,18.71754167,22.25545833,21.819125,18.59420833,24.1865,21.10091667,20.54895833,21.47837811,20.81779167,21.083,23.97058333,23.65866667,21.58470833,20.33066666,15.65654167,10.85333333,17.13791667,16.68383333,17.89725,9.936916668,20.64814815,17.08933333,27.234,27.488,29.522,24.734,25.022,29.176,27.822,27.766,24.454,28.1,27.378,25.01,30.044,26.59,28.624,26.278,25.534,26.59,29.534,29,27.612,27.456,20.422,17.7,24.756,24.29,25.242,15.356,7.87037037,2.325916667,8.985416667,16.08675,16.08758333,15.31904167,8.956291665,16.526,18.67270833,18.66379167,15.19054167,17.50008333,17.25670833,11.91783333,18.122375,16.40791667,13.738625,18.08880131,16.17770833,17.34170833,20.55258333,20.16204167,18.95425,15.75170833,12.903375,6.535916667,11.79633333,11.258875,13.53683334,4.013833333,68.95016553,56.22880796,54.86875,72.77458333,67.05625,77.50708333,54.34583333,68.10708333,80.17541667,81.81666667,82.35583333,76.65208333,78.14083333,69.20416667,71.38833333,76.61625,69.47791667,83.26541667,76.69708333,81.81041667,83.13833333,82.38916667,86.3575,77.92041666,85.6625,79.42583333,74.77958333,74.82458333,79.63875,70.36333333,NA,275.1944445,289.3875,215.4083333,267.6541667,216.225,296.4125,248.4458333,222.325,210.6625,191.7208333,279.4833333,236.8,304.6375,295.0958333,234.1875,310.35,167.1541667,239.2,197.5833333,201.9708333,152.3875,116.675,162.6479167,NA,NA,201.3732639,164.3875,127.8416667,112.0625,6.307666667,0.6096,7.366,1.6256,7.112,5.0292,0,8.0264,11.5824,12.8524,9.144,5.4356,4.9784,0,0,2.0828,0,7.5692,0,1.6764,2.3368,12.1412,20.4724,3.81,8.7884,1.778,2.6416,4.2672,6.1468,0.8128,4.097866667,4.828032,2.950464,3.039872,4.112768,2.861056,3.218688,5.722112,2.324608,3.308096,3.844544,4.02336,2.950464,3.039872,4.02336,3.755136,1.519936,1.78816,3.12928,1.698752,2.592832,2.861056,3.397504,3.755136,4.112768,2.503424,3.844544,2.414016,2.503424,5.275072,37.846,3.048,36.83,8.128,35.56,25.146,0,40.132,57.912,64.262,45.72,27.178,24.892,0,0,10.414,0,37.846,0,8.382,11.684,60.706,102.362,19.05,43.942,8.89,13.208,21.336,30.734,4.064,0.5,0.4,0.2,0.6,0.6,0.4,0,0.6,0.4,0.6,0.6,0.2,0.6,0,0,0.4,0,0.4,0,0.2,0.6,0.4,0.8,0.6,0.6,0.4,0.2,0.2,0.6,0.4,21.11111111,6.446111109,58.055,60.355,82.3,49.28,44.67,75.61,70.5,63.11,45.22,71.36,58.415,40.055,76.64,56.145,61.555,71.555,54.67,55.37,84.08,78.245,68.23,55.64,28.725,1.355,37.225,37.11,43.965,0.615,15.45,15.63333333,15.79,15.93,16.04,16.13,16.19666667,16.24,16.24333333,16.22666667,16.18666667,16.11666667,16.02666667,15.91,15.78,15.61666667,15.45,15.27,15.07666667,14.88,14.66,14.44,14.22333333,14,13.77333333,13.53333333,13.29666667,13.07,12.84,12.59666667,179.0798611,234.6708333,286.925,230.4166667,274.2416667,250.9208333,303.9291667,260.6916667,229.6708333,223.0333333,201.1291667,278.2291667,239.0458333,286.7791667,293.8125,236.2416667,305.1020833,163.8875,257.3375,210.3875,194.475,205.7041667,220.4125,233.5,89.73750001,218.3,216.4083334,175.4458333,121.325,157.1083333,793,832.2,881.6,844.6,886,806.6,883.2,850.8,751.8,775.8,725,868,720.8,883.6,871.8,796.8,918,576.2,797.8,711.8,735.2,736.6,792.8,780,408.4,799.8,768.6,651.2,525.6,596
IAH1ab_2014,IAH1ab,2014,41.99653,-93.696188,"57.6% Loam, 40.3% Clay Loam, 2.1% Silty Loam",37.87623,38.22423,23.89954,10.60166667,14.71,18.498,15.344,14.156,13.502,18.02,16.968,17.022,13.468,15.676,13.7,14.69,16.844,13.544,11.56414923,17.978,14.468,17.466,21.3,17.412,16.122,11.29,5.266,6.454,10.4,12.656,8.154,5.134,4.144,17.38916667,20.40370833,24.10558333,20.72508333,19.43966667,21.04833333,24.135,21.79320833,21.22470833,19.53866667,21.996125,19.722125,22.27325,22.910125,19.9615,22.24116978,20.83691667,20.04629167,22.62979167,25.63441667,21.22841666,22.36791667,16.862,11.497875,14.52995833,16.3215,19.31104167,12.02891667,11.661125,8.981916667,24.43666667,26.654,30.29,26.51,24.19,27.132,29.076,27.3,26.31,25.798,27.39,25.566,28.934,28.834,26.422,29.812,24.022,25.336,28.344,31.112,26.668,29.122,23.322,16.922,22.534,22.946,27.988,16.542,18.958,14.624,7.166145834,12.324875,16.51879167,15.11016667,12.516125,10.56433333,19.58133333,17.800875,19.03704167,15.03183334,16.282125,14.45270833,16.230875,17.91875,13.498375,16.55638464,18.088625,15.22116667,19.16483333,22.248375,18.6625,18.14375,13.44208333,7.919541667,9.932458332,10.867125,13.32325,8.151583334,3.6355,5.011916667,55.95034722,64.41916667,65.54583333,73.48375,67.67291667,54.58541667,77.80833333,80.33166667,88.0675,78.11583333,72.75708333,74.9975,71.81125,75.69166667,70.07875,73.65416667,85.48625,76.82625,82.96791667,83.19166667,86.29166667,79.38458333,83.53541667,81.6975,78.415,74.10625,73.215,79.3475,63.51041667,80.46875,272.4965278,246.5333333,265.6875,237.5,231.6875,286.65,259.5208334,222.1833333,144.4625,251.0916667,280.15,269.925,304.0375,235.7,298.4208333,270.2166667,140.4541667,238.2708333,212.1208333,176.6708333,104.1125,151.9385417,NA,NA,210.9548611,168.4708333,168.3208333,84.35,166.9916667,92.22083333,6.434666667,1.6256,2.6924,5.334,4.1148,0.1016,15.5956,7.9756,17.9324,5.4356,0.7112,4.2672,0,2.0828,0,0,7.5692,1.6764,1.5748,2.4384,19.2532,11.8364,11.0236,3.2004,0,6.9088,0.3048,6.6548,1.3716,8.0264,4.097866667,2.592832,4.02336,3.12928,2.771648,5.453888,3.57632,2.145792,4.380992,3.755136,3.397504,3.308096,3.397504,3.57632,2.861056,0.983488,2.324608,3.039872,2.324608,2.861056,2.861056,3.665728,3.397504,3.844544,2.68224,3.57632,1.966976,4.91744,4.02336,4.4704,38.608,8.128,13.462,26.67,20.574,0.508,77.978,39.878,89.662,27.178,3.556,21.336,0,10.414,0,0,37.846,8.382,7.874,12.192,96.266,59.182,55.118,16.002,0,34.544,1.524,33.274,6.858,40.132,0.333333333,0.6,0.2,0.6,0.2,0.2,0.6,0.4,1,0.2,0.2,0.4,0,0.4,0,0,0.4,0.2,0.2,0.6,0.6,0.6,0.8,0.6,0,0.4,0.2,0.8,0.4,0.6,52.115,53.41,85.72,54.635,45.865,58.585,79.3,60.67,58.33,53.025,63.47,48.165,63.145,68.115,49.915,83.39,55,49.51,69.415,95.275,60.2,72.5,36.53,5.47,22.47,33.365,51.61,11.74,10.23,-3.08,15.71388889,15.87666667,16,16.09666667,16.17,16.22666667,16.24333333,16.24,16.20333333,16.15,16.06666667,15.96,15.83333333,15.68333333,15.51666667,15.34333333,15.15666667,14.96,14.75,14.52666667,14.31,14.09,13.86333333,13.63333333,13.39,13.16,12.93,12.69666667,12.46,12.23333333,274.2395833,251.3125,270.3125,267.975,255.9041667,295.9125,261.975,227.6083333,164.8541666,255.8083333,277.7125,254.975,295.4666667,244.4041667,293.5520833,222.0958333,195.1833333,226.8041667,226.75,223.0708333,179.3625,222.8125,161.7208333,164.3458333,217.4083334,186.3583333,175.1208333,105,178.9125,114.0791667,883,845,906,865.4,762.6,911.6,843.4,738,698.8,805.2,816,795.4,891.2,817.4,883.8,728,639.8,733.2,803,782.4,688.8,774.4,583.6,648.2,775.6,678.6,680.8,441.2,669,450
IAH2_2014,IAH2,2014,42.066206,-94.727606,"90.6% Loam, 9.4% Clay Loam",41.03718,39.61253,19.35029,7.372429049,14.332,17.28,12.6347997,14.112,13.032,18.068,16.7,17.476,13.358,16.432,15.056,14.068,17.036,14.324,14.788,17.822,13.578,17.988,20.288,17.632,15.046,10.57267979,8.436,7.556,10.744,13.366,10.454,4.108,3.544,16.31636374,20.18995833,22.56320833,20.54376666,19.63725,20.31591667,23.83679167,22.086625,21.425125,18.73070833,22.98866667,19.864875,20.746125,23.259125,20.32370833,22.15529167,20.17916667,19.94629167,22.42891667,24.455125,20.82945833,20.61395833,17.76183893,12.80783333,14.23545833,17.35025,19.26141667,14.801125,10.86370833,9.017916667,22.45333333,26.734,28.156,25.988,25.134,26.044,29.61,27.344,25.91,24.778,29.746,24.588,27.746,29.51,26.722,30.256,22.946,26.356,27.566,29.676,24.934,27.11,24.554,17.878,21.554,24.734,27.444,19.824,18.366,15.288,4.23594982,9.501666667,16.95925,16.02661294,13.19695833,10.21220833,20.278375,17.728625,19.56029167,14.355,17.64970833,16.51425,15.14354167,18.94091667,15.661875,16.74941667,18.99616667,15.77133334,19.61854167,22.258,19.15245833,17.617875,14.29554887,10.46470833,9.902166666,12.35670833,14.24008334,12.20641667,2.255940175,4.982333334,48.96916035,56.28875,73.18083333,78.2275,69.88291667,55.82375,81.95666667,78.70916667,89.74583333,78.0625,74.37666667,83.0575,73.25666667,77.90666667,77.42208333,75.125,93.50875,79.90166667,85.98541667,88.60625,90.87791667,84.85375,83.07390957,87.28958333,78.84333333,76.09166667,76.46875,86.25375,60.81333333,80.15125,177.8674242,170.9041667,174.8708333,181.8208333,177.9916667,237.2833333,185.3,208.7,129.0648809,198.775,241.6666667,177.7291667,233.2,185.4958333,201.4083333,232.85,96.49583335,199.5875,149.8,145.1291667,117.6458333,172.975,165.2507092,107.7833333,175.3166667,161.5708333,154.2416667,80.12083333,164.3,110.5041667,0.042333333,0.6604,4.4704,9.4488,0.1016,0.9652,15.4432,4.6228,13.462,8.5344,0,12.0904,0,0.1524,0.2032,0,16.3068,0,4.6736,11.9888,20.2184,0.1524,0,0,0,0,0,0,0,0,4.395893333,3.397504,3.308096,4.380992,3.12928,5.185664,4.649216,2.503424,3.844544,4.02336,3.218688,3.12928,2.414016,3.665728,2.950464,0.625856,2.503424,2.145792,2.145792,2.414016,2.324608,2.861056,3.039872,3.308096,1.877568,3.486912,2.056384,3.486912,3.933952,2.324608,0.254,3.302,22.352,47.244,0.508,4.826,77.216,23.114,67.31,42.672,0,60.452,0,0.762,1.016,0,81.534,0,23.368,59.944,101.092,0.762,0,0,0,0,0,0,0,0,0.166666667,0.2,0.2,0.8,0.2,0.2,0.8,0.4,1,0.4,0,0.8,0,0.2,0.4,0,0.6,0,0.4,0.8,1,0.4,0,0,0,0,0,0,0,0,44.28,52.665,69.34,52.00199924,54.67,47.69,86.335,67.335,58.465,45.34,74.415,49.11,60.615,74.5,52.615,90.22,51.92,49.835,69.55,86.8,56.415,55.39,41.18169949,15.785,22.775,38.695,52.025,25.695,6.185,-2.92,15.68333333,15.84666667,15.97666667,16.08333333,16.16333333,16.22,16.24666667,16.24333333,16.21333333,16.16333333,16.09333333,15.98666667,15.86333333,15.72,15.56,15.38333333,15.19666667,15,14.79666667,14.57,14.35666667,14.13333333,13.91,13.67666667,13.43666667,13.20666667,12.97666667,12.74,12.50666667,12.27666667,267.2291667,258.1,281.3875,244.2458333,267.5458333,293.3333333,231.4041666,275.1833333,186.1416667,269.6833333,303.4708333,225.8416667,280.7375,231.85,271.725,254.2375,136.9833333,254.9125,229.8541667,218.2541667,155.1958334,227.9708333,182.7541667,157.7,214.925,187.3916667,181.5375,116.2541667,177.8375,146.4916667,839.1666667,839,906.6,853.6,826.8,929.6,876,838,761.6,883,918,728.4,874.2,822.4,870.2,840.4,537,815.8,744.6,784.6,646,801.8,692.8,615.4,737,678.2,675.4,548,700.4,540.4
IAH3_2014,IAH3,2014,41.98713,-92.259751,100% Silty Clay Loam,10,57,33,12.23166667,16.622,17.488,13.488,12.656,18.276,17.552,17.834,12.898,16.024,16.234,11.956,16.712,15.068,13.444,16.798,13.856,15.642,19.212,18.79,17.19,13.066,9.754,3.866,8.834,10.424,11.588,3.356,1.134,6.878,19.41274306,22.966,22.469,19.02829167,19.74770833,23.39495833,22.34775,23.01829167,18.68333333,21.39170833,21.65616667,18.51270833,23.27966667,20.235875,21.1375,21.07870833,19.95125,21.96275,23.27675,23.06741667,21.808625,19.95079167,14.44766667,11.73979167,16.0395,17.66666667,17.165125,9.142958333,8.833083334,11.04308333,26.54833333,29.1,27.978,24.344,25.302,28.578,28.802,28.424,24.89,26.568,27.846,25.988,30.646,26.354,29.646,27.154,27.21,29.71,28.366,29.442,28.412,27.934,19.212,20.266,24.354,28.422,24.366,15.044,17.408,16.402,9.872986112,15.64541667,15.94475,13.54375,9.277083335,18.433875,18.24291667,19.44066667,14.44804167,17.29091667,17.17491667,12.97195834,18.28945833,16.54791667,16.096125,18.48608333,15.67825,18.05041667,20.93029167,20.10983333,18.758,15.61958333,12.33654167,7.386333334,11.35270833,11.60604166,13.381625,2.010541667,2.382791667,7.403916667,58.64201389,66.255,70.1125,74.05208333,55.33541667,75.77166666,80.20083334,82.12,79.93083333,79.83958333,78.03833333,73.75833333,76.1675,81.09625,76.53625,86.54625,79.36291667,81.00708333,87.75125,84.88083333,84.53125,78.84041667,88.04291667,79.18708333,77.63666667,73.09666667,81.61041667,64.10791667,70.84666667,82.03458333,249.8402778,270.3166667,253.9,224.9708333,295.325,207.5083333,242.4541667,233.0708333,242.9875,246.5333333,247.5583333,267.6041667,279.4833333,249.7208333,280.7166667,156.8166667,242.4333333,207.0166667,153.9041667,194.0958333,221.375,222.0375,94.02083334,208.95,194.0125,165.6125,118.8875,133.6541667,142.1958333,90.15833335,5.037666667,0.1524,3.9116,2.286,0,16.1036,3.302,6.9596,11.43,4.2164,5.5372,0,0.0508,3.9624,0.9652,2.6416,0,0.1016,4.1656,5.08,11.3792,0.7112,12.192,0.0508,1.4224,0.0508,0.7112,0,0.8636,11.3284,4.69392,2.771648,3.486912,2.145792,3.755136,4.828032,1.162304,3.308096,3.933952,4.112768,3.57632,2.771648,4.02336,4.202176,1.609344,2.145792,2.056384,1.430528,1.78816,2.414016,2.68224,2.771648,4.112768,0.804672,2.592832,0.715264,2.2352,3.486912,1.072896,4.02336,30.226,0.762,19.558,11.43,0,80.518,16.51,34.798,57.15,21.082,27.686,0,0.254,19.812,4.826,13.208,0,0.508,20.828,25.4,56.896,3.556,60.96,0.254,7.112,0.254,3.556,0,4.318,56.642,0.333333333,0.2,1,0.2,0,0.6,0.6,0.6,0.4,0.6,0.2,0,0.2,0.4,0.4,0.8,0,0.4,0.8,0.8,0.8,0.6,0.8,0.2,0.6,0.2,0.4,0,0.4,0.6,62.06,70.135,72,44.58,44.895,67.135,71.635,65.645,44.47,56.48,64.95,44.86,83.585,59.305,71.695,59.88,59.835,83.575,72.445,76.025,74.695,63.695,22.415,10.33,32.97,55.67,39.885,-4,-3.645,8.2,15.79444444,15.95,16.05333333,16.14,16.19666667,16.22666667,16.24,16.21333333,16.17,16.1,16,15.88666667,15.73666667,15.6,15.41666667,15.23666667,15.03333333,14.82666667,14.61666667,14.40333333,14.18333333,13.94666667,13.71333333,13.48666667,13.25666667,13.02666667,12.78333333,12.56,12.32666667,12.1,280.9270833,274.2541667,251.15,254.9041667,284.5041667,244.6333333,234.0916667,249.0166667,244.5833333,263.9375,245.1333333,261.8458333,289.5541667,258.8458333,265.1666667,194.275,254.6083333,210.3666667,163.4083333,188.7875,232.3833333,207.9041667,151.6125,215.6666667,191.1,181.725,121.7458333,160.6666667,125.25,110.5791667,850.5,871.8,808.4,867.8,848.2,868.8,795,843.2,802.2,801.4,780.6,865.8,916.4,855.6,893,697.8,855.2,709,661,718,833.6,744.2,711.6,766.6,715.4,667.8,572.2,659,475,478.4
IAH4_2014,IAH4,2014,41.198645,-91.486943,100% Silty Clay Loam,10,57,33,14.07333333,16.136,18.102,14.788,13.312,16.422,18.734,18.388,16.232,16.89,16.824,11.256,16.732,15.844,13.278,16.932,15.954,14.976,19.088,20.656,14.81292378,15.012,11.646,4.066,9.522,8.89,11.856,5.222,4.676,6.7,20.92951389,22.328875,24.40841667,19.47225,18.8985,23.61008333,23.03754166,23.85333333,20.88958333,22.10433333,22.80091667,18.84433333,23.306125,21.06429167,21.56033334,21.61883333,21.61283333,21.208625,23.93779167,25.55029166,22.46206091,21.678,17.64829167,11.33433333,16.87433333,16.97245833,18.68870834,10.96916667,11.71904167,11.63175,26.91833333,29.456,30.956,24.744,24.466,30.002,28.678,29.446,25.9,26.824,29.846,26.188,30.002,27.558,31.178,26.722,28.836,28.644,30.234,32.654,28.022,29.242,24.01,19.402,25.322,27.078,28.366,16.388,21.312,17.622,9.508038194,15.93616667,16.23258333,15.05879167,11.96491667,16.45454167,19.81504167,19.01875,17.276875,17.20395833,17.5985,12.43966667,17.78883333,16.24833333,15.05804167,18.17379167,17.095625,16.766,20.71129167,21.46491667,19.32487505,17.08495833,13.77879167,7.328958334,11.74466667,9.630666667,12.52308333,5.306291667,4.131416667,9.198291666,52.02951389,69.55333333,63.62791667,78.17041667,69.22708333,67.14041667,84.09916667,76.43666667,81.6425,76.40583333,75.41208333,70.84583333,73.98875,76.86666667,71.28833333,82.91208333,78.11458333,79.29916667,83.95458333,80.67541667,83.95625,78.01208333,80.69833333,80.97833333,75.63458333,67.79666667,73.03875,71.71833333,66.02958333,87.84208333,270.9869124,230.1041667,304.1416667,204.9041667,250.2166667,287.2125,218.1208333,273.7083333,228.6083333,283.5375,300.6416667,297.0625,290.9416667,246.6666667,300.925,166.5458333,212,191.6333333,179.1833333,210.7916667,198.3666667,237.1333333,160.3583333,180.5458333,184.4791667,184.575,155.8708333,117.8833333,156.6083333,73.62083335,1.651,1.8796,5.6388,6.1468,0.7112,8.2296,25.0952,5.9436,10.5156,8.2804,3.4036,0,1.8796,2.4892,0,3.9116,0,0,2.286,1.8288,12.9032,2.54,0.4572,0.6096,0,0,0.3048,4.6228,0.4064,1.7272,4.172373333,3.665728,4.02336,2.861056,3.844544,5.185664,2.503424,3.486912,4.112768,3.308096,3.12928,2.68224,3.755136,3.308096,2.056384,2.145792,3.397504,2.414016,2.2352,2.414016,3.57632,3.57632,4.291584,2.056384,3.486912,1.877568,2.592832,4.649216,3.12928,4.112768,9.906,9.398,28.194,30.734,3.556,41.148,125.476,29.718,52.578,41.402,17.018,0,9.398,12.446,0,19.558,0,0,11.43,9.144,64.516,12.7,2.286,3.048,0,0,1.524,23.114,2.032,8.636,0.5,0.4,1,0.4,0.4,0.6,0.6,0.4,0.6,0.2,0.4,0,0.4,0.2,0,0.8,0,0,0.4,0.4,0.8,0.4,0.4,0.8,0,0,0.2,0.8,0.2,0.4,74.945,77.645,87.11,48.83,44.445,82.14,73.865,75.97,55.33,68.53,75.09,43.61,78.64,58.505,90.165,72,68.085,79.47,84.335,95.69,76.305,64.44,39.14,8.67,37.11,39.92,75.085,4.025,14.97,10.805,15.69444444,15.84,15.94666667,16.03666667,16.09666667,16.13333333,16.15,16.13333333,16.09333333,16.02666667,15.94,15.82333333,15.69666667,15.55,15.38333333,15.2,15.01,14.81333333,14.61333333,14.4,14.18333333,13.96666667,13.74,13.51666667,13.29,13.06333333,12.84,12.61666667,12.39666667,12.16333333,268.9826389,229.5,301.55,204.9375,258.4791667,284.8541667,215.5875,262.8375,232.5833333,280.6083333,285.3541667,290.4791667,294.0791667,260.2625,298.4729167,178.2125,255.8083333,200.7041667,185.0291667,198.8875,251.6791667,238.9458333,128.5125,219.2291667,208.9375,186.7291667,140.15,152.8083333,151.6666667,105.6125,842.1666667,803,942.4,712,825.4,913.4,781.6,813.8,812,877,897.8,889,894.6,913.6,917.4,646.2,860.4,682.8,724.2,704.8,846.8,835.2,563,780.8,735,715,552,676,585.6,448
ILH1_2014,ILH1,2014,40.061135,-88.233184,"64.2% Silt Loam, 35.8% Silty Clay Loam",17.62757,62.28886,20.08357,15.63,10.134,9.1,13.378,17.834,17.778,14.698,13.844,21.8,18.922,19.888,14.778,17.446,16.324,11.924,13.578,14.886,13.766,17.592,16.176,15.832,19.902,19.046,19.652,13.646,11.134,6.278,8.3,9.112,10.956,22.23313338,13.46,16.43041667,20.65854167,23.326875,22.24133865,19.987125,19.85175,26.53645833,24.13275,24.52670833,20.44783333,23.235375,21.87495833,19.21279167,20.897375,20.95225,21.60754167,21.49025,21.31920833,21.29575,24.57533333,24.5775,23.76804167,21.0145,15.00095833,13.58133333,16.119875,17.82983333,17.69816667,28.95333333,17.368,23.524,27.388,29.888,27.708,25.644,25.488,32.002,30.222,29.932,26.364,29.478,28.168,27.29,27.592,27.866,30.854,25.878,27.466,27.934,30.8,32.71,29.732,29.57,19.956,21.766,25.71,29.612,25.498,11.92748922,11.159625,9.353958333,11.26158333,15.79479167,16.59295035,14.63870833,13.17995833,20.83891667,19.91041667,20.97725,15.12991667,17.92854167,17.59641667,14.43125,15.957875,16.190625,16.33108333,18.290625,16.71866667,18.09508333,22.246375,21.02554167,20.25595834,15.78691667,12.46133333,9.06425,10.26433333,10.19170833,12.64370833,56.52620929,86.90208333,67.04375,58.28208333,67.31791667,73.56677305,74.74583333,69.60458333,72.47041667,79.3925,81.82541667,74.79,74.79791666,78.71166667,77.32833333,75.90958333,76.8825,75.9775,82.75333333,77.435,83.68416667,87.79791667,82.24416667,82.54458333,76.58916667,86.28083333,79.82708333,74.42958333,69.69875,76.57041667,241.4610339,140.8166667,266.8125,302.4958333,269.3208333,257.8076241,219.1666667,280.7041666,269.35,280.4208333,245.2791667,271.7333333,276.675,237.2333333,243.0166667,268.0166667,244.1833333,261.8208333,145.4416667,205.5541667,170.6458333,160.6541667,207.7166667,180.1041667,211.2291667,90.58749999,168.525,202.7458333,183.025,138.1416667,10.414,2.9972,6.096,0,4.064,4.9784,5.9436,0.254,1.9812,5.2832,2.4892,4.4704,0.5588,14.6812,0,0.1524,3.5052,0,1.0668,1.2192,0.1016,1.4732,0.9652,1.1176,0.8128,3.0988,1.8288,3.2512,0,4.318,6.7056,5.990336,4.828032,3.57632,4.02336,5.36448,4.291584,5.006848,4.4704,2.950464,4.559808,3.308096,4.380992,3.755136,1.609344,3.755136,4.112768,1.430528,3.57632,3.397504,3.12928,3.039872,3.039872,3.844544,3.665728,4.202176,2.145792,3.755136,2.414016,4.380992,62.484,14.986,30.48,0,20.32,24.892,29.718,1.27,9.906,26.416,12.446,22.352,2.794,73.406,0,0.762,17.526,0,5.334,6.096,0.508,7.366,4.826,5.588,4.064,15.494,9.144,16.256,0,21.59,0.5,0.8,0.2,0,0.4,0.6,0.6,0.4,0.4,0.6,0.2,0.4,0.4,0.6,0,0.2,0.4,0,0.6,0.2,0.4,0.6,0.8,0.8,0.2,0.4,0.2,0.2,0,0.4,90.08,18.755,35.755,58.11,80.665,73.825,50.855,48.33,100,87.555,90.33,52.855,70.145,74.09,48.035,67.7,62.41,92.165,58.675,59.105,71.475,87.28,100,89.605,65.815,27.725,20.11,35.025,74.64,50.025,15.19444444,15.38,15.51666667,15.65333333,15.77333333,15.87333333,15.94,15.99666667,16.02333333,16.02333333,15.99666667,15.95333333,15.88,15.78333333,15.67,15.53666667,15.39333333,15.23,15.04666667,14.87333333,14.68,14.48,14.27,14.06333333,13.85666667,13.63333333,13.41666667,13.20333333,12.99,12.76666667,292.7222222,157.3166667,262.4583333,301.3083333,267.9458333,268.15,244.9583333,286.7958333,293.2666667,296.2083333,279.6208333,273.7041667,313.3833333,255.7833333,290.6916667,290.9958333,274.2416667,289.2979167,142.8083333,251.0208334,180.0291667,215.6041667,216.4333333,208.3,215.3708333,148.0166667,188.075,216.4583333,209.0541667,132.0875,920.1666667,597.2,890.8,899.2,894.6,850.8,783,880,889.4,890.2,906.4,875.4,963.2,841.6,896.2,883.6,880.6,880.2,561.8,865,672,747.2,762.8,759,734.6,535.2,704.2,783.8,760.4,628.4
INH1_2014,INH1,2014,40.488,-87.006,"66.1% Silty Clay Loam, 33.9% Silt Loam",14.02764,59.79271,26.17964,15.83333333,19,15.77777778,17.40133333,19.334,19.81,19.466,15.9,16.844,15.71,10.6,13.49,13.49,13.212,15.522,16.722,13.322,19.022,18.722,19.6,15.076,12.778,5.99,8.578,7.866,9.766,4.79,3.778,12.19,3.156,22.22222222,23.14594444,19.89804167,19.96216667,25.10679167,23.97841667,24.306,21.4445,22.64558334,22.04833333,18.028625,21.96991667,19.82358333,20.77983333,21.726375,21.02433333,19.92625,23.56766667,23.87175,23.65791667,21.70133333,17.074875,12.5395,15.784625,16.56754167,17.47433333,10.82945833,10.19216667,15.03708333,9.201500001,28.42592593,26.22222222,15.77777778,24.84533333,31.466,30.188,30.222,27.066,28.512,28.5,25.844,30.566,27.322,30,30.078,26.866,28,30.944,32.266,29.6,29.4,23.378,20.71,24.7,28.678,27.744,17.1,17.756,19.144,16.2,14.90740741,13.63995833,12.402625,13.588875,19.190875,20.37920833,20.14391667,16.54270833,17.75391667,17.93729167,13.37725,16.756625,15.68,16.52883333,17.49454167,17.658625,16.531625,21.47704167,21.091375,21.27525,17.81504167,14.53541667,8.822,10.89820833,10.12658333,12.02254167,6.662666666,5.443375,12.93795833,5.057875,63.62693907,60.35441899,67.49166667,71.49375,71.50416667,82.16583333,79.38833333,76.14041667,76.04875,80.31333333,77.60333333,75.66625,79.27166667,80.02625,79.42708333,82.95541667,83.71916667,89.19708333,86.01166667,87.40333333,81.56625,87.13916667,82.74791667,77.78875,73.63875,75.94791667,78.04875,77.23791667,88.29041667,78.71708333,NA,242.0833334,333.8583334,275.3,283.7583333,265.1125,285.2583333,277.7125,294.55,265.3708333,273.6083333,279.3958333,197.0208333,253.2083333,200.0375,146.9333333,204.6291667,163.8458333,203.225,156.3208333,195.2708333,105.3791667,154.5375,163.9916667,180.35,149.65,91.42916666,113.3708333,73.80000001,107.5458333,0,5.2324,6.6548,6.7056,6.8072,2.1844,0.3048,2.7432,5.4864,4.6228,0,0.1016,4.9276,0.762,0,11.0236,1.016,17.9832,4.4196,1.2192,0.0508,0.9144,3.048,2.794,1.3716,2.4384,2.3368,0.3048,0.508,0.1016,2.68224,3.486912,2.771648,3.486912,3.218688,1.78816,2.592832,2.950464,3.308096,2.145792,1.877568,1.877568,2.950464,1.251712,2.056384,3.12928,1.877568,2.056384,1.966976,2.771648,2.145792,2.950464,1.430528,2.68224,0.983488,2.2352,3.844544,2.950464,3.486912,2.950464,0,26.162,33.274,33.528,34.036,10.922,1.524,13.716,27.432,23.114,0,0.508,24.638,3.81,0,55.118,5.08,89.916,22.098,6.096,0.254,4.572,15.24,13.97,6.858,12.192,11.684,1.524,2.54,0.508,0,0.8,0.4,0.6,0.6,0.8,0.4,0.6,0.4,0.6,0,0.2,0.6,0.4,0,0.6,0.6,1,1,0.8,0.2,0.6,1,1,1,0.2,1,1,1,0.4,72.77777779,70,28.88888888,55.61666666,91.305,89.36,90.08,61.5,66.64,69.805,41.11,80.695,57.975,73.89,83.25,58.97,58.305,85.945,100,81.86,77.08,40.39,16.75,33.195,60.86,63.805,4.725,3.835,28.335,-1.61,15.775,15.88666667,15.96666667,16.02,16.05666667,16.06333333,16.04333333,15.99666667,15.93,15.83666667,15.72666667,15.59666667,15.44333333,15.28333333,15.11,14.92333333,14.73666667,14.53666667,14.33,14.12,13.9,13.67666667,13.47333333,13.25,13.02666667,12.80666667,12.58666667,12.37,12.15,11.93666667,309.0104167,251.5666667,314.7,273.7083333,279.85,266.2333333,283.6875,274.8708333,289.6583333,264.1416667,284.7541667,296.0916666,238.5416666,289.3791667,210.375,202.55,209.1041667,209.6041667,219.0125,189.6875,235.6625,121.825,196.2791667,216.8708333,215.2166667,163.2666667,130.5958333,108.025,73.89999999,147.4375,913,861.4,958.6,901,889,870,909.2,894.8,928.2,891.6,908.8,938.2,820,908.2,774.4,755.8,755.6,727,818.8,697,795.2,488.6,727.2,777.2,760,716,537.2,489.2,392.2,595.4
MNH1_2014,MNH1,2014,44.06971707,-93.53409096,"96.6% Clay Loam, 3.4% Loam",33.30162,34.21062,32.48776,4.788316696,11.3,16.72,15.378,13.19,12.622,17.278,17.568,18.578,13.08,15.232,14.08,14.168,16.71,13.656,13.478,16.6,13.72,16.878,19.332,15.612,14.512,11.09,5.888,6.246,9.202,14.234,7.802,1.056,0.956,13.25829827,19.38883333,22.46220833,19.54820833,18.61920833,18.68875,21.73029167,22.50191667,22.57554167,18.94591667,21.86766667,19.26291667,20.840125,23.3925,19.52008333,21.747125,21.44145833,20.46075,22.72133333,24.01783333,19.66158333,20.193375,17.59645833,11.531875,13.53404167,16.3415,19.281875,11.47625,7.223291667,7.104958333,18.60333333,26.7,28.752,23.876,24.134,24.134,26.634,27.298,27.432,24.744,28.712,23.568,27.19,29.012,25.232,29.878,27.222,27.058,29.654,30.224,24.702,25.8,24.51,16.498,21.476,24.176,25.808,15.268,13.488,14.178,4.885492424,8.464875,13.6295,14.71504166,11.78991667,9.923541667,18.170625,16.05170833,18.565,11.93608333,14.99916667,14.14841667,13.412875,17.33483333,15.19629167,15.38075,15.88945833,14.385,18.49358333,20.77433333,16.31495833,17.34,13.07933333,8.222250001,7.854333333,11.48,13.347875,9.073208332,1.329291667,1.958083333,62.10978535,54.55416667,64.12708334,76.20958333,68.4825,61.09375,82.12041666,69.74,79.33625,67.84625,69.0225,74.69666667,65.63166667,70.97416667,78.43958333,71.28541667,73.24083333,71.57666667,79.34,83.53083333,82.96333333,85.07,77.64083333,82.955,73.10833333,76.6125,71.54541667,86.35958333,69.89458333,74.5475,236.3184975,272.7291667,263.2833333,224.175,236.4416667,251.5166667,222.3333333,299.55,208.8,291.8958333,302.9791667,241.175,276.25,286.2041667,233.1541667,271.8583333,219.8166667,231.0625,221.6875,215.35,184.625,200.7166667,197.1791667,125.8041667,203.6083333,196.525,155.0083333,75.42916667,144.2666667,138.8625,1.947333333,0.0508,10.922,7.8232,3.5052,10.668,28.956,0,3.7084,1.0668,0.8128,0.9652,0,1.5748,0.508,1.27,0.2032,0,0.3048,4.1656,4.572,6.2484,0.0508,1.3716,1.0668,4.4196,1.1684,5.2832,0,1.016,3.501813333,2.861056,3.665728,3.933952,3.12928,4.738624,5.096256,2.145792,4.828032,3.933952,3.486912,3.755136,3.039872,3.397504,2.145792,0.625856,2.324608,2.503424,1.877568,2.950464,2.056384,2.592832,3.12928,2.503424,1.877568,3.397504,3.039872,4.112768,3.57632,2.056384,11.684,0.254,54.61,39.116,17.526,53.34,144.78,0,18.542,5.334,4.064,4.826,0,7.874,2.54,6.35,1.016,0,1.524,20.828,22.86,31.242,0.254,6.858,5.334,22.098,5.842,26.416,0,5.08,0.333333333,0.2,0.4,0.6,0.2,0.4,0.8,0,0.8,0.4,0.4,0.4,0,0.2,0.2,0.2,0.4,0,0.6,0.8,0.4,1,0.2,0.4,0.4,0.6,0.2,0.6,0,0.2,10.17495009,45,76.795,48.135,50.92,41.89,59.78,62.165,71.47,44.56,71.305,44.12,57.62,66.97,47.22,72.53,59.555,51.945,77.745,89.195,50.785,50.78,39,5.965,19.305,33.445,50.105,7.675,-13.64,-12.165,15.88333333,16.06333333,16.20333333,16.31333333,16.40333333,16.46666667,16.49333333,16.49333333,16.46333333,16.40666667,16.32,16.21333333,16.07333333,15.91666667,15.74666667,15.56,15.35333333,15.14333333,14.92,14.68666667,14.45,14.21,13.96666667,13.72,13.47,13.21666667,12.96666667,12.71666667,12.47,12.21666667,230.8784722,291.1,273.8625,265.6416667,273.9041667,264.4083333,225.325,262.0083333,197.1625,268.7958333,303.7583334,214.15,296.8833334,297.8166666,244.5166666,263.375,252.8041667,259.7208333,226.8,223.3291667,192.5333333,212.45,187.5708333,158.3625,205.2458333,168,151.7708333,86.94166667,152.0375,115.2583333,805,864.2,832.6,936.2,829.2,829.8,762.2,855.2,697.6,932.6,900.4,790.4,848.6,916.2,858.4,836,751.2,802.2,793.2,786.2,683.8,799.4,688,572.6,742,639.8,573.6,394.2,642.2,469.8
MOH1_2014,MOH1,2014,38.898702,-92.20997,100% Silt Loam,21.88,65.24,12.88,16.05333333,5.246,12.788,16.298,18.888,18.676,15.922,15.466,21.988,18.79,20.588,15.044,13.31800087,16.9,14.988,18.644,15.244,17.068,20.2,15.176,19.6,21.334,20.812,19.466,14.434,9.766,12.512,10.68,14.7,10.856,22.62106151,9.9625,20.4575,21.369625,24.37629167,22.72816667,19.274,20.78516667,26.69695833,24.57904167,25.766875,21.57141666,23.89250002,22.79954167,22.451125,25.16895833,22.88916667,24.03370833,23.331375,21.849375,24.13945833,28.72175,26.75845833,24.3865,21.34766667,14.7765,17.42783333,18.66683334,21.75433333,15.602375,29.81333333,14.434,27.722,27.256,30.036,26.902,23.344,25.992,32.954,30.39,31.546,28.246,30.9,30.044,30,32.556,31.666,33.212,29.044,30.122,31.012,38.656,34.768,31.866,30.08,20.256,24.01,27.012,31.29,22.488,15.35334822,4.719458334,12.28370833,15.47025,18.692375,18.75029167,17.11208333,15.51670833,20.747375,19.377625,20.88754167,14.98870833,18.48397545,17.492,15.22545833,19.245125,15.135375,17.09658333,20.69920833,16.45595833,20.94433333,21.62666667,20.45870833,19.56692208,16.17808333,11.29158333,13.86675,11.57175,13.669125,11.03595833,67.03392857,73.96916667,61.89166667,72.39291667,73.1525,80.05583333,88.10291667,74.63083333,71.33666667,75.60916666,76.05666667,69.51833333,74.0125,74.53208333,67.665,71.73625,66.325,68.765,86.59166667,75.32833333,84.27291667,69.02875,71.45458333,78.07291666,75.50958333,82.25166667,81.96,68.755,65.41333333,78.48916667,358.1385031,197.4333333,294.725,242.8833333,290.8208333,189.1875,156.8125,264.275,288.7291667,314.8458333,257.3583333,261.9666667,313.8583333,255.7083333,306.5208333,255.0375,292.2958333,249.9083333,143.675,255.6041667,199.6833333,286.6791667,245.3041667,207.9791667,241.575,144.05,159.75,235.6791667,208.0375,130.9791667,12.14966667,0.6604,0,1.4732,0.762,9.0932,10.4648,0.8636,9.5504,4.9276,1.778,0.3048,5.588,2.4892,1.8796,0.2032,0,0.254,9.6012,0.7112,3.048,0,0.0508,35.0012,4.2672,3.9624,0.3556,0,0,29.3116,5.588,3.218688,4.559808,2.771648,3.308096,3.218688,3.933952,4.291584,4.380992,3.039872,4.828032,4.02336,3.665728,3.308096,2.503424,3.933952,3.218688,2.592832,2.771648,2.861056,2.861056,2.950464,3.397504,4.02336,3.933952,3.844544,3.308096,3.486912,1.966976,4.380992,72.898,3.302,0,7.366,3.81,45.466,52.324,4.318,47.752,24.638,8.89,1.524,27.94,12.446,9.398,1.016,0,1.27,48.006,3.556,15.24,0,0.254,175.006,21.336,19.812,1.778,0,0,146.558,0.833333333,0.4,0,0.4,0.6,0.4,0.6,0.4,0.2,0.4,0.8,0.4,0.2,0.4,0.2,0.2,0,0.2,0.8,0.4,0.4,0,0.2,0.4,0.6,0.6,0.6,0,0,0.6,90.83,-0.8,65.445,64.83,88.115,67.945,48.165,57.53,100,87.64,94.25,71.5,84.94,71.39,73.55,92,92.53,100,75.86,78.525,87.89,100,100,82.335,70.785,25.055,41.305,51.005,83.945,40.64,15.13333333,15.31333333,15.44666667,15.57333333,15.68333333,15.77,15.83666667,15.87666667,15.90333333,15.89333333,15.86333333,15.81666667,15.74666667,15.65333333,15.53666667,15.40666667,15.26666667,15.10666667,14.93666667,14.76,14.57666667,14.38,14.18666667,13.98333333,13.78,13.57,13.36333333,13.15333333,12.94666667,12.73,269.1909722,211.4,293.0416667,249.2416667,298.4958333,211.175,167.725,274.1625,280.35,301.9833333,259.7958333,267.275,317.2916667,259.9125,299.5166667,261.6583333,287.8625,267.0291667,154.975,234.5333333,228.9208333,274.5208333,235.2041667,200.1208333,210.3875,149.1125,184.4916667,221.2791667,220.0291667,134.3125,880.3333333,737.2,921.4,829,922.8,794.2,646.4,836.6,911.6,903,900.8,858.6,954.8,863.8,889.4,871,920.4,875,618.6,792,820.8,876.2,823.6,771.4,733.4,633.8,685.8,810.2,757.6,618.2
MOH2_2014,MOH2,2014,38.928745,-92.352163,"99.7% Silt Loam, 0.3% Clay Loam",21.91431,65.14438,12.94131,14.14,10.576,6.61,15.678,17.91,19.222,16.866,13.722,21.924,20.066,19.256,16.822,18.28,14.94425059,12.5,17.712,17.302,13.914,19.178,16.556,17.288,20.188,20.222,19.158,11.28870622,13.744,8.324,11.234,10.476,13.302,21.71790046,16.15,15.51141667,21.98175,23.90895833,25.53854166,20.3635,19.1035,27.05766667,25.19220833,25.86525,23.10875,24.29975,25.15138022,20.37416667,25.57583333,23.97766667,22.31529167,23.79933333,22.40404167,22.79775,26.62733333,26.70083333,23.976875,22.32278809,18.89041666,14.979125,18.58041667,18.38808333,19.63533333,29.38055556,20.786,23.512,28.544,30.876,31.578,24.332,24.346,32.644,31.98,32.146,29.69,30.9,32.224,28.48,32.822,31.334,31.522,30.132,29.22,30.112,34.878,34.846,30.468,29.78955556,24.554,22.588,27.122,28.444,28.144,13.41127778,11.54270833,7.152666666,14.85454167,18.77683333,19.37733333,17.903625,14.94229167,20.70654167,20.72575,20.66895833,16.87875,19.139,20.10609653,13.8575,18.881125,17.55633333,16.09570833,20.53625,18.40954167,19.744875,22.847875,22.52433333,20.81608333,15.66352929,12.59975,8.923416668,11.360125,10.32545833,12.70604167,62.06471448,77.48166667,63.08458333,68.13583333,76.1425,71.51291667,86.59708333,80.77583333,69.61833333,78.78041667,75.54916667,71.93791667,75.6,76.26916667,71.47333333,70.28125,70.83125,73.02958333,84.41916667,80.99708333,85.12625,82.44,80.92583333,85.05,68.86142186,68.22166667,70.22666667,67.06625,64.45708333,68.81875,234.2958333,188.1041667,306.4166667,250.5333333,282.9778985,271.3291667,146.6333333,227.6541667,279.5083333,292.8291667,288.4708333,294.3458333,258.0916667,264.3958333,297.5458333,313.3916667,252.5083333,270.6083333,169.6166667,239.1375,184.6916667,268.6875,252.65,170.2208333,265.1802083,127.5666667,186.3666667,230.3791667,220.6708333,165.15,3.556,2.4892,0.1016,0.6096,0.762,9.7028,6.0452,4.1656,0.254,12.7508,1.2192,1.4732,7.874,2.54,0,0,0.1524,0.2032,16.4592,0.1016,3.4544,0.254,0.4572,32.004,0.7112,0,0.0508,0,0.0508,0,5.066453333,4.828032,4.02336,3.12928,2.771648,3.665728,3.755136,3.665728,5.096256,3.218688,3.933952,4.112768,4.291584,3.486912,2.324608,3.397504,4.291584,2.2352,3.039872,2.68224,2.771648,2.861056,3.039872,3.665728,4.112768,4.4704,3.12928,3.57632,2.503424,2.771648,21.336,12.446,0.508,3.048,3.81,48.514,30.226,20.828,1.27,63.754,6.096,7.366,39.37,12.7,0,0,0.762,1.016,82.296,0.508,17.272,1.27,2.286,160.02,3.556,0,0.254,0,0.254,0,0.5,0.6,0.2,0.4,0.6,0.4,0.6,0.6,0.4,0.6,0.2,0.6,0.6,0.4,0,0,0.2,0.2,0.6,0.2,0.4,0.2,0.2,0.6,0.2,0,0.2,0,0.2,0,101.95,41.245,31.69,71.555,100,92.89,52.995,45.17,93.75,88.42,100,74.835,77.7,86.085,59.95,92.19,82.145,100,86.275,64.44,86.055,100,100,86.06,70.41777778,50.305,27.28,53.555,54.91,77.64,15.06666667,15.25,15.39333333,15.52666667,15.64,15.74,15.81333333,15.86333333,15.89333333,15.90333333,15.87666667,15.83666667,15.77666667,15.69333333,15.58666667,15.46,15.32666667,15.16666667,15.01,14.82666667,14.65666667,14.45666667,14.26666667,14.06333333,13.86333333,13.65,13.45,13.23333333,13.03333333,12.81666667,280.8611111,200.1208333,308.2666667,253.8833333,270.15,277.025,168.1875,230.2916667,278.1916667,278.0875,280.3083333,297.6666667,274.4875,264.8458333,291.7791667,313.1333333,258.3,267.6625,175.6041667,266.7625,174.9583333,266.1208333,242.675,209.4958333,248.2625,142.8208333,161.3458333,232.7666667,206.7458333,134.3166667,894.1666667,717.6,937,850.6,862.8,929,660.4,709.6,893.4,896.4,917.6,944.4,863.6,874.2,891.6,905,894,901.4,648,862.8,696.6,876.6,829.2,780.2,853.4,547.8,691.4,791.2,768.8,613.4
NCH1_2014,NCH1,2014,35.29921111,-77.57159444,100% Sandy Loam,65.13,24.85,10.02,15.49166667,14.412,20.2,16.1,15.636,17.868,14.898,18.564,20.01,20.178,21.132,21.334,19.402,18.92,22.6,20.888,19.92,16.61773487,19.59,21.09,20.022,18.502,21.488,19.348,19.158,23.246,21.522,19.8,16.978,14.32251206,20.12617647,21.99004167,25.861375,20.76391667,22.076875,23.998875,20.95725,24.62891667,25.547,25.988875,26.51833333,26.06441667,25.50929167,24.96145833,26.82958333,25.86375,24.44225,25.97032781,24.50758333,24.0935,23.80383333,25.10141667,26.61445833,24.4135,25.39320833,28.55825,24.444125,23.481,21.992125,20.34086373,25.24166667,29.588,32.99,25.724,28.366,30.512,26.924,31.344,31.78,32.536,33.078,32.334,31.756,31.066,32.488,32.032,30.444,32.11,30.044,28.668,28.654,32.61,34.066,31.566,33.166,35.368,29.234,29.122,28.422,24.422,16.20575163,12.86704167,17.574375,14.58691667,12.63554167,14.93679167,13.19554167,17.664,20.45033333,20.44929167,21.24733333,21.19216667,19.87575,19.05995834,22.00433333,21.72829167,20.885,22.64649346,19.42870833,22.00058333,20.27175,18.76604167,22.39929167,19.50829166,20.37929167,22.614,22.069125,20.36141667,17.54225,16.77003865,80.37285539,61.02208333,64.68166667,70.57541667,58.59958334,61.37166667,67.20708333,68.97583333,75.65416667,74.11791667,75.48166667,76.95166667,73.765,73.12333334,77.29,80.0375,82.62958333,83.57791667,76.16708333,89.80666667,82.24416667,71.81333333,80.69958333,76.76666667,76.96875,73.04083333,88.19125,84.06166667,78.50083334,82.33857269,175.8245507,306.9375,292.5583333,265.7583333,318.6958334,318.7125,266.3333333,284.4333333,262.1666667,305.6708334,289.05,283.8791667,305.025,302.3041667,254.4583333,244.6833333,219.2875,206.2541667,237.2375,149.2791667,178.0333333,281.6083333,238.2458333,229.6666667,237.0083333,250.7708333,127.375,147.9541667,195.5625,111.1526596,0.211666667,0,0,12.5984,0,0,0,0.0508,3.3528,0.8636,1.8288,0.3048,0.6096,0.6604,0.2032,0.1524,0.2032,0.0508,0.1016,0.1524,0.6096,0.508,1.6256,0,0,0,7.4676,0.0508,0.1524,1.9304,2.756746667,2.2352,2.324608,2.324608,1.966976,2.771648,1.34112,2.056384,2.145792,1.609344,2.145792,1.519936,1.698752,2.592832,2.592832,2.145792,1.251712,1.698752,1.609344,0.715264,1.609344,1.072896,1.162304,2.056384,1.34112,1.877568,2.056384,1.966976,1.34112,3.218688,1.27,0,0,62.992,0,0,0,0.254,16.764,4.318,9.144,1.524,3.048,3.302,1.016,0.762,1.016,0.254,0.508,0.762,3.048,2.54,8.128,0,0,0,37.338,0.254,0.762,9.652,0.166666667,0,0,0.2,0,0,0,0.2,0.2,0.4,0.6,0.2,0.2,0.6,0.4,0.4,0.4,0.2,0.2,0.4,0.2,0.2,0.4,0,0,0,0.6,0.2,0.4,0.4,62.2,73.33,100,58.365,74.725,83.31,54.555,86.915,94.835,100,95.165,94.445,88.055,84.915,95.585,94.22,83.36,94.36,87.61,80.755,80.055,100,100,85.06,100,100,87.415,83.055,68.39,51.33128016,14.60555556,14.77333333,14.91666667,15.05,15.17,15.27333333,15.36,15.43333333,15.49333333,15.52666667,15.53666667,15.53,15.50333333,15.45333333,15.39,15.30333333,15.20333333,15.09,14.96,14.82333333,14.67666667,14.51333333,14.35333333,14.18666667,14.01333333,13.83333333,13.66,13.47666667,13.29,13.11,186.0104167,313.0125,296.8416667,277.3,320.6583333,316.2958334,270.9708333,288.3,271.075,321.2375,292.5583333,289.8875,307.2125,303.425,271.0833333,251.7625,213.9583333,251.5666667,247.2375,204.7291667,197.9958333,286.35,256.1791667,232.2333333,240.7291667,258.8625,140.6708333,157.5041667,199.8166666,109.7666667,716.8333333,951.2,943.4,916.6,972.8,978.2,849.6,929.2,925.6,963,950.4,942.6,920.6,939,874.4,861.4,775.2,893.6,842.4,758.6,722.6,933,863.8,871.4,845.6,875,652.4,659.8,791.2,497.2
NEH1_2014,NEH1,2014,40.834392,-96.656687,"99.9% Silt Loam, 0.1% Silty Clay Loam",21.86907,65.22986,12.90107,9.952962964,15.91,18.768,16.546,15.576,14.01,20.322,17.69,19.366,15.222,18.088,17.812,14.488,21.868,12.84932966,16.854,20.478,15.212,19.368,21.976,19.212,16.946,13.592,9.656,9.312,13.532,15.066,11.922,6.31,6.234,17.53912698,20.82704167,25.40295833,22.09604167,20.374625,21.7085,27.46054167,23.738875,24.65866667,21.85391667,25.39708333,24.355125,22.43491667,28.159125,23.2047446,24.07129167,23.80391667,22.23591667,24.84204167,27.92679166,22.40020833,23.04495833,20.74970834,13.93966667,17.14429166,19.80925,21.64533333,16.735125,13.446125,11.459375,24.59222222,26.59,31.334,28.968,24.988,27.644,33.732,29.39,30.256,28.656,33.576,31.412,29.19,34.51,29.022,30.866,28.444,28.832,30.588,33.632,26.588,30.566,28.512,17.288,23.9,26.734,28.946,21.61,20.912,17.034,6.949232804,14.72025,16.33433333,16.93125,15.10225,11.52591666,19.46675,17.37141667,19.62670833,13.27291667,16.63016667,15.75558333,13.73825,18.66645833,14.77608914,16.24379167,19.86829167,14.72525,18.93266667,19.83220833,18.89558333,17.557,13.56620833,11.05108333,11.239875,12.63691667,13.78454167,11.490875,4.266458333,4.94775,52.15155841,71.37291667,60.54083333,75.48708333,74.07833333,56.00333333,63.94166667,70.20958333,74.5725,61.69541667,62.51291667,61.99166667,60.9325,58.30291667,62.91858156,64.4225,80.14666667,66.78833333,72.83083333,63.74041667,81.86958334,73.7875,67.05333333,84.48375,71.47416667,67.31958333,64.29375,74.49875,58.88125,67.6475,409.1428571,254.05,320.7708333,259.5458333,240.4208333,334.1416666,311.5041667,262.3083333,217.0208333,304.0208333,314.4208333,305.1375,273.0166667,318.6958333,297.9779256,262.9875,171.2,282.0416667,234.8041667,175.9,151.9166667,217.1083333,230.7125,107.0583333,229.2791667,207.6,197.85,122.4375,165.1291667,121.5541667,0.169333333,8.2296,0.0508,11.684,4.2164,1.8796,0.8636,7.9248,2.3876,0.1524,0.7112,0.4064,0,0.254,0,0.0508,3.0988,0.8128,3.4544,4.572,18.3388,5.3848,0.254,13.5128,0,4.318,0.2032,33.782,0,2.4384,4.544906667,3.665728,2.861056,4.112768,4.112768,6.169152,6.616192,2.950464,5.006848,4.738624,3.57632,3.844544,4.380992,5.096256,3.486912,3.486912,3.755136,3.57632,2.68224,4.112768,3.665728,3.308096,4.112768,4.738624,3.397504,4.559808,3.486912,4.112768,3.665728,4.559808,1.016,41.148,0.254,58.42,21.082,9.398,4.318,39.624,11.938,0.762,3.556,2.032,0,1.27,0,0.254,15.494,4.064,17.272,22.86,91.694,26.924,1.27,67.564,0,21.59,1.016,168.91,0,12.192,0.166666667,0.8,0.2,0.6,0.2,0.2,0.4,0.4,0.6,0.2,0.4,0.2,0,0.2,0,0.2,0.6,0.2,0.4,0.6,0.8,0.8,0.2,0.6,0,0.4,0.2,0.6,0,0.4,56.96888889,56.25,100,74.95,57.44,54.135,100,87.17,86.805,63.305,93.28,78.89,62.42,100,56.59332414,93.25,76.03,75.495,87.055,100,64.5,82.67,61.06,17.36,33.03,60.975,82.72,41.94,18.055,8.17,15.56944444,15.72666667,15.85,15.94666667,16.02333333,16.07,16.09666667,16.10333333,16.07,16.02333333,15.95333333,15.85333333,15.73666667,15.6,15.44666667,15.28333333,15.10333333,14.91,14.71333333,14.51,14.29666667,14.08333333,13.86333333,13.65666667,13.43333333,13.20666667,12.98333333,12.76,12.53666667,12.30666667,270.1979167,244.4291667,311.9583333,263.275,252.6041667,328.8166667,293.4458333,264.2916667,212.8916667,285.525,312.0041667,291.9916666,282.9166667,308.925,297.1875,262.38125,164.8416666,260.0333333,266.8791667,242.2125,159.6625,214.7791667,195.5958333,140.9,224.8,196.4291667,208.4833333,123.8791667,150.0875,143.725,867.6666667,845.8,929.4,947.8,808.8,982.8,918.6,849.4,776.6,886.4,943.8,904,858.2,921.2,884,859.4,724,812,873.6,822.6,670,825.4,676.2,547.2,792.8,739.4,736,591.2,653,544.4
NEH2_2014,NEH2,2014,41.052978,-100.749467,100% Silt Loam,21.88,65.24,12.88,4.370945523,13.566,14.888,14.168,10.702,10.922,14.734,16.056,15.41,11.10545405,15.566,15.69933333,11.33333333,18.11111111,14.33333333,13.11111111,16.44444445,14.55555556,16,17.312,12.79939135,12,13.378,8.232,6.112,13,12.656,12.5275,NA,NA,13.85230735,18.11575,23.320125,19.941,15.39466667,17.92895833,21.80670833,21.52645833,21.88466667,20.68161363,24.01700543,21.5411,18.22222222,26.33333333,22.88888889,22.55555556,24.11111111,22.22222222,24.44444444,24.0198181,20.49202899,19.31204167,18.97575,12.83320833,13.73458333,18.65191667,20.62645833,18.68781082,NA,NA,21.02,23.656,31.056,27.69,21.59,24.79,29.722,28.278,28.976,27.09,31.566,27.32244445,24.88888889,34.66666667,31,31.77777778,31.66666667,29.44444444,32.66666667,30.97844444,26.422,26.934,25.208,18.732,22.188,25.702,29.688,25.985,NA,NA,3.852152432,12.03820833,11.38466667,13.88191667,10.69920833,10.862375,12.92258333,15.28783333,14.99908333,11.61239179,13.14140761,16.05058889,12.55555556,16.77777778,14.66666667,13.11111111,17.22222222,15.33333334,17.22222222,16.95694624,14.02576195,12.282625,11.00395833,8.114916666,8.162208334,9.864750001,11.43045833,9.251502016,NA,NA,56.58662825,71.03541667,51.96291667,71.43541667,77.1175,65.89083333,61.60333333,69.45333333,68.60875,59.08916667,54.27721014,71.61366529,69.65257162,56.24727044,60.10563879,55.41849706,65.4427576,65.05701307,64.22074943,66.11884047,69.91083333,67.75958333,63.48041667,78.2575,72.58875,62.4525,61.61333333,58.45366264,NA,NA,293.8189273,233.2875,376.3125,278.7916667,210.8166667,349.9458333,358.75,316.9958333,332.3916667,336.4416667,369.8538043,32.7,NA,NA,NA,NA,NA,NA,NA,235.1263441,249.1041667,241.9625,247.1708333,133.3083333,243.6708333,177.5666666,229.4833333,212.4716062,NA,NA,0.042333333,6.5024,0.1524,2.5908,23.5712,0.8128,5.334,1.9812,4.7244,0,1.27,0,0,0.1524,0,2.3876,2.0828,4.4704,0,1.4732,11.5316,0.3556,1.5748,3.4544,0,0.9652,0,2.0955,NA,NA,4.544906667,3.57632,2.771648,3.844544,4.649216,4.559808,3.665728,2.771648,3.665728,4.291584,3.308096,3.57632,3.57632,4.02336,3.218688,2.414016,3.218688,3.397504,3.486912,3.12928,3.397504,2.950464,3.665728,3.665728,3.665728,3.308096,3.397504,4.58216,NA,NA,0.254,32.512,0.762,12.954,117.856,4.064,26.67,9.906,23.622,0,6.35,0,0,0.762,0,11.938,10.414,22.352,0,7.366,57.658,1.778,7.874,17.272,0,4.826,0,8.382,0,0,0.166666667,0.6,0.2,0.4,0.6,0.2,0.6,0.4,0.4,0,0.2,0,0,0.2,0,0.4,0.2,0.2,0,0.6,0.8,0.6,0.2,0.6,0,0.4,0,0.4,0,0,16.17283657,43.055,90.25,60.31,30.73,39.28,77,74.06,66.245,51.92863514,84.11,68.66555556,46.66666667,93.05555556,80.83333333,90.55555556,100,73.33333334,100,87.115,48.05347837,47.335,51.605,23.94,20.75,59.505,73.165,37.025,0,0,15.57222222,15.73,15.85666667,15.96333333,16.04333333,16.10333333,16.13333333,16.14,16.12333333,16.07333333,16.00333333,15.90666667,15.79333333,15.66,15.51333333,15.33666667,15.16,14.96666667,14.77,14.56333333,14.35333333,14.13666667,13.91666667,13.69333333,13.47,13.24333333,13.01666667,12.81666667,NA,NA,283.1875,236.9666667,346.4541667,246.4708333,227.4291666,323.5583333,334.5875,294.8208333,312.9,312.025,329.7083334,293.5,256.7708333,294.1708333,311.7958333,287.6291667,290.3833333,286.55,278.55,229.325,234.2458333,239.4541667,250.0125,123.2791667,210.9916667,209.2958333,222.675,198.859375,NA,NA,904.6666667,807.2,977,930,837.4,985,980.4,930.2,915.4,945.8,939,909.2,809.6,913.2,933.4,910.8,874.8,892.6,874.2,849.6,817.4,821.6,850,530.8,764,753.6,767,735.25,NA,NA
NEH3_2014,NEH3,2014,41.16353,-101.99598,100% Loam,41.87,40.19,17.93,3.971666667,12.012,13.1,13.378,10.966,8.004694332,10.28296482,13.732,14.478,13.80022222,15.688,16.788,12.188,17.946,16.82,13.5,15,13.33333333,14.88888889,14.59955555,12.87513225,14.056,12.056,11.6,4.59,8.064786775,12,11.522,7.302,NA,12.15,17.45379167,21.73645833,20.27679167,16.210875,16.0000978,20.53818677,20.61291667,20.78620834,21.56276389,23.83158333,23.620875,17.55329167,25.99870833,24.25804167,21.42815278,22.77777778,21,23.88888889,24.82687923,21.54902359,19.53970833,20.09541667,18.32341667,9.905958333,16.86018306,18.755875,20.463875,12.541425,NA,20.0837037,23.566,30.688,29.334,23.434,23.268,28.334,28.124,27.89,25.47888889,22.77777778,21,23.88888889,29.978,33.478,29.95355556,30.66666667,29.22222222,33.11111111,32.46533333,29.232,26.344,29.5,25.58,16.48,26,26.702,30.056,19.288,NA,3.470296296,11.28091667,10.03166667,13.427125,10.96933333,10.58376788,11.19533735,13.0625,13.64929167,11.26852778,13.16125997,15.46833333,12.11416667,12.89383333,12.64854166,11.93365278,14.77777778,14.33333333,15.11111111,13.5843285,13.8613787,14.18279167,12.16283333,9.315208335,6.084375,10.86175834,8.610083332,9.389791667,6.039571667,NA,57.70914137,71.34208333,55.30083333,70.195,75.945,73.55458333,61.06833333,65.98125,67.55833333,55.26844168,56.2025,65.18375,74.42875,52.79833333,52.95125,58.99849127,61.02565804,65.81043839,58.11394944,52.10749436,66.88666667,74.22208333,65.94208333,61.51875,80.5725,72.8375,57.48583333,55.02791667,69.54125,NA,NA,NA,NA,NA,NA,NA,NA,NA,NA,NA,NA,NA,NA,NA,NA,NA,NA,NA,NA,NA,NA,NA,NA,NA,NA,NA,NA,NA,NA,NA,1.185333333,0.2032,0,1.8288,18.5928,2.0828,2.4892,9.906,8.636,0,0,0.7112,0.8636,0,0,2.032,0.8636,0.3556,0.1016,3.9624,2.54,2.9972,0.508,0.8128,1.1684,0,0.1016,0,1.3716,NA,3.054773333,3.397504,1.877568,3.039872,4.291584,4.380992,4.380992,3.308096,2.503424,3.039872,2.592832,3.397504,2.771648,3.039872,2.503424,2.145792,1.966976,2.145792,2.771648,1.78816,2.056384,2.68224,3.039872,2.056384,4.02336,2.2352,1.877568,3.12928,4.4704,NA,7.112,1.016,0,9.144,92.964,10.414,12.446,49.53,43.18,0,0,3.556,4.318,0,0,10.16,4.318,1.778,0.508,19.812,12.7,14.986,2.54,4.064,5.842,0,0.508,0,6.858,0,0.666666667,0.6,0,0.6,0.8,0.2,0.4,0.8,0.4,0,0,0.4,0.2,0,0,0.2,0.2,0.6,0.4,0.8,0.2,0.6,0.2,0.2,0.6,0,0.2,0,1,0,12.16611111,38.945,79.805,68.365,36,28.18173583,57.03741205,67.14,55.92,55.66777778,46.16444445,44.47,40.19222223,77.835,100,82.72,84.72222223,71.66666667,100,100,64.74283063,51,65.72,51.145,2.675,44.18696694,53.895,70.86,16.475,0,15.53888889,15.70333333,15.83,15.94,16.02666667,16.08,16.12,16.14,16.12,16.08333333,16.01333333,15.92666667,15.81666667,15.68666667,15.53333333,15.38,15.20333333,15.01333333,14.81666667,14.66,14.53,14.32,14.1,13.87666667,13.65666667,13.43,13.20666667,12.98,12.75666667,NA,277.6354167,257.8916667,326.65,294.8125,257.7583333,312.2791667,329.525,331.1958333,325.3583333,350.625,332.5375,298.1875,241.4416667,321.3333333,313.1625,291.6083333,286.2041667,293.6791667,284.8125,267.5958333,231.6541666,210.8416667,257.275,214.2125,191.1041667,220.3291667,198.5416667,194.1125,188.0541667,NA,884.5,885.6,948.2,951.6,920.2,959,988.4,983.2,969.6,990.2,974.2,951.8,819.4,935.2,952.2,927.4,912.8,913.8,888.6,889.6,841.4,785.8,854.4,794.2,683.6,768.6,704.8,683.2,746.2,NA
NYH1_2014,NYH1,2014,42.728765,-76.651654,100% Silt Loam,21.88,65.24,12.88,11.72333333,10.378,13.96985916,13.612,10.468,17.856,20.578,15.58,15.154,14.5,17.444,13.656,13.622,14.222,12.922,11.49,14.578,14.4,13.712,16.422,11.6,6.278,7.912,7.122,10.378,7.666,6.4,10.356,4.944,5.498,18.71104167,17.60770834,19.89378873,19.412,18.41266667,22.1545,25.24216667,20.74958333,20.829125,19.53020833,22.627,19.37741666,18.644875,19.13670833,19.13870833,16.60325,19.66804167,20.294625,19.38041667,21.85983333,17.483125,11.99566667,13.85408333,13.71025,17.1055,13.33591667,11.36675,15.800625,9.260708333,9.156916666,25.195,24.01,24.474,25.178,24.38,27.144,30.778,25.88,26.624,25.044,28.39,24.644,24.9,25.422,25.834,21.856,26.168,26.49,25.312,28.412,23.422,18.51,21.334,22.056,26.8,19.19,17.234,21.412,12.866,12.9,10.42465278,9.216666667,17.4467718,13.63166667,9.399166666,16.68,18.27041667,13.23291667,14.19875,14.93541667,16.97083333,13.97833333,14.55870833,15.94875,14.330625,12.36595833,16.73729167,15.69458333,15.59533333,17.78983333,13.04625,8.519958333,9.645291667,9.172416667,12.918875,7.345791667,4.691666667,10.80866667,5.738125,5.420208333,63.18263889,61.65208333,86.33708333,72.06708333,60.50916667,73.9225,66.95166667,64.7775,68.66416667,76.89666667,72.01291667,74.16458333,79.22,84.43458333,77.19333333,77.61791667,84.82875,77.1,80.48458333,79.58333333,77.03416667,82.2475,78.54791667,77.85791667,81.09541667,69.47666667,67.35791667,74.76208333,80.3125,79.525,291.8506945,268.925,146.875,249.5541667,333.4833333,243.9291667,260.7416667,257.4583333,265.3583333,232.6666667,243.2583333,238.8291667,80.61755951,NA,NA,NA,NA,NA,NA,NA,NA,NA,NA,NA,NA,NA,NA,NA,NA,NA,0.338666667,2.6416,1.5748,2.3368,0.2032,8.3312,3.4544,0.6604,1.2192,3.2512,0.508,7.9756,1.27,8.0772,2.7432,1.8796,7.366,0.0508,1.4732,5.6388,0.6096,4.064,1.1176,0.6604,0.4064,1.524,2.3368,3.1496,3.2004,0.8128,2.68224,2.2352,2.2352,2.414016,1.430528,2.503424,3.397504,3.755136,2.324608,2.771648,2.145792,2.68224,2.861056,1.698752,2.324608,3.218688,1.609344,2.056384,2.771648,2.950464,3.308096,1.966976,3.218688,2.145792,1.162304,3.755136,3.308096,3.665728,3.665728,3.755136,2.032,13.208,7.874,11.684,1.016,41.656,17.272,3.302,6.096,16.256,2.54,39.878,6.35,40.386,13.716,9.398,36.83,0.254,7.366,28.194,3.048,20.32,5.588,3.302,2.032,7.62,11.684,15.748,16.002,4.064,0.166666667,0.2,0.4,0.2,0.2,0.6,0.2,0.4,0.4,0.6,0.4,0.2,0.4,0.6,0.2,1,0.6,0.2,0.2,0.4,0.4,0.8,0.2,0.2,0.6,0.2,0.4,0.6,1,0.8,56.505,35.97,46.1096479,61.61,37.12,68.5,92.47,58.455,60.64,48.86,69.64,45.75,46.305,49.11,46.89,33.365,51.865,52.225,47.56,67.335,37.555,11.97,23.115,22.945,42.945,17.14,9.085,29.42,-5.475,-4.005,16.11666667,16.21,16.27666667,16.32,16.33,16.31,16.27333333,16.20333333,16.10333333,15.99,15.85,15.7,15.52333333,15.32666667,15.12666667,14.93,14.70333333,14.48333333,14.25333333,14.02,13.79,13.54666667,13.31,13.07333333,12.82666667,12.59333333,12.35666667,12.11666667,11.89,11.66333333,295.1284722,262.6375,172.5375,241.8458333,336.125,253.2583333,245.1291667,268.5,259.7583333,234.7458333,240.9791667,254.625,219.2354167,266.3958333,231.2208333,216.7041667,172.375,232.9791667,206.3916667,210.1375,165.5,183.8208333,146.925,211.8708333,181.3958333,125.8458333,139.4541667,108.0916667,62.83333333,92.64166667,903.5,831.6,662.4,793.4,957.4,850,861.2,848.4,821.4,851.4,861.8,818.4,801.8,850.2,781.8,786.4,686.4,799.4,768,715.8,628,731,653.2,740.8,693.6,597.8,576.6,522.2,351.8,448
NYH2_2014,NYH2,2014,42.73,-76.65,100% Silt Loam,21.88,65.24,12.88,10.62,13.068,11.37985916,13.566,12.792,16.156,19.1,15.724,15.556,17.2,14.61,14.254,14.122,15.822,11.576,13.778,12.18,15.568,13.236,16.998,13.2,9.488,5.888,9.666,9.522,10.934,6.99,5.912,9.278,5.346,16.84697917,19.3215,19.7454554,18.29429167,19.40583333,21.185375,24.765375,21.13870833,20.729875,21.76108333,19.9535,20.88766667,18.29545833,20.96691667,18.78216667,18.31670833,18.27104167,20.95933333,19.51395833,22.44691667,19.29866667,14.29770833,12.57916667,15.366375,16.65170833,16.47733333,12.22575,11.95916667,13.38975,8.698375,23.185,24.844,26.286,23.366,24.834,26.268,30.766,26.524,26.502,26.768,25.644,26.756,23.7,27.678,25.968,23.266,24.334,27.2,25.59,28.69,25.524,19.424,20.056,21.834,26.024,22.734,17.466,18.324,17.054,12.422,9.950347222,11.23,14.1830218,13.80333333,12.18291667,14.93291667,16.715,13.57291667,14.37166667,16.88708333,14.09791667,15.10666667,14.69875,17.21083333,14.02,13.68291667,14.55333333,17.32833333,14.33291667,18.64166667,14.5875,11.19208333,8.261666667,10.93625,11.95,12.63291667,4.544166667,6.807083333,10.15166667,5.914583333,68.69375,61.665,74.54166667,77.51291667,67.52,70.73,62.81083333,65.41916667,69.25,75.44416667,71.405,72.1575,81.66333333,81.41791667,77.14708333,76.38583333,80.4775,81.56541667,73.87916667,80.65708333,76.15208333,82.88708333,78.56125,76.84041667,77.53,80.19,61.59916667,73.43833333,82.45416667,84.04208333,259.8090278,253.1458333,217.2875,199.1708333,313.3583333,234.6625,309.9458333,274.8333334,253.425,206.15,247.0875,279.0625,191.7083333,236.5375,271.575,179.5625,192.075,221.1458333,226.7583333,193.3333333,202.0375,134.5791667,198.0458334,160.3041666,201.4458333,141.2041666,128.925,130.4708333,75.99166667,71.17083333,0.381,0.4064,2.6416,1.5748,2.54,8.3312,0,3.4544,0.6604,3.5052,1.016,0.4572,9.652,9.6012,0,4.826,3.2004,4.3688,0,6.1976,0,1.8288,2.286,1.524,0,1.778,1.9304,0.1016,4.6736,1.8288,2.2352,3.308096,1.78816,2.324608,1.966976,2.592832,3.218688,2.950464,2.68224,2.950464,2.145792,2.68224,2.861056,1.877568,1.78816,3.397504,2.2352,1.430528,2.771648,2.861056,2.771648,3.039872,2.056384,3.665728,1.251712,2.2352,4.4704,3.486912,3.57632,2.861056,2.286,2.032,13.208,7.874,12.7,41.656,0,17.272,3.302,17.526,5.08,2.286,48.26,48.006,0,24.13,16.002,21.844,0,30.988,0,9.144,11.43,7.62,0,8.89,9.652,0.508,23.368,9.144,0.166666667,0.2,0.2,0.4,0.4,0.6,0,0.2,0.4,0.8,0.4,0.2,0.6,0.6,0,0.4,0.6,0.4,0,0.4,0,0.4,0.4,0.4,0,0.6,0.4,0.2,0.8,0.6,41.415,50.53,44.1646479,51.245,49.785,56.06,91.22,59.145,59.95,66.115,50.635,57.58,44.555,58.75,43.86,42.61,41.285,56.92,47.065,70.025,51.225,22.28,14.86,28.75,38.865,34.17,11.14,10.59,15.83,-5.58,16.07777778,16.17666667,16.25333333,16.30333333,16.33,16.32333333,16.29333333,16.23333333,16.14666667,16.03666667,15.90333333,15.76666667,15.59666667,15.40666667,15.20666667,15.01,14.79666667,14.57,14.35,14.11,13.88,13.64666667,13.40333333,13.17,12.92333333,12.69,12.44666667,12.21333333,11.98,11.75333333,258.0763889,250.2041667,236.275,204.875,303.7458333,249.325,303.7625,267.8583333,254.7125,203.95,256.5083333,281.3541667,198.1104166,239.5458333,291.4958333,171.8125,209.6041667,230.5333333,193.9708333,224.4875,191.75,148.9041667,186.4666666,160.0083333,205.7083333,128.6458333,142.3291667,115.8291667,86.63333333,82.82083334,816.1666667,833.4,754,708.6,954.6,837.6,900,901.6,828.8,763.8,872.8,907.8,720.2,840.8,866.2,720,768,753.2,746.6,809.2,678.8,604,723.4,678.8,717.8,610.6,606.4,520.6,451,417.2
ONH1_2014,ONH1,2014,43.497025,-80.42696111,,23,46,31,6.869373727,11.378,10.378,8.434,13.176,11.722,10.946,15.412,16.522,13.056,11.612,10,14.278,11.8,9.812,12.378,10.878,10.044,11.566,12.78,12.432,12.81,10.358,5.534,3.656,5.176,9.668,4.674424297,2.376,6.39,13.64144529,18.68675,19.52266667,16.02,19.337375,18.49870833,19.20683333,21.3905,21.90995833,19.43895833,18.97933333,16.65083333,20.15979167,18.12308333,16.75925,18.79645833,18.83983333,15.09233333,18.45933333,19.76404167,19.55170833,19.53520833,16.15304167,10.5755,12.3295,12.9725,15.45341667,11.55286549,7.476666667,12.31,19.6,25.076,26.578,22.244,24.99,26.044,26.344,26.964,26.866,25.234,24.89,22.986,25.9,24.278,24.088,25.978,27.164,19.734,26.1,26.42,26.456,25.79,23.488,16.022,20.266,22.386,23.064,17.888,13.368,18.344,7.935584651,10.07729167,9.73075,7.132749999,13.61891667,12.643125,8.850458333,16.46808333,17.1635,12.53929167,13.3625,11.58204167,16.11129167,12.680375,12.96791802,13.98545834,14.31379167,10.93920833,15.1865,15.88533333,15.1245,16.06416667,13.27395833,7.552125,8.39275,8.378624999,12.04879167,9.133708243,3.107125,9.934666666,72.95868055,61.31708333,58.58333333,61.85958333,72.41166667,71.72666667,56.11666667,76.60958333,75.89333333,68.73083333,72.74,75.1975,80.06625,73.35833333,80.99125,77.12416667,78.37166667,78.3575,83.37083333,80.38125,78.36083333,82.78958333,85.40208333,83.795,80.22416667,77.73333333,84.24875,86.59841428,77.21541667,87.34625,218.2881944,302.7458333,305.8416667,274.4375,240.3166667,274.3916667,312.4083333,237.8,240.3,266.0833333,272.1916667,261.8208333,229.0666667,248.6875,227.3875,243.6833333,254.6625,185.3333333,201.6916667,215.5916667,206.625,180.0166667,160.9958333,135.3958333,200.3583333,198.6625,135.3,98.62777135,135.6583333,83.80416666,1.143,0,2.4892,0.9144,2.6416,0.8636,0.7112,2.54,1.27,16.0528,0.6604,1.9304,1.5748,16.4592,10.0076,0.9144,5.1308,0.3556,0.2032,0,3.81,13.9192,11.0744,1.016,4.8768,0,1.9812,5.4356,0.2032,3.556,2.980266667,3.039872,3.039872,2.145792,3.12928,2.950464,2.056384,1.877568,3.308096,3.844544,2.056384,2.2352,2.324608,2.771648,1.78816,1.609344,2.324608,4.02336,1.430528,2.503424,2.950464,2.861056,2.861056,1.966976,1.966976,1.877568,1.34112,4.380992,3.12928,2.503424,6.858,0,12.446,4.572,13.208,4.318,3.556,12.7,6.35,80.264,3.302,9.652,7.874,82.296,50.038,4.572,25.654,1.778,1.016,0,19.05,69.596,55.372,5.08,24.384,0,9.906,27.178,1.016,17.78,0.166666667,0,0.4,0.2,0.6,0.6,0.4,0.2,0.8,0.4,0.2,0.2,0.6,0.4,0.8,0.2,0.4,0.4,0.2,0,0.2,0.6,0.4,0.8,0.4,0,0.2,0.6,0.2,0.6,19.40812118,41.135,42.39,26.695,45.415,52.025,43.225,63.885,58.47,45.725,41.255,32.465,50.445,40.195,34.75,45.89,45.105,24.445,44.165,55.415,47.22,52.11,34.615,3.89,9.805,18.905,31.83,6.406060744,-10.64,11.835,15.91666667,16.07666667,16.19666667,16.28666667,16.36333333,16.4,16.41666667,16.4,16.35666667,16.28,16.18666667,16.06333333,15.91666667,15.75,15.57666667,15.39,15.18333333,14.97,14.74333333,14.52333333,14.27666667,14.04666667,13.8,13.56,13.31666667,13.07,12.82666667,12.58,12.33666667,12.09666667,226.9305556,310.1,307.7916667,283.0875,245.1291667,283.7833333,303.7666667,235.4583333,246.3,272.1166667,274.7041667,254.175,240.0166667,251.4125,232.15625,256.0458333,233.6833333,213.5041667,194.825,239.3291667,176.3666667,229.1375,135.3666667,162.625,183.225,218.4,125.6416667,98.59166667,157.25,60.07916667,741.5,917.4,946.2,806.8,836.6,903.2,922.8,750.4,870.2,918.6,883.6,888.4,809.8,825.4,825,821,774,763.4,792,785,641.8,810.8,590.2,689.6,714.2,731.8,478,545.8,636.2,323.2
ONH2_2014,ONH2,2014,42.45419722,-81.88311111,Loam,43,43,14,12.73833333,12.946,12.422,14.066,16.402,16.422,20.434,14.23,11.60291486,15.988,13.956,12.858,13.38,15.146,11.976,13.19,13.766,17.488,14.754,18.242,14.056,9.8,5.678,7.988,8.822,10.522,6.746,5.678,8.29,4.963333333,18.58326389,18.87816667,18.93125,19.78925,20.97,21.2745,24.5515,20.11158333,20.11252528,20.75025,19.74458333,20.07033333,18.56525,20.72116667,19.67975,18.0685,20.00766667,22.293,20.83866667,22.72108333,20.08375,14.30416667,11.87633333,14.95533333,16.47733333,14.722,10.514,11.35125,11.28225,8.740888888,24.01,24.488,24.934,25.7,26.276,26.432,29.278,25.8,25.434,25.576,25.712,26.234,24.066,27.466,28.078,23.79,26.612,29.178,27.568,27.69,26.4,19.644,19.166,21.578,25.644,18.878,14.734,18.278,15.62,12.57333333,8.569224435,9.065511036,9.615769994,9.758973242,11.50730747,12.43854637,14.97831173,9.617496208,12.29531346,12.14077369,11.28075159,11.38769675,10.89355888,12.97886236,11.2774757,10.22773542,12.24754312,14.44178258,12.33069549,14.90691379,12.21158428,8.543557658,6.148623269,7.917846421,9.032745545,8.846095634,3.815618417,5.319579225,5.980045487,3.608929856,66.86666667,68.22833333,70.45583333,67.51833333,71.435,76.00416667,73.23833333,65.24083333,80.33630435,76.00416667,76.86583333,74.55666667,79.55583333,81.715,76.34916667,79.27333333,80.5925,82.53,76.54166667,83.59,79.95666667,86.22416667,83.3,78.96666667,78.77833333,86.0675,76.6175,80.50166666,84.7225,81.62083333,287.4722222,283.25,255.2666667,318.5166667,259.0083333,265.6666667,319.575,308.325,232.0402174,260.85,263.7333333,285.8416667,257.7083333,214.5,299.4666667,230.3916667,238.6166667,221.6,239.5333333,193.2666667,233.075,122.5916667,188.9416666,201.1583333,210.6833333,110.5333333,126.3833334,122.7916666,93.46666666,77.35277778,0.381,1.524,2.1336,0.1016,6.4008,2.3368,1.3208,0,9.7536,4.9276,0.6096,5.9436,5.3848,2.3876,0,4.0132,1.2192,0,0.7112,13.1064,3.2004,10.7696,0.254,0.8128,0,6.4516,1.8796,3.2512,2.0828,0.423333333,1.937173333,2.592832,1.877568,2.503424,1.877568,1.78816,2.771648,2.145792,2.056384,1.966976,1.072896,1.609344,1.609344,0.804672,0.983488,1.877568,1.698752,1.162304,1.78816,1.877568,1.966976,2.145792,0.983488,2.2352,0.983488,2.2352,2.145792,1.877568,2.324608,2.2352,2.286,7.62,10.668,0.508,32.004,11.684,6.604,0,48.768,24.638,3.048,29.718,26.924,11.938,0,20.066,6.096,0,3.556,65.532,16.002,53.848,1.27,4.064,0,32.258,9.398,16.256,10.414,1.27,0.333333333,0.8,0.4,0.2,0.4,0.4,0.4,0,0.4,0.6,0.4,0.2,0.8,0.2,0,0.4,0.4,0,0.2,0.8,0.4,0.6,0.2,0.6,0,0.6,0.6,0.4,0.6,0.4,50.245,43.585,43.39,54.025,60.86,57.135,83.08,50.075,42.59228715,53.91,49.17,54.98,43.615,63.725,50.135,42.45,50.945,72.665,60.025,64.83,54.89,23.61,12.11,23.915,36.165,23.5,3.7,9.89,9.775,-3.695,16.025,16.14,16.21666667,16.26333333,16.29,16.28666667,16.25666667,16.19333333,16.10666667,16.00333333,15.87666667,15.72666667,15.56,15.38,15.19,14.98666667,14.77,14.55666667,14.33666667,14.09666667,13.87333333,13.64333333,13.4,13.16333333,12.93,12.68666667,12.45666667,12.22333333,11.99,11.81111111,290.0277778,279.9125,254.9833333,315.4875,254.6791667,267.1458333,298.1666667,311.3166667,227.0958333,263.3333333,257.15,280.9375,256.2166666,220.6791667,253.5125,248.2875,244.3666667,240.3583333,226.1791667,210.1791667,189.9083333,122.9,200.3833333,197.0333333,180.1666667,108.3333333,142.8666667,113.7458333,90.50833332,117.2777778,872.1666667,859.6,842,975,896.8,870.4,873.2,948.6,879.4,902.4,800.6,853.2,885.8,760.6,788,869,810.4,810.2,801.4,740.6,658.4,520.6,751,747,652,499.4,602.6,521.4,436.8,465.6666667
TXH1_2014,TXH1,2014,30.54684444,-96.43394444,100% Clay,19.61,17.19,63.19,2.129629629,6.555555555,8.111111112,8.111111113,10.55555556,13.59977778,13.62154474,9.532,12.322,11.422,17.034,16.588,10.744,18.468,15.37,17.478,20.524,19.022,21.946,22.704,22.456,24.4,22.956,23.244,22.88,17.5191582,21.856,22.9,23.612,23.478,7.777777778,13,13.66666667,15.55555556,15.77777778,19.89516667,21.23124051,16.25491667,18.410625,18.117125,23.45175,22.65295833,20.54708333,23.56441667,20.69170833,23.34666667,25.544,23.11283333,26.78266667,27.58091667,27.316875,28.647375,27.09008333,27.062,27.825625,27.78017713,28.82379167,26.09241667,28.96833333,29.56383333,13.14814815,19,19.33333333,22.66666667,20.55555556,25.544,26.146,23.242,25.178,24.922,29.988,28.5,29.668,28.724,25.712,29.712,31.232,28.132,32.622,32.51,32.844,33.668,32.6,31.71,34.666,34.922,35.976,30.99,34.844,36.212,4.074074074,9,8.333333335,6.777777778,8.777777778,12.70597222,14.42491667,8.704291667,13.03883333,11.92495833,16.47741667,11.770125,6.618041667,19.95654167,16.25508333,15.21058333,19.3105,20.36266667,22.702875,22.73075,22.219375,23.06066667,23.15758333,23.51845833,22.606875,21.92909244,21.29204167,22.900875,23.33179167,22.62583333,77.89364154,76.89111442,72.51789758,56.35834393,64.0883837,65.50244421,67.8375,68.07458333,74.33291667,71.07416667,69.11791667,58.14916666,47.69125,82.34666667,79.33375,64.74,70.93333333,86.61291667,80.12791666,76.74666667,76.12666667,73.65583333,80.6675,82.43,75.97166667,74.31840426,67.64625,83.89583333,74.13416667,69.84166667,NA,NA,NA,NA,NA,296.0588235,203.6846899,255.6166667,219.0458333,262.8875,268.4083333,267.875,323.8625,184.8708333,238.7416667,316.2333333,266.0666667,200.0291667,275.4125,270.6458333,313.6416667,310.5125,246.2833333,243.8416667,292.7083333,324.6695036,328.1375,186.1541667,299.85,288.375,1.947333333,4.572,0.9652,0,0,0.6096,0.5588,1.3208,3.302,0,0,5.08,0,4.572,17.9324,0,0,23.9268,0.254,3.2004,0.8636,5.4864,2.5908,3.3528,0.1524,3.81,0,22.1996,0,0.3048,4.619413333,3.486912,5.185664,4.291584,4.4704,5.006848,6.25856,4.649216,5.632704,3.12928,3.665728,5.185664,3.57632,5.81152,5.453888,5.81152,4.02336,2.592832,3.12928,4.649216,3.308096,5.453888,3.308096,5.632704,3.218688,3.308096,3.039872,3.039872,2.324608,3.039872,11.684,22.86,4.826,0,0,3.048,2.794,6.604,16.51,0,0,25.4,0,22.86,89.662,0,0,119.634,1.27,16.002,4.318,27.432,12.954,16.764,0.762,19.05,0,110.998,0,1.524,0.5,0.4,0.2,0,0,0.4,0.2,0.2,0.2,0,0,0,0,0.4,0.6,0,0,0.6,0.4,0.2,0.4,0.2,0.4,0.6,0.4,0.4,0,0.6,0,0.2,-14.16666666,13.88888889,18.61111112,26.94444445,27.77777778,47.85944445,54.88886184,31.935,43.75,40.86,73.33,69.86,75.255,85.755,56.065,71.585,100,77.28,100,94.39,95.525,100,100,95.97,100,100,100,89.725,100,100,12.61944444,12.78666667,12.94333333,13.09666667,13.15333333,13.41,13.56,13.71333333,13.86666667,14.01,14.15666667,14.29333333,14.41666667,14.54666667,14.66,14.77,14.86,14.94333333,15.01,15.06666667,15.10666667,15.12333333,15.12666667,15.11666667,15.08666667,15.04,14.98,14.90333333,14.81666667,14.71333333,129.7118056,166.2416667,184.1708333,266.2916667,171.6583333,223.1916667,192.7875,259.3833333,216.3,258.0666667,275.0041667,267.8458333,318.225,197.6208334,230.5291667,315.6916667,294.9666667,199.5625,276.2958333,268.4541667,304.6208333,305.825,247.3458334,259.3583334,285.7416667,308.825,316.0916667,202.55,302.8125,302.2041667,620,732.8,742,907.2,723.2,813,771.8,876.2,803.4,908,933.4,987.6,994.6,758.6,850.4,995,968.2,792.4,987.6,955.8,954.6,969.8,846.2,882.2,954.8,945.6,987.4,764.4,934,960.2
TXH2_2014,TXH2,2014,34.18466667,-101.9494444,"Loam, Sand Loam, Clay Loam (50/25/25)",45.46695,34.81025,19.7228,9.907407408,3.666666667,13.44444444,10,9.679555556,15.698,12.534,17.286,19.434,14.01,17.988,18.444,17.59,19.51,18.254,18.068,17.912,19.176,18.844,17.79,15.3,19.21,17.212,18.776,18.612,18.678,19.268,16.412,12.29,17.4,18.7962963,12.33333333,22.88888889,18.88888889,18.93643651,22.93010606,17.64491667,24.913,26.93391667,20.03866667,25.04458333,23.87216666,24.02081522,26.46191667,24.83091667,25.70466667,22.63933333,24.85466667,27.29475,22.32241667,24.0815,25.11958334,24.56266667,26.0305,26.04733333,25.81783333,26.21216667,20.62383333,15.69883334,20.063,27.87037037,21.22222222,32.33333333,27.22222222,27.54511111,30.844,23.1,32.044,33.89,26.8,33.2,29.69,31.168,32.822,31.744,32.268,28.656,31.798,35.356,27.422,33.034,32.412,33.312,33.956,34.166,34.932,33.522,25.82,20.524,24.212,-1.851851852,-5.333333333,-6.888888889,-2.666666666,-2.248855279,8.728590909,13.52691667,13.8645,14.2835,12.14233077,14.35708333,15.9715,16.23822464,16.60116667,14.47058333,13.17575,16.42058334,18.03733333,14.34383333,14.55383333,11.57983333,15.14308333,14.59208333,15.75416667,14.21191667,14.05391667,14.71566667,16.42575,13.29033333,18.162,24.79715572,29.91770738,13.54019252,24.70471365,30.65762186,52.82924242,80.615,55.33666667,51.6275,66.00416667,58.525,64.22666667,66.16894927,60.43416667,58.3075,49.48583333,71.72083333,69.19583333,50.075,64.14333333,50.4375,57.82083333,59.3525,58.13333333,51.8775,55.33666667,53.70166667,79.87583333,86.70666667,89.85333333,NA,NA,NA,NA,708.8083333,292.4076923,247.175,345.1416667,309.9166667,305.875,344.7666667,299.2833333,303.3844203,308.175,336.0666666,330.4916667,220.6833333,302.35,344.7583333,244.4,312.3083334,219.6833333,313.275,304.8666667,272.8166667,279.6,259.6583333,197.7583333,137.5333333,129.9583333,0.127,0,0,0.0508,2.032,9.1948,12.2936,0,6.1976,7.112,1.2192,2.2352,2.0828,6.6548,0,0,11.2776,0,0,0.0508,0,6.35,0.1524,0,0.6096,0,7.7724,0.9652,1.7272,19.9644,6.854613333,4.828032,5.275072,6.079744,4.4704,5.453888,3.665728,3.397504,5.275072,4.91744,5.543296,4.738624,5.275072,5.990336,3.755136,3.57632,3.12928,3.308096,2.503424,3.755136,2.324608,2.68224,2.861056,3.308096,3.397504,3.12928,4.559808,3.755136,3.844544,2.2352,0.762,0,0,0.254,10.16,45.974,61.468,0,30.988,35.56,6.096,11.176,10.414,33.274,0,0,56.388,0,0,0.254,0,31.75,0.762,0,3.048,0,38.862,4.826,8.636,99.822,0.5,0,0,0.2,0.4,0.4,0.6,0,0.4,0.4,0.4,0.2,0.2,0.4,0,0,0.8,0,0,0.2,0,0.2,0.2,0,0.2,0,0.2,0.6,0.4,0.8,77.77777778,23.88888889,88.33333334,55.55555556,61.22666667,87.775,39.085,92.25,92.89,57.385,91.945,78.225,78.34,83.53,92.78,100,73.835,84.805,100,68.415,100,92.47,100,100,100,100,92.28,60.025,32.035,54.03,14.38888889,14.56666667,14.70666667,14.84333333,14.97,15.08666667,15.18666667,15.27333333,15.34333333,15.38666667,15.42,15.43666667,15.43,15.41,15.35333333,15.29333333,15.21333333,15.11666667,15.00666667,14.88333333,14.74666667,14.60333333,14.45666667,14.3,14.14333333,13.97,13.80666667,13.63,13.46,13.28333333,308.7638889,331.1833333,353.0083333,325.9208333,348.0375,277.2416667,255.0416667,351.5041667,335.5458333,303.7333333,330.1541667,319.275,303.9583333,315.5958333,320.1791667,326.2875,243.6583333,302.1083333,342.525,258.0979167,318.8833333,264.7583333,311.0375,303.9041667,262.2416667,284.525,214.6333333,226.7208333,136.0416667,110.1291667,1002.166667,1038.6,1051.2,1022.4,1031.4,919,899.4,1019.2,1005.4,962.8,1015,987.4,965,974.8,969.8,1008.4,810.2,980.4,1007.6,891.6,971,963.2,968.4,958.2,922.2,943.6,755.8,888,638.6,595.2
WIH1_2014,WIH1,2014,43.05706111,-89.53098611,"99.8% Silt Loam, 0.2% Loam",21.92093,65.18801,12.89106,9.787592593,4.944,11.268,15.022,16.176,14.108,12.62,16.032,17.898,18.022,15.11,15.19,14.078,10.488,16.466,13.678,12.966,14.4,11.3795009,12.3,17.236,18.058,16.034,13.878,10.266,2.066,8.946,7.022,8.642,5.066,15.2907553,10.53145833,18.80291667,20.83325,22.35029167,19.16641667,17.92304167,22.28729167,21.521375,22.77154167,19.56541667,21.07379167,20.31083333,16.99341667,22.36679167,19.31616667,20.106,20.694,20.61107294,19.5515,22.70883333,22.42533334,21.51829167,20.17216667,16.21279167,9.176535461,15.04275,15.486,15.593375,9.181124999,20.13833333,15.088,25.534,27.154,28.034,24.488,23.024,27.5,26.344,27.722,24.534,26.5,25.532,23.544,28.224,24.812,27.978,28.302,27.668,27.376,28.812,26.9,27.322,26.178,22.644,15.622,22.122,24.842,23.19,14.288,8.641704353,0.063993348,6.163380334,9.779974324,10.33816065,8.497713459,6.842833387,10.74276093,14.26718197,13.95188587,11.91506361,11.79255962,11.50025146,8.464325192,12.99415774,11.06021175,10.78001363,12.15258624,10.64410109,10.65051319,14.85905787,14.91356446,13.72939174,11.99443307,9.165832555,4.154379057,7.964395718,7.147533895,8.071763454,3.209474017,68.34679351,56.48375,55.24708334,63.225,59.71958333,63.92625,60.18291667,62.25916667,85.91791667,76.19458333,81.27458333,72.90625,74.6225,73.36708333,72.23375,76.94916667,71.69375,77.27791667,67.76083333,73.16708333,83.35875,85.85666667,81.86458334,78.22,80.85166667,84.41453014,79.31166667,73.14458333,77.06166667,78.03041667,621.7192983,576.1248956,568.1103449,498.3931034,525.7103448,471.3862069,458.1586207,482.7931034,368.6551724,490.9586207,440.2551724,486.6137931,435.062069,473.1655172,509.2482759,413.1724138,515.537931,404.2344828,445.0275862,458.2689655,362.9172414,266.4344827,345.7586207,377.4068966,297.2551724,294.9310345,320.2206896,357.0206897,278.8137931,175.7103448,5.418666667,1.1684,0.5588,3.9116,14.0716,1.1176,0,9.8552,13.3096,0.254,16.4084,2.54,0.9144,0.6604,0,1.016,1.4224,2.6924,0,0,7.112,10.8204,4.5212,14.986,3.0988,2.0828,0.8128,0,0.1016,4.826,3.3528,3.665728,2.503424,2.771648,3.397504,2.592832,3.486912,4.112768,2.414016,3.933952,3.397504,3.039872,2.861056,2.145792,4.112768,3.039872,1.78816,1.609344,2.861056,2.324608,2.503424,2.592832,3.397504,3.12928,3.397504,1.78816,3.308096,1.34112,2.68224,3.12928,32.512,5.842,2.794,19.558,70.358,5.588,0,49.276,66.548,1.27,82.042,12.7,4.572,3.302,0,5.08,7.112,13.462,0,0,35.56,54.102,22.606,74.93,15.494,10.414,4.064,0,0.508,24.13,0.5,0.4,0.2,0.4,0.4,0.4,0,0.6,0.8,0.2,0.8,0.2,0.2,0.4,0,0.2,0.4,0.2,0,0,0.4,0.4,0.4,0.4,0.4,0.4,0.2,0,0.2,0.6,29.77777778,0.08,49.67,55.44,72.085,46.49,39.11,65.355,60.605,64.36,49.11,54.225,49.025,35.08,64.725,46.225,68.555,70.17,47.61875225,49.19,68.395,66.67,58.39,50.14,32.275,-5.78,27.67,29.66,29.58,-1.615,15.54166667,15.73333333,15.89,16.03666667,16.16,16.25,16.31333333,16.35333333,16.37333333,16.35333333,16.31333333,16.24,16.14333333,16.02333333,15.88333333,15.72,15.55,15.35333333,15.15333333,14.94333333,14.72,14.50333333,14.26,14.03666667,13.79,13.55333333,13.31,13.07,12.82333333,12.58666667,196.6388889,229.2375,316.8166667,265.4416667,306.9833333,275.575,266.225,270.8375,209.4166667,280.2666667,249.525,282.5375,256.6458333,271.35,288.7375,227.7708333,281.3125,242.6125,248.7916667,257.3291667,180.2416666,190.1416666,210.275,220.4125,127.1458333,206.0375,187.1666667,199.3333333,140.2458333,121.8791667,724.6666667,815.4,898,842.2,948.8,870,838.6,862.8,775.6,871.4,839.6,867.2,770.4,840.8,884.6,793.8,871,814.6,864,843.2,696.8,744,796.6,739.6,528.2,731.8,738.4,709.4,547.6,592.2
DEH1_2015,DEH1,2015,38.62932,-75.465731,100% Loamy Sand,81.87,12.58,5.548,7.019259259,14.278,15.722,16.544,9.778,18.324,17.078,13.554,19.722,20.954,21.098,17.232,16.88,21.1,19.046,19.25555556,21.11111111,18.33333333,20.88888889,20,18.11111111,16.44444444,20.66666667,15.24422222,16.19,17.732,19.124,13.20333333,NA,NA,15.00164213,19.97820833,20.987125,21.60204166,16.10058333,23.56375,21.06041667,18.12733333,25.82566666,25.50704167,26.43708333,22.70779167,22.649875,25.19725,24.55779167,23.43853409,26.55555555,24.77777778,26.55555556,25.11111111,22.77777778,23.44444444,25.88888889,23.02636905,23.228125,24.70279166,25.04154167,17.15538377,NA,NA,22.52925926,27.31,26.568,28.312,21.444,29.91,26,22.52,31.568,31.268,32.244,27.666,28.588,31.3,30.822,27.71022222,31.66666667,30.88888889,31.88888889,29.88888889,27.22222222,30,30.77777778,30.96822222,33.122,33.566,33,22.46333333,NA,NA,6.333065741,13.258,12.106625,15.42708333,7.82325,16.70845833,16.6785,14.84183333,18.69741667,20.75391667,21.2975,18.79820833,18.09641667,21.57591667,19.83316667,19.88861869,20.11111111,17.66666667,20.11111111,19.55555556,18.22222222,17,20.55555556,15.18903968,16.67829166,18.5345,19.60383333,14.75990132,NA,NA,61.65813216,69.26,61.45083333,70.97833333,63.29958333,67.52083333,79.37583333,83.34125,67.52291667,77.03208333,75.77541667,81.05875,78.19833333,81.86583333,77.11041667,81.09800252,67.89760969,65.05798404,68.02471576,71.44868435,75.83368016,67.18411376,72.99287285,64.68028567,71.42666667,73.03083333,75.9825,87.33717105,NA,NA,NA,NA,NA,NA,NA,NA,NA,NA,NA,NA,NA,NA,NA,NA,NA,NA,NA,NA,NA,NA,NA,NA,NA,NA,NA,NA,NA,NA,NA,NA,0,0,0,0,0,0.6096,0.2032,0.7112,1.4732,0.4572,0.1016,0,0,0,0,0,3.3528,2.9464,3.048,1.8288,5.2324,0,1.7272,1.0668,0,0,0,0,NA,NA,3.650826667,4.738624,4.559808,2.771648,2.950464,4.559808,4.828032,4.02336,3.308096,2.861056,3.218688,2.771648,2.861056,2.771648,1.966976,2.861056,2.145792,2.2352,2.414016,3.308096,2.771648,1.519936,2.950464,1.966976,2.2352,2.68224,2.414016,2.980266667,NA,NA,0,0,0,0,0,3.048,1.016,3.556,7.366,2.286,0.508,0,0,0,0,0,16.764,14.732,15.24,9.144,26.162,0,8.636,5.334,0,0,0,0,0,0,0,0,0,0,0,0.2,0.4,0.2,0.4,0.6,0.4,0,0,0,0,0,0.2,0.2,0.4,0.4,0.4,0,0.6,0.4,0,0,0,0,0,0,28.64555555,53.97,54.78,61.64,28.055,69.835,55.555,40.185,73.775,76.525,77.745,61.525,62.7,76.915,72.505,66.58111112,76.38888889,70.55555557,77.22222223,71.3888889,63.33333333,64.72222223,75.83333334,62.55500001,65.475,69.33,71.95,23.5,0,0,14.83333333,15.01666667,15.18333333,15.33333333,15.47,15.59,15.69333333,15.76666667,15.83,15.86666667,15.87333333,15.86,15.82333333,15.77,15.68666667,15.59333333,15.47,15.33666667,15.18333333,15.03,14.85666667,14.68666667,14.49333333,14.30666667,14.10666667,13.90666667,13.7,13.53888889,NA,NA,282.59375,278.775,267.9666667,259.15,288.225,304.6541667,222.9625,219.4708333,303.8791667,268.5041666,288.775,214.1208334,272.0875,260.9625,267.2875,248.8041667,286.6625,284.2,284.73125,231.7791667,227.2458333,291.0833333,241.7708333,255.2041667,214.875,240.35,172.475,226.2916667,NA,NA,878,924,882.2,839.2,854.8,925.8,691.2,720.6,920.2,903.2,881.8,752.8,845.4,833.4,871.6,770.6,905.2,906,907,741,773.2,898.2,822.8,860.8,782.8,788,677.2,798.6666667,NA,NA
GAH1_2015,GAH1,2015,31.505161,-83.55518,100% Loamy Sand,81.87,12.58,5.548,14,18.02,18.52,16.7,15.48,14.22,12.44,15.82,19.2,19.9,18.16,18.86,19.62,20.58,20.72,22.54,22.48,21.96,21.18,21.26,23.1,22.82,23.7,22.36,23.46,23.62,22.72,22.36,23.16,20,20.81197917,23.38708333,21.12875,20.12833333,21.98916667,17.52791667,20.65333333,23.81041667,25.22625,26.66,24.76333333,25.06541666,24.54083333,25.83958333,27.1925,29.39833333,27.74083333,25.9625,25.62375,27.705,29.13416667,28.70833333,28.69880435,28.82083334,27.86083333,28.12625,27.82416667,26.80583333,28.29333333,25.78267046,27.26666667,30.42,24.66,24.3,29.46,21.5,28.52,31.96,32.58,34.08,31.66,32.68,31.74,32.92,34.28,37.52,35.62,32.32,33.18,35.5,36.96,36.8,36.28,37.12,35.66,34.72,35.14,34.18,35.98,33.75,12.37916667,18.23833333,19.97791667,17.38333333,14.59791667,13.32041667,11.86916667,15.705,17.54041667,18.9775,16.98166667,18.91333333,20.25708333,20.70291667,21.22958333,21.98833333,22.44291667,22.34,22.0325,22.06166667,22.995,23.7,23.37070652,22.19208333,23.55708333,23.215,22.01125,22.64125,23.16166667,18.50804924,63.13940972,76.7925,93.78,86.53375,67.675,80.41625,63.22333333,66.97875,66.42416667,66.19083333,65.74708333,72.81416667,80.03916667,76.7125,73.95291667,68.67541667,76.35458334,82.48,82.56958333,75.565,73.53083333,77.65333333,75.23197695,72.47541667,80.39166667,77.76583333,74.28958333,80.55208333,77.51125,69.04460228,302.9181473,246.8236266,99.61050725,165.3368064,312.7552657,190.8989954,331.358381,324.5828865,280.5368698,310.3077667,287.1840464,288.9318262,250.6041667,244.4208333,314.8833333,317.1833333,261.7583334,216.8625,231.0818262,307.9125,298.275,281.7429348,281.6746184,301.7458333,250.1171986,262.6734929,263.098119,231.980303,256.4615248,319.7670455,0,4.68,6.34,9.14,3.8,5.64,0,0,0,0,0.98,0.68,5.62,3.38,0.98,0,6.24,4.56,7.2,2.4,6.62,3.82,2.24,0.44,8.46,7.56,7.7,2.6,3.72,0,2.309706667,1.162304,1.430528,2.056384,1.877568,1.966976,1.072896,0.983488,1.78816,1.877568,2.68224,1.162304,0.983488,1.34112,0.804672,1.430528,1.78816,2.145792,2.414016,0.89408,1.78816,1.072896,2.324608,0.983488,1.162304,1.966976,1.34112,0.983488,0.804672,1.78816,0,23.4,31.7,45.7,19,28.2,0,0,0,0,4.9,3.4,28.1,16.9,4.9,0,31.2,22.8,36,12,33.1,19.1,11.2,2.2,42.3,37.8,38.5,13,18.6,0,0,0.4,1,0.6,0.4,0.4,0,0,0,0,0.2,0.4,0.8,0.4,0.4,0,0.6,0.8,0.8,0.2,0.4,0.4,0.6,0.4,0.6,0.4,0.2,0.4,0.4,0,63.8,68.25,57.8,52.5,62.05,39.3,52.4,64.55,73,74.75,70.1,72.15,74.05,76.45,76.8,81.35,81.2,79.9,77.95,78.15,82.75,82.05,84.25,80.9,83.65,84.05,81.8,80.9,82.9,30,13.58333333,13.75666667,13.91333333,14.06333333,14.21,14.35333333,14.48333333,14.61,14.73,14.84,14.93333333,15.02,15.08666667,15.13666667,15.17333333,15.19666667,15.19333333,15.18666667,15.15,15.09666667,15.03,14.95333333,14.86,14.75666667,14.63666667,14.51666667,14.37666667,14.24,14.10333333,14.00833333,240.9409722,225.425,131.1166667,173.4916667,276.9125,205.5833333,316.3708333,323.9958333,279.6583333,319.175,301.1958333,299.7916667,272.5708333,269.3,319.1166667,327.4416667,280.1166667,231.375,250.4666667,299.5958333,297.0125,286.625,292.575,300.1916667,275.4729167,254.9958333,275.1958333,238.7416667,265.325,302.7708333,901.1666667,859.8,543.8,760.8,967.4,764.4,1015,993.2,914.8,986.4,940.6,951,939.2,943.4,978.6,982.2,951.6,795.6,908.6,953.8,945.8,911,955.2,947.8,953.2,912.4,948,890.8,919.6,955.5
IAH1_2015,IAH1,2015,41.99762,-93.69622,"57.6% Loam, 40.3% Clay Loam, 2.1% Silty Loam",37.87623,38.22423,23.89954,13.49166667,8.566,8.134,10.608,14.756,10.388,16.658,17.998,15.234,16.612,15.798,13.164,13.81,18.934,19.754,15.178,19.812,15.9,15.4,15.744,18.378,12.99,10.278,16.4,20.398,12.444,14.078,10.332,13.256,8.41,17.50443452,13.33525,14.04854167,17.47854167,19.18691667,17.71579167,23.18479167,21.6755,20.984125,21.07541667,20.74058333,19.63722283,19.788625,24.71283333,24.63045833,21.60975,23.80275,23.45408333,21.510625,22.05720833,23.17695833,18.664375,16.64666666,21.93929167,26.357375,18.22145833,20.80708333,16.996875,20.06066667,14.7780754,22.04666667,19.044,19.19,24.256,24.274,24.878,29.678,25.498,26.178,26.144,26.098,25.866,25.156,30.8,30.364,28.854,29.014,31.266,28.266,29.366,29.654,24.644,23.936,27.932,33.466,25.2,28.178,24.712,27.744,21.53666667,14.29755952,7.385791667,7.773791665,8.442291667,14.47679167,10.00141667,14.44425,17.141625,16.14575,17.87741667,17.39566667,14.16947645,15.40933333,20.325125,21.30783333,16.78308333,21.05125,18.82095833,17.665875,18.175125,20.153,14.11358333,12.531625,19.41004167,21.08958333,12.77791667,13.80816667,11.164375,12.390625,9.888065478,82.97549603,71.10833333,68.3975,62.71333333,77.0975,64.9325,61.615,80.04416667,76.44208333,83.63083333,83.09083333,74.00684397,78.035,78.40416667,83.20041667,77.02125,86.05875,77.73958334,80.60208333,81.35458333,85.19375,77.36708333,80.41083333,86.92666667,75.00583333,74.93166667,67.98041667,73,65.735,77.26547619,171.1820437,201.8708333,216.5541667,235.325,207.7083333,305.0625,286.9666667,149.6291667,271.7541667,176.3791667,211.1458333,268.7588652,227.3416667,271.3625,210.5666667,242.0333333,197.4458333,292.7208333,192.5458333,231.5916667,182.0541667,226.0333333,201.3041667,157.7583333,222.9875,200.8333333,189.4291667,164.4791667,169.3041667,131.0912698,3.175,2.3876,1.778,4.4704,5.6896,0,6.2992,16.3068,7.62,15.6972,0.8636,0,4.6736,0.1016,2.9972,2.7432,14.6304,0,0.3048,5.9436,5.08,0.7112,6.5024,0.0508,1.6256,0.4064,6.0452,6.7564,0,3.386666667,4.91744,5.543296,5.81152,4.112768,4.4704,3.486912,4.02336,3.039872,3.218688,3.397504,2.68224,2.2352,3.397504,3.486912,2.592832,2.503424,2.950464,3.039872,1.966976,2.68224,2.414016,5.185664,3.12928,2.950464,3.397504,2.950464,5.185664,3.397504,2.2352,3.278293333,19.05,11.938,8.89,22.352,28.448,0,31.496,81.534,38.1,78.486,4.318,0,23.368,0.508,14.986,13.716,73.152,0,1.524,29.718,25.4,3.556,32.512,0.254,8.128,2.032,30.226,33.782,0,10.16,0.833333333,0.2,0.4,0.4,0.6,0,0.2,0.8,0.6,0.8,0.8,0,0.2,0.2,0.6,0.2,0.8,0,0.2,0.4,0.2,0.6,0.2,0.2,0.4,0.6,0.2,0.4,0,0.2,46.615,19.025,18.31,37.16,47.575,37.75,63.59,57.02,53.53,56.89,54.74,47.575,47.415,69.865,70.41,59.745,70.535,64.11,58.11,61.72,65.11,44.085,35.535,59.385,75.995,44.11,55.445,37.61,52.5,14.42,15.3,15.5,15.66666667,15.81333333,15.94333333,16.05666667,16.14,16.2,16.24333333,16.24333333,16.22,16.18,16.10666667,16.01,15.89333333,15.75333333,15.6,15.42,15.24,15.04333333,14.84666667,14.63666667,14.41,14.18333333,13.96,13.73333333,13.50666667,13.26666667,13.03,12.85,203.5034722,199.45,200.7291667,246.6791667,210.975,288.3041667,292.45,183.8958333,272.4875,229.0125,262.3666666,269.65,248.3333333,308.9541667,258.5833334,286.6791667,204.5208333,302.0666667,225.025,279.7166667,168.7458333,285.1041667,169.3958333,229.8416667,214.3166666,237.5375,172.4625,191.3041667,168.2208333,215.6041667,747,670.4,753.8,780,777.2,870.4,862.2,634,837.8,830.4,856.4,823,761.2,904.4,806.6,902.2,718.2,896.2,765.4,865.6,631.8,880.8,587.6,729,759.6,803.2,703.2,678.8,659.2,744
IAH3_2015,IAH3,2015,41.97589,-92.24096,100% Silty Clay Loam,10,57,33,15.205,9.61,10.266,10.456,15.156,10.7,16.032,20.234,17.19,17.478,16.168,14.922,15.478,19.542,20.566,15.544,20.81,15.732,15.766,16.392,18.378,13.466,10.912,17.766,20.432,13.11,13.622,9.668,12.556,NA,19.30159444,14.61945833,15.04216667,18.122375,20.06195834,17.53283333,22.99675,23.85291667,21.81220834,22.20166667,20.83333333,20.664625,20.37654167,25.00166667,25.01670124,22.24158333,25.14975,23.88254167,22.25529167,22.81954166,23.76483333,19.383,17.53795833,23.01295833,26.395125,19.53229167,21.25945833,17.4665,19.39135057,NA,24.35333333,20.122,20.312,25.096,24.966,24.422,29.766,28.646,27.61,27.6,26,26.71,25.388,30.734,30.522,28.844,31.2,31.69,28.954,29.752,30.71,25.036,24.834,29.996,33.934,27.602,29.724,26.202,28.464,NA,15.23029028,8.001333333,9.470541667,10.003625,15.50570833,11.25266667,16.137375,19.98304167,18.0535,18.77504167,17.982625,15.474875,16.38841667,21.06758334,22.04038121,18.02016667,22.05291667,18.10095834,17.97416667,18.787375,20.40520833,14.37958333,12.62875,19.661,20.37754167,13.96620833,12.95483333,11.78708333,12.37538506,NA,79.90120833,68.24208333,71.49875,66.04583333,77.89583333,69.66416667,69.18666667,80.79666667,80.98375,82.74583333,85.26666667,74.85041667,79.91125,80.51625,84.70958333,79.39958333,84.50208333,73.18375,78.86708334,80.45208333,83.46375,75.39625,76.74958333,83.1725,72.76458333,75.02125,63.19791667,75.13708333,69.46402299,NA,197.5651389,239.975,222.9458333,275.7833333,225.8333333,291.5541667,275.5791667,187.9333333,265.5041667,212.2833333,188.1083333,237,175.4916667,183.5291667,150.7041667,146.4333333,195.8791667,278.1041667,184.55,193.9333333,195.1875,241.5333333,221.8083333,164.4166667,231.0125,205.2875,222.3958333,186.4789855,186.7978448,NA,3.725333333,1.6256,2.032,8.5344,3.5052,0,2.5908,16.8656,11.3792,9.8044,11.8872,0.0508,3.5052,6.7564,5.6388,0.4064,3.9116,0,0.1524,12.7,6.2484,1.5748,0.0508,0.0508,2.6416,1.8796,1.1176,8.2804,0,NA,4.4704,4.559808,4.738624,2.68224,3.039872,2.771648,3.308096,2.950464,2.056384,2.503424,1.519936,1.519936,2.503424,2.414016,2.2352,1.519936,2.056384,2.414016,1.34112,1.698752,1.34112,3.933952,2.324608,1.877568,2.324608,2.056384,4.02336,2.503424,2.145792,NA,22.352,8.128,10.16,42.672,17.526,0,12.954,84.328,56.896,49.022,59.436,0.254,17.526,33.782,28.194,2.032,19.558,0,0.762,63.5,31.242,7.874,0.254,0.254,13.208,9.398,5.588,41.402,0,0,0.666666667,0.2,0.8,0.6,0.6,0,0.2,1,0.6,0.4,0.8,0.2,0.6,0.2,0.6,0.4,0.8,0,0.2,0.2,0.6,0.2,0.2,0.2,0.2,0.6,0.2,0.2,0,0,58.675,24.33,26.445,38.88,50.305,37.805,62.55,70.06,61.53,62.555,55.42,54.08,52.165,71.575,73.97,60.915,76.83,64.33,61.05,65.03,69.415,46.255,39.365,66.825,76.08,50.585,56.14,39.675,52.55,0,15.29444444,15.48333333,15.65,15.81,15.94333333,16.05,16.13666667,16.19666667,16.22666667,16.24,16.21333333,16.17666667,16.10333333,16.00333333,15.89,15.75333333,15.6,15.42666667,15.24333333,15.05,14.84,14.62,14.41,14.19,13.96666667,13.73666667,13.49333333,13.26333333,13.03666667,NA,192.2291667,221.7208334,222.1125,265.6125,219.1416667,315.3958333,297.075,175.2375,274.9166667,186.0083333,216.2166667,290.2083333,254.9166667,275.1583333,247.1708333,261.0375,232.4291667,310.50625,201.4083333,282.1666667,185.3416667,285.625,187.1708333,228.7458333,221.4208333,246.1625,170.8,219.9166667,188.8458333,NA,686.1666667,726.4,779,890.4,767.6,927.8,921.8,641.8,856.8,736.2,723.4,885,852.2,917,796.4,866.6,836.2,912.2,744.6,887.4,623.2,888.4,637.8,766.2,758.8,820.8,660.2,745.8,701.6,NA
IAH4_2015,IAH4,2015,41.19938,-91.49214,100% Silty Clay Loam,10,57,33,14.70333333,8.342,9.532,11.1,14.076,11.91,17.266,17.922,15.234,16.634,16.712,13.668,13.354,19.42,19.632,15.388,19.944,16.454,17.134,16.666,17.4,12.578,10.798,16.512,19.978,12.322,14.214,10.712,14.302,6.622,18.00246528,13.322875,13.33495833,17.45025,18.52229167,18.28266666,23.61266667,21.56345833,21.140875,22.231,21.59466667,19.79370834,20.03591667,25.43304167,25.15591667,22.5068289,23.990875,23.60758333,22.538875,22.55275,22.64566667,18.02941667,16.41029167,21.665,25.28354167,18.14420833,20.54591667,16.70845833,19.54225,14.37379166,22.575,19.41,18.368,23.632,23.344,24.08,29.61,25.698,26.076,28.076,26.702,26.38,26.766,32.578,32,31.046,29.522,31.734,30.668,30.178,28.864,24.944,23.644,28.466,33.732,26.12,29.1,25.366,27.968,23.726,13.91323611,7.337583335,7.9855,9.281166668,14.29375,10.75634131,14.39441667,16.55858333,15.89154167,17.25775,17.531625,14.88958334,15.89645833,20.94775,21.117875,17.57019858,20.89575,17.71854167,18.82170833,18.42004167,19.567375,13.71166667,12.60241667,19.09845833,21.689625,12.96833333,15.2545,12.61341667,14.750875,6.866874999,78.71715278,71.845,71.69916667,65.16541667,78.81291667,65.46458333,60.29916667,78.38583333,74.54333333,76.175,79.76916667,76.01708333,79.47958333,78.58833333,80.41958333,77.10583333,85.23041667,72.58416667,81.62125,80.0775,84.85958334,78.51708333,81.87541667,86.86625,82.57916667,75.98791667,75.02916667,80.39083333,77.865,66.65666667,163.3319444,190.4833333,191.7,222.1958333,191.5958333,277.6625,286.9,160.4875,271.7875,227.3666667,256.2291667,234.8833333,238.4875,285.0541667,166.4,212.4666667,148.3541667,238.6666667,165.3208333,182.4916667,146.8708333,142.45,132.3708333,112.0625,186.8333333,187.4791667,170.4416667,146.5083333,120.8666667,166.8,1.651,4.0132,1.9812,6.7056,5.4864,0.508,4.318,7.9756,2.8956,15.6972,2.032,0,8.89,2.5908,6.0452,0.8128,18.3896,0.2032,0.254,22.3012,10.1092,4.3688,9.8552,3.9624,6.9088,0.1524,4.5212,2.032,0.4572,4.2164,4.24688,5.36448,5.275072,3.57632,3.844544,3.397504,3.57632,2.950464,3.57632,3.039872,3.308096,2.414016,3.039872,2.503424,2.68224,2.056384,2.2352,3.039872,1.877568,2.592832,2.056384,4.380992,2.68224,1.698752,2.2352,2.503424,4.02336,2.592832,2.414016,3.844544,9.906,20.066,9.906,33.528,27.432,2.54,21.59,39.878,14.478,78.486,10.16,0,44.45,12.954,30.226,4.064,91.948,1.016,1.27,111.506,50.546,21.844,49.276,19.812,34.544,0.762,22.606,10.16,2.286,21.082,0.5,0.4,0.6,0.6,0.2,0.2,0.2,0.6,0.2,0.4,0.6,0,0.2,0.2,0.4,0.2,0.6,0.2,0.2,0.4,0.4,0.4,0.4,0.2,0.4,0.4,0.2,0.6,0.2,0.4,51.835,19.38,19.75,36.83,43.55,39.975,64.775,57.8,53.275,60.945,58.535,50.12,49.745,73.19,73.245,62.14,70.36,66.05,67.055,65.525,63.025,43.805,36.105,60.03,74.945,46.105,56.895,40.195,55.175,25.84,15.30277778,15.5,15.66666667,15.81333333,15.94666667,16.06,16.14333333,16.21333333,16.24333333,16.24666667,16.22333333,16.18333333,16.11,16.01333333,15.89666667,15.75666667,15.6,15.42333333,15.24,15.04666667,14.84666667,14.63666667,14.41,14.18333333,13.96,13.73666667,13.50666667,13.26666667,13.03,12.80333333,201.25,237.8583333,239.1708333,271.7375,231.3,299.4,281.8375,188.3833333,267.3,226.325,214.8458333,289.6583333,234.4666667,290.3708333,232.2458333,264.9416667,254.7166667,297.3854167,217.925,285.9875,210.5791667,286.4416667,191.6083333,225.8583334,219.9416667,243.1666667,177.7041667,218.6916667,189.2708333,202.2083333,725.5,830.8,821.6,868,818.2,926.6,861.8,696.2,838,840.6,742,878.8,759,926.6,820.4,849,845.2,866.6,801.8,896,746.4,893.2,629.4,769.4,760.6,807.6,662.8,761.2,689.6,719.6
ILH1_2015,ILH1,2015,40.059337,-88.234116,"64.2% Silt Loam, 35.8% Silty Clay Loam",17.62757,62.28886,20.08357,7.94462963,15.844,10.632,14.18,10.946,17.512,10.334,14.8,19.668,19.91,19.178,15.866,16.21,13.512,17.9,19.1,16.634,18.1,17.022,13.888,17.522,16.564,13.666,11.356,15.724,17.954,15.824,8.256,11.434,10.366,15.75511774,22.21525,15.89208334,19.63879167,16.99870833,22.74508333,16.02829167,21.77829167,25.22566667,23.502875,23.54529167,20.543375,20.97822429,20.11441667,22.37308333,24.99779167,22.943625,24.23033333,24.44041667,22.35220834,23.22233333,23.89841667,20.17941667,18.397625,22.07920833,25.703625,21.456375,16.81529167,18.6,19.15504167,23.08389445,29.192,21.124,25.27,22.676,28.52,21.132,28.988,30.656,27.722,27.59,24.934,26.666,25.988,27.766,30.678,29.356,31.586,31.122,29.446,30.022,31.688,27.556,26.022,30,34.688,29.702,26.232,26.432,28.934,4.825783476,13.40845833,10.37804167,14.38879167,6.12301389,15.52470833,12.78479167,16.20516667,19.49195833,20.61104167,19.973375,17.26466667,16.97458422,16.68754167,20.112,20.82825,18.25595833,20.81675,17.664375,16.31979167,18.87820833,18.4045,15.36479166,12.37954167,17.879625,19.018375,17.14075,8.789,12.70316667,10.24620833,51.90974599,64.05666666,72.01,73.87916667,53.52030555,67.36875,83.19166667,73.36916667,72.3725,84.38583333,81.66875,83.2475,79.16039893,82.96958334,88.04666667,78.91083333,78.12,83.2875,69.155,72.25875,79.48541667,75.16208333,77.65416667,72.48041667,79.73458333,71.40666667,80.48791667,66.40041667,73.36916666,62.6025,241.4962607,221.1291667,221.6041667,243.8125,255.15,249.75,211.686413,253.9666666,267.5375,204.6208333,222.4083333,194.1291667,225.5375,212.3875,179.6708333,269.5708333,262.3916667,228.7916667,295.5916667,285.5958333,228.7041667,268.15,211.1,238.55,160.7125,229.3666666,168.5791667,228.8291667,175.5916667,204.8833333,0.635,1.8288,3.0988,1.1684,0.2032,0.1524,5.2324,5.0292,5.7404,1.778,1.1176,11.0744,0.1524,4.8768,1.1684,0,0.2032,0.4572,0.1016,0.254,0.3556,0.0508,0.1524,0.0508,0.1016,0,0,0,1.9812,0.1016,4.225148889,4.91744,5.185664,6.079744,4.4704,6.7056,4.828032,4.112768,4.380992,4.202176,4.559808,3.397504,3.218688,2.503424,2.324608,3.57632,2.503424,1.877568,2.324608,3.12928,2.324608,1.609344,3.308096,2.950464,2.056384,2.503424,2.68224,3.486912,3.755136,2.861056,3.81,9.144,15.494,5.842,1.016,0.762,26.162,25.146,28.702,8.89,5.588,55.372,0.762,24.384,5.842,0,1.016,2.286,0.508,1.27,1.778,0.254,0.762,0.254,0.508,0,0,0,9.906,0.508,0.333333333,0.4,0.6,0.4,0.2,0.4,0.4,0.4,0.4,0.8,0.6,0.8,0.4,0.4,0.6,0,0.6,0.4,0.4,0.2,0.4,0.2,0.4,0.2,0.2,0,0,0,0.8,0.2,37.25223889,61.92,29.39,48.625,34.055,64.665,28.665,58.165,74.115,69.08,66.81,52,57.19,48.585,62.36,71,64.78,70.165,67.555,57.695,67.695,66.16,53.055,43.445,62.255,69.885,59.535,36.22,44.47,48.14,14.93611111,15.13333333,15.28666667,15.45,15.6,15.72666667,15.82666667,15.91333333,15.97666667,16.01666667,16.02666667,16.01,15.98,15.91333333,15.82666667,15.72333333,15.59666667,15.46,15.3,15.13,14.95666667,14.76666667,14.56333333,14.36333333,14.16333333,13.95,13.73,13.51333333,13.30666667,13.08333333,280.5798611,232.5083333,250.6333333,270.0375,267.7375,259.9875,229.7791667,282.4333333,288.8041667,227.7,253.55,211.7166667,257.4166667,238.6333334,219.1666667,286.7958333,273.1333333,246.8041667,302.4625,269.8708333,267.425,238.1916667,226.1833333,256.7291667,200.4,232.4125,167.8333333,245.4458333,203.1333333,201.7833333,911.3333333,809.6,880.2,895.8,869,918.2,721,894.2,882.2,800.8,819,763.4,864.6,778.4,789.4,867,863.4,824.6,905.4,843.8,905,839.8,838.4,864,727.8,791.2,667.4,816.8,778.2,754.8
INH1_2015,INH1,2015,40.47666,-87.0004,"61% Silty Clay Loam, 39% Silt Loam",14.63357,60.21286,25.1537,14.23962963,9.844,17.48,10.51,14.888,19.832,20.342,19.244,16.108,15.976,13.998,17.666,17.944,18.368,18.944,16.944,14.844,17.276,17.378,14.968,12.71,17.824,18.998,16.956,10.222,11.11,10.022,13.476,9.498,7.388444445,19.30451188,15.99741667,22.87958333,16.07604167,21.141875,25.01754167,23.64808333,23.34625,20.806875,20.186,21.14879167,21.692625,23.75833333,23.956625,25.00650354,24.71425,22.84825,22.95841667,23.887875,21.14429167,19.45554167,23.21391666,25.7093289,22.22366667,17.527,18.77104167,18.44120833,18.39808333,13.88,14.5541362,23.85259259,22.846,28.378,21.21,27.8,31.278,27.766,27.042,25.136,25.676,26.888,26.978,29.846,30.08,32.09,32.442,31.056,29.632,32.288,27.756,26.31,30.322,34.344,29.302,26.344,26.544,28.522,24.98,20.81,22.91066667,13.7397655,5.161708334,15.7485,12.43608333,15.31383333,18.52116667,20.385,19.60266667,16.559875,16.18741667,16.46908333,18.88925,20.08870833,18.803,20.44548759,17.64166666,15.54016667,18.44029167,18.41604167,15.30916667,12.918875,17.94108333,18.71390514,17.15183333,8.646708334,12.15358333,10.449,11.69391667,9.052208333,9.407189965,71.73790814,53.37416667,66.55875,81.3075,71.93083333,69.72041667,82.6125,81.12708333,78.84208333,79.005,77.7,85.44541667,81.0175,76.44875,78.08416667,68.32375,67.65541667,78.36125,74.54958333,73.27125,68.85208333,74.93666667,69.2245656,76.20958333,62.06416667,70.425,66.17,68.07666667,76.15166667,72.93489909,192.7161765,246.7208333,242.8208333,220.225,248.3875,258.9708333,209.8916667,220.3041667,211.8208333,226.5333333,222.2666667,203.3666667,243.0083333,269.2916667,236.3541667,293.1291667,294.4208333,206.525,260.3458333,250.8583333,230.85,219.7375,223.5126773,169.7166667,232.8625,205.05,214.0916667,169.4916667,129.7291667,184.7419355,2.54,0.1016,1.1176,4.7752,7.0612,4.3688,5.9436,5.1816,4.9784,6.5532,2.9972,14.1224,9.2456,1.2192,0.8128,0.3556,0.0508,0.3048,1.016,2.6416,0.1524,0.4572,0.1524,2.1336,0.0508,12.7508,0,0,0.4064,0.4064,3.501813333,3.039872,3.755136,3.039872,3.12928,2.592832,2.950464,3.308096,2.771648,2.861056,1.966976,2.324608,3.039872,1.78816,1.519936,2.503424,2.592832,1.966976,1.519936,2.592832,3.12928,1.519936,1.609344,2.324608,2.592832,2.503424,2.771648,3.218688,4.380992,2.414016,15.24,0.508,5.588,23.876,35.306,21.844,29.718,25.908,24.892,32.766,14.986,70.612,46.228,6.096,4.064,1.778,0.254,1.524,5.08,13.208,0.762,2.286,0.762,10.668,0.254,63.754,0,0,2.032,2.032,0.833333333,0.2,0.6,0.6,0.4,0.4,1,0.4,0.8,0.4,0.4,0.8,0.6,0.4,0.6,0.2,0.2,0.2,0.4,0.4,0.2,0.4,0.4,0.6,0.2,0.4,0,0,0.4,0.2,54.27666667,31.725,64.425,29.3,56.385,74.44,70.27,65.605,53.11,54.13,51.325,61.415,67.195,69.785,72.36,67.36,61.665,65.885,68.445,56.81,47.55,67.615,72.495,61.225,41.415,43.885,46.36,46.14,25.77,25.74777778,15.46944444,15.63,15.75666667,15.86333333,15.95,16.01333333,16.05,16.06333333,16.05,16.01,15.94666667,15.86333333,15.75666667,15.62666667,15.49,15.33,15.15,14.98,14.79,14.58666667,14.38,14.16666667,13.95,13.74666667,13.52666667,13.30666667,13.07666667,12.85666667,12.64,12.42,232.6006945,263.1666667,242.7041667,241.2541667,258.65,280.4583333,222.4166667,237.1666667,224.925,238.725,244.9125,220.0833333,248.0125,268.5333333,247.8083333,306.3520833,275.2291667,237.2041667,233.7958333,254.8833333,252.5625,216.3791667,222.2166667,167.9083333,241.3083333,212.025,192.5208333,177.1916667,131.8916667,157.9166667,812.3333333,867.2,808.8,807.8,831.2,890.4,753.6,797.6,766.4,773,720.8,791.6,890.2,886.6,828.2,904.2,843.4,813.8,832.2,845.6,840.4,766.8,787.2,716.2,823,788.6,707,680.4,596.8,624.2
KSH1_2015,KSH1,2015,39.216975,-96.605733,"49.7% Silt Loam, 50.3% Silty Clay Loam",15.905,61.094,23.001,7.12962963,11.84444444,15.51,8.046,14.6,8.7,14.868,13.178,19.268,19.38,18.878,21.588,20.066,19.49,18.022,19.544,23.432,20.602,23.088,19.76644444,20.66666667,20.66666667,17,14.922,12.71,16.756,23.032,20.566,14.398,15.198,13.05555556,18.74876389,19.71342754,14.92083333,18.95016667,12.62933333,19.63054167,18.28558333,24.100875,25.80116667,22.62670833,27.48670833,25.89404167,26.02895833,23.83304167,24.25383333,28.98883333,25.676125,28.3175,26.19573889,26.66666667,26.77777778,24.66666667,22.5020202,20.903625,22.926,28.77808333,26.1475,20.74408333,22.15320833,18.7962963,26.12044444,24.556,20.146,24.432,16.434,25.078,23.534,29.7,32.546,27.066,33.432,31.71,32.7,29.322,29.254,34.876,30.844,34.09,32.80066667,32.33333333,32.66666666,32.22222222,29.15644444,29.366,29.924,35.232,33.724,28.066,30.046,6.296296297,7.316902777,15.41642935,9.236999999,14.67520833,9.143166667,15.95870834,14.64595834,19.72295834,17.968375,20.13783333,20.57379167,18.04241667,18.32583333,18.95870833,20.165875,23.32308333,21.62583333,23.57629167,20.44348611,20.88888889,21.44444445,17.22222222,15.64601389,14.23758333,18.801625,18.95666667,19.6715,12.829875,15.94191667,65.22333053,48.50429078,77.95351449,72.49375,78.80958334,81.54458333,81.51958333,80.89291667,78.45875,66.69083333,86.89166667,68.90333333,65.1525,66.70958333,76.06083333,79.44,73.49625,79.62875,76.98416666,72.27451563,70.95905421,72.74775097,63.36656485,67.70313746,70.9825,80.02833333,57.45291667,71.31583333,64.84958333,71.52583333,NA,175.0902778,179.5353261,221.1791667,239.2333333,170.4,207.05,233.9875,264.8625,297.4875,211.7333333,297.625,309.55,289.3541667,259.9625,265.5875,319.5291667,262.9666667,280.3333333,291.8486111,NA,NA,NA,342.8169192,300.5208333,209.4666667,257.4666667,226.2666667,242.4208333,212.8541667,3.725333333,0.1016,48.4124,5.2832,17.3736,9.8552,10.7188,0.0508,30.0228,6.9088,5.3848,0,1.4224,3.7592,5.7912,1.016,4.7244,7.8232,1.2192,1.5748,2.9464,5.334,0,0,1.778,1.778,0,9.906,0.0508,0.1524,3.79984,3.486912,5.006848,3.665728,3.933952,3.218688,2.861056,2.771648,4.02336,2.592832,2.414016,4.202176,3.755136,2.324608,3.665728,3.039872,3.039872,2.2352,2.771648,2.324608,2.324608,2.145792,1.966976,3.039872,1.966976,2.771648,5.185664,3.397504,4.380992,4.112768,22.352,0.508,242.062,26.416,86.868,49.276,53.594,0.254,150.114,34.544,26.924,0,7.112,18.796,28.956,5.08,23.622,39.116,6.096,7.874,14.732,26.67,0,0,8.89,8.89,0,49.53,0.254,0.762,0.333333333,0.2,1,0.6,0.6,0.6,0.8,0.2,0.8,0.4,0.6,0,0.2,0.2,0.4,0.2,0.4,0.6,0.6,0.2,0.4,0.4,0,0,0.4,0.2,0,0.4,0.2,0.2,17.77777778,44.49722222,50.165,20.48,47.58,12.835,49.865,41.78,70.335,69.98,64.415,77.58,73.33,72.225,64.415,67.915,83.58,74.7,82.72,73.75111111,75.83333335,76.3888889,67.5,59.00000001,53.635,62.89,82.58,76.415,53.745,58.36,14.63611111,14.84666667,15.02666667,15.2,15.35,15.49333333,15.61333333,15.72,15.81,15.86333333,15.90333333,15.92666667,15.92,15.89,15.83333333,15.75333333,15.65666667,15.54,15.40666667,15.25333333,15.1,14.92333333,14.75,14.55666667,14.36,14.16333333,13.96,13.75333333,13.54,13.33666667,191.5555556,285.0541667,197.9333333,238.2291667,236.0625,170.2791667,248.2916667,243.0125,273.2166667,291.1708333,222.0166667,298.1458333,316.0541667,288.6333333,239.8625,260.9208333,302.9583333,268.7708333,272.0375,283.7541667,236.3541667,278.0666667,281.6541667,259.6791667,277.075,218.7,256.175,218.225,223.2541667,200.4833333,701.6666667,935.2,819.4,843,887,615.4,793.4,767.6,896.4,930.6,775.8,873.8,924.6,909.2,861.2,842,947.6,868.6,912.2,868.4,831.8,921.6,876.2,892,862.8,774,829.6,809.4,812.4,744.8
MNH1_2015,MNH1,2015,44.070847,-93.535534,"96.6% Clay Loam, 3.4% Loam",33.30162,34.21062,32.48776,7.915925926,13.58,10.28,14.934,15.286,15.466,15.602,15.268,12.822,13.456,17,18.17,13.602,18.634,14.61,11.678,16.008,18.9,13.702,8.898,15.246,20.532,12.168,11.836,10.656,15.302,8.7,5.776,7.044,2.622,14.54202546,18.81758333,15.61354167,20.091,20.26133333,20.71408333,21.72854167,21.22408333,19.04704167,19.82254166,23.562125,23.79795833,21.19966667,23.97491667,22.02545833,20.20983333,21.89416667,23.00225,18.14283333,15.33775,20.05725,25.01808333,17.54770833,18.88304167,16.65870833,19.71970833,15.660125,11.56866667,14.839,8.894916667,19.75833333,23.42,20.934,26.076,26.156,25.89,27.378,27.18,24.622,25.602,29.602,29.802,28.2,30.556,29.39,28.068,28.722,28.234,23.578,23.124,26.398,31.376,23.1,27.588,22.746,26.134,23.5,19.656,23.522,16.658,3.42480324,14.47108333,7.561333334,15.064875,13.78020833,14.55745833,15.45945833,15.38370833,13.987625,14.91425,19.05425,20.00583333,15.63358333,21.13991667,16.14304167,15.12654167,18.044,19.66908333,14.8615,10.68891667,17.99075,22.27766666,14.00658333,12.46570833,12.53825,15.382,6.623833333,5.077416667,7.411125001,0.700166667,52.64093126,80.35,62.35458333,75.34833333,71.48833333,70.8625,70.41958333,72.25083333,75.25416667,75.42416667,77.82208333,81.1325,73.78791667,85.30583334,72.77833333,76.6125,81.19875,83.06208333,83.30166667,77.31083333,89.0025,85.94833333,81.83958333,70.15958333,79.48458333,79.58875,59.11208333,68.33541667,65.7625,60.55583333,253.0364583,199.1916667,273.7833333,267.6666667,244.3166667,251.8,284.15,281.3333334,259.3958333,272.7458333,290.2041667,262.4791667,310.8458333,225.1458334,298.6708333,239.4208333,248.4208333,176.9125,185.0291666,232.8833333,181.3666667,171.6208334,173.425,211.2666667,147.7666667,129.5291667,188.7,150.8666667,149.5791667,138.5625,2.624666667,6.4516,1.1176,8.5344,6.9088,3.7592,8.9916,1.2192,1.27,5.1816,0,3.048,0,22.5552,0.1524,6.2992,5.2832,2.4892,11.176,0.1016,2.1336,14.6812,6.096,0.4064,5.2324,0.762,0,0,0.1016,0,2.160693333,2.592832,4.02336,2.861056,2.592832,3.12928,3.486912,1.877568,1.430528,2.771648,3.486912,3.844544,3.218688,3.57632,4.291584,3.12928,2.68224,2.950464,4.202176,4.559808,2.950464,3.486912,2.771648,3.844544,3.486912,1.877568,2.950464,2.861056,3.218688,5.185664,15.748,32.258,5.588,42.672,34.544,18.796,44.958,6.096,6.35,25.908,0,15.24,0,112.776,0.762,31.496,26.416,12.446,55.88,0.508,10.668,73.406,30.48,2.032,26.162,3.81,0,0,0.508,0,0.166666667,0.8,0.2,0.6,0.8,0.6,0.6,0.2,0.2,0.4,0,0.8,0,0.8,0.2,0.4,0.4,0.4,0.6,0.4,0.6,0.8,0.6,0.2,0.8,0.4,0,0,0.2,0,23.02277778,42.5,28.035,51.275,50.91,53.28,57.06,56.12,43.61,47.56,65.28,67.705,54.34,71.36,58.97,49.365,61.685,65.78,43.2,30.055,53.195,75.55,38.17,47.78,33.505,53.59,30.5,13.58,25.665,-1.8,16.06666667,16.24,16.37,16.47666667,16.55,16.6,16.61,16.59333333,16.54666667,16.47,16.37,16.24,16.08333333,15.91666667,15.72666667,15.52666667,15.31333333,15.08333333,14.84333333,14.60666667,14.35666667,14.10666667,13.85333333,13.59666667,13.34,13.08,12.82333333,12.56666667,12.30666667,12.05,255.2013889,194.8,260.3208333,264.2583333,243.6833333,276.5958333,278.2,285.9708333,286.5041667,258.3041667,265.1875,249.7708333,311.2416667,250.3125,316.825,212.6291667,250.5625,187.95,187.0541667,205.775,182.05,201.9083334,192.0875,179.5875,155.25,155.3541667,187.7958333,154.4666667,109.2,154.65,820,624.2,804.2,867.8,734.2,856,896.4,878,889,798.2,841,759.4,905.4,866.8,919.8,719.2,799.4,626.6,665.2,738.2,680.2,737.2,694.2,679.8,624.4,591.8,684.2,629.2,459.2,625.2
MOH1_MOH2_2015,MOH1_MOH2,2015,38.896247,-92.208164,100% Silt Loam,21.88,65.24,12.88,16.97333333,11.312,14.58,10.39,17.29,13.012,19.046,20.11,21,20.268,18.846,18.71,17.756,19.478,23.498,19.888,21.502,18.546,19.99,20.412,18.754,15.456,11.934,18.908,20.868,18.698,11.71,14.246,14.724,13.232,21.22495711,16.33304167,19.10866485,15.15125,21.18023227,16.32166667,23.45308333,25.777625,23.36483333,24.82825,23.54079167,22.973875,22.05016667,25.31916667,28.27679167,24.552375,27.65258333,25.719375,24.99183333,25.52,25.48808333,21.33129167,19.88216667,24.60641667,27.33429167,23.38129166,19.66633333,21.061625,21.71945833,18.46683333,26.08166667,21.144,23.354,20.166,26.036,19.6,28.678,31.568,27.244,29.068,28.956,27.744,26.546,31.488,34.344,30.056,35.178,33.466,31.134,32.178,33.754,28.524,28.178,31.988,35.934,28.868,28.734,28.92,30.622,25.668,14.60266953,9.810291667,15.32323732,10.16191667,16.66273007,13.93645833,18.529625,19.1655,21.31091667,20.831375,18.96870833,18.75008333,18.86341667,20.75708334,22.42829167,20.54295833,22.93329167,19.22808333,20.17266667,20.583625,19.01004167,16.13529167,13.09754167,18.99983333,19.67145833,18.32441667,10.5785,13.414,12.34441667,11.885125,69.68216912,69.19458333,79.62777482,74.41541667,77.49458333,86.32666667,76.03625,69.40291667,88.75125,79.70083333,76.98458333,78.86625,83.91458334,77.51125,72.06125,80.09791667,77.3,71.65125,76.91583333,77.15416667,71.57291667,75.56791667,70.48375,74.00208333,67.11333333,76.2825,60.66041667,66.12958333,59.30333333,69.39333333,196.5743464,247.9375,252.4632092,201.1416667,243.5083333,153.2375,254.8083333,286.7041667,160.7625,212.7208333,256.4166667,247.1208333,191.375,281.8541667,257.1125,218.2708333,281.4916667,296.4416667,235.7125,235.1083333,272.7666667,228.6708333,273.75,199.9416667,223.6416667,170.475,231.4791667,203.1,208.3916666,179.4,3.852333333,5.3848,6.858,6.2992,6.35,3.3528,2.54,3.4544,7.112,0.6604,4.3688,12.9032,12.2936,0.4572,0,18.1864,4.2164,0.3556,3.6068,0.8636,1.778,19.2532,0,0.1016,0,4.4196,0,0.1016,0,0.0508,3.79984,4.738624,4.649216,3.755136,3.933952,3.12928,3.665728,3.844544,3.308096,4.202176,4.380992,3.308096,3.57632,3.665728,4.02336,3.039872,3.12928,2.68224,2.592832,3.308096,1.966976,3.844544,3.039872,3.039872,3.12928,3.308096,4.202176,3.844544,2.950464,3.397504,23.114,26.924,34.29,31.496,31.75,16.764,12.7,17.272,35.56,3.302,21.844,64.516,61.468,2.286,0,90.932,21.082,1.778,18.034,4.318,8.89,96.266,0,0.508,0,22.098,0,0.508,0,0.254,0.5,0.6,0.6,0.4,0.8,0.6,0.6,0.4,1,0.6,0.6,0.4,0.6,0.4,0,0.4,0.4,0.4,0.4,0.2,0.2,0.4,0,0.2,0,0.6,0,0.2,0,0.2,69.165,31.14,44.835,26.39,58.315,31.53,68.45,74.555,70.61,70.81,67.615,66.135,59.475,70.725,83.745,73.61,78.755,71.365,71.975,76.03,71.885,59.475,50.28,70.605,77.17,66.855,48.19,55.445,61.145,47.25,15.02777778,15.21666667,15.35333333,15.49333333,15.61333333,15.71666667,15.8,15.85333333,15.89,15.90333333,15.88333333,15.85,15.79666667,15.71666667,15.61333333,15.49333333,15.36333333,15.20666667,15.05,14.87666667,14.69666667,14.50333333,14.31666667,14.11333333,13.91333333,13.70333333,13.5,13.28666667,13.08333333,12.86666667,195.7534722,255.4416667,255.9625,208.6166667,247.325,162.425,268.3958333,282.775,183.3625,225.2958333,269.325,251.35,207.7875,286.0333333,253.6458333,239.8666667,279.8083333,294.525,211.7583333,260.8375,262.05,251.925,242.7708334,230.45,220.3041667,213.6125,238.175,208.0916667,198.9916667,209.7541667,721.1666667,798.8,886.6,722.6,858.8,581.4,867.8,884,661.6,729.8,929,844.8,669.4,898,772,817.2,894.4,894.6,743.4,869.8,843,880.2,796.4,801.8,739.6,775.6,803.2,737.2,772.6,734.8
NCH1_2015,NCH1,2015,35.29597778,-77.56711667,"52.8% Sandy Loam, 47.2% Loam",54.14949,32.093,13.757,9.621666667,13.41,19.822,15.144,16.39,17.01,19.268,18.456,19.876,23.622,23.424,23.078,20.522,22.534,23.466,22.046,22.58,19,21.398,22.098,19.988,18.368,21.312,19.536,18.278,20.622,22.022,15.924,11.56,NA,15.28082265,20.49733333,23.3963883,21.49541667,22.52666667,23.89025,25.28366667,22.021375,25.89854167,30.20183333,29.147,28.87166667,26.00620833,27.56125,28.59258333,26.652125,27.85995833,24.93504167,27.437625,27.54854167,24.47608333,25.11175,26.34075,25.14032536,23.198375,25.810375,25.57825,21.44454167,17.31068966,NA,20.51666667,27.832,29.144,27.754,29.966,31.28,32.322,27,33.378,37.8,36.59,36.654,32.244,33.388,35.466,32.212,34.878,30.89,34.368,34.554,29.866,32.766,32.402,32.834,29.978,32.978,32.466,27.49,28.11,NA,8.798530984,11.98695833,18.53927394,13.67229167,14.598375,15.97408333,17.92954167,18.665625,20.20441667,21.72204167,22.58995833,22.69070833,20.29325,21.57429167,22.359125,21.59454166,23.24533333,20.75254167,22.255,22.608375,20.726125,19.47645833,22.1845,19.80719592,18.51595833,21.32025,22.538375,15.84870833,13.05275862,NA,71.63293269,63.01791667,76.8675,63.87,65.10333333,64.81625,67.4525,83.10458333,73.135,64.27625,70.35125,72.035,73.14708333,71.89458333,71.255,76.23,78.47083333,80.62875,76.61416667,77.31625,81.9575,74.98958333,79.93375,76.29166667,78.23333334,79.10875,85.15833333,74.8675,80.76206897,NA,211.6840278,286.8083333,214.7041667,307.6375,313.6375,300.0708333,301.0875,212.7833333,286.7708333,345.7666667,332.2083333,284.2166667,295.2416667,286.6291666,282.4833333,269.3708333,301.2166667,265.9416667,318.35,184.5791667,107.8,109.225,63.39166667,54.04583333,32.725,39.16666667,104.8458333,221.2125,260.9310345,NA,2.074333333,0.0508,25.8064,0,0.9652,0,0.1016,3.2004,0.0508,0.0508,0.1016,1.6764,1.7272,0,0.1016,3.048,7.4676,0.0508,0,1.8796,5.4356,0.1524,1.2192,0.2032,0.8128,2.1336,0.9144,2.3876,0,NA,2.831253333,4.112768,4.649216,3.844544,4.112768,3.665728,1.430528,1.78816,2.592832,1.698752,2.592832,2.861056,2.592832,2.771648,2.503424,2.2352,1.698752,0.983488,0.804672,1.78816,2.056384,0.625856,1.162304,0.804672,1.072896,1.162304,1.877568,0.983488,0.44704,NA,12.446,0.254,129.032,0,4.826,0,0.508,16.002,0.254,0.254,0.508,8.382,8.636,0,0.508,15.24,37.338,0.254,0,9.398,27.178,0.762,6.096,1.016,4.064,10.668,4.572,11.938,0,0,0.666666667,0.2,0.6,0,0.2,0,0.2,0.6,0.2,0.2,0.4,0.4,0.6,0,0.4,0.4,0.8,0.2,0,0.2,0.4,0.6,0.2,0.2,0.4,0.6,0.8,0.6,0,0,30.415,53.105,69.89,55.385,62.145,67.385,73.17,63.475,74.69,84.055,83.56,82.695,76.305,81.305,83.665,78.395,81.45,70.39,78.495,80.245,72.415,70.92,78.28,73.84,68.25,76.555,80.025,58.34,9.835,0,14.59722222,14.77,14.90666667,15.04333333,15.15666667,15.27,15.36,15.43,15.48666667,15.52666667,15.53333333,15.53333333,15.50333333,15.45666667,15.39333333,15.30333333,15.20666667,15.09333333,14.96666667,14.82666667,14.68,14.52333333,14.36333333,14.19666667,14.02,13.84333333,13.66666667,13.48666667,13.36666667,NA,227.0347222,260.7458333,222.1458333,289.9041667,306.3125,306.3125,299.0041667,238.8833333,284.6583333,335.4583333,320.8625,270.125,292.3541667,280.7333333,272.8666667,246.6125,291.3916667,268.0958333,309.00625,237.7291667,209.1083333,290.4916667,221.9875,202.6125,209.7416666,216.4958333,186.9125,233.3333333,190.4791667,NA,854.8333333,893.2,835.8,936.8,972.8,967.2,918.6,806,929.8,970.6,943.2,880.2,944.8,904.2,909.4,812,932,906.4,948,848.4,736.2,918.2,765.8,784.6,766,798.8,814.6,839.8,699,NA
NEH1_NEH4_2015,NEH1_NEH4,2015,41.159394,-96.414561,"53% Silty Clay Loam, 47% Silt Loam",15.584,60.872,23.544,16.78833333,16.014,18.194,17.392,16.296,14.886,20.212,20.844,17.254,19.812,17.636,18.63,17.166,17.31,12.694,13.04,17.236,21.214,12.492,16.004,11.752,15.084,9.262,9.712,9.012,3.51,11.74,4.976,1.912,7.144,22.03701389,21.23233333,24.14625,22.77391667,20.98466667,20.49525,25.82616667,25.19225,23.52541667,24.32316667,23.53258333,22.74841667,22.92866667,22.15316667,18.87716667,19.12,21.78508333,25.633,17.81633333,22.494,17.32983333,19.68583333,14.89883333,13.91058333,16.64683333,11.34458333,16.80958333,11.03758333,7.571083333,13.54366667,26.91166667,25.956,29.58,28.206,25.256,26.082,31.056,29.972,29.426,29.2,29.85,27.702,28.266,26.812,25.13,25.108,27.012,31.168,23.398,28.974,23.236,24.888,21.51,19.552,24.936,19.754,22.488,16.706,14.482,20.664,18.1679488,17.20985114,19.28480487,17.92519428,17.80772849,16.24983884,21.80962934,21.6949121,19.23412061,21.37249365,19.77776334,20.4389797,19.69899232,19.20744456,14.42387164,15.7687857,19.11394621,21.75993284,14.4679698,16.91021634,14.01165436,16.49247084,9.3487723,9.830711307,9.475323426,2.500174786,7.861425066,6.184774981,3.150955272,8.688846361,80.56708333,78.16933333,74.65008333,74.51933333,82.23266667,76.68933333,78.7125,81.10966667,76.91225,83.67016667,79.56758333,87.01025,82.09375,83.81941667,75.41008334,81.01658333,85.17008333,79.45958333,80.77275,70.93958333,81.004,82.28466667,69.42516667,76.77091667,63.941,54.57591667,56.83791667,72.43391667,74.228,72.88058333,176.5416667,238.6,234.5083333,250.5666667,200.1916667,222.5416667,271.5416667,240.7416667,266.775,195.6583333,231.1166667,184.5416667,259.5,183.2,245.7666667,201.65,185.375,176.3083334,206.5416667,196.7416666,156.8916667,121.9666667,180.7916667,126.5,162.3916667,153.725,121.575,99.95833333,108.25,119.225,10.16,9.2456,4.6736,0,6.0452,1.7272,0,2.54,0,6.76148,0.0508,5.842,4.22148,11.3792,0.9652,7.62,0,2.2352,2.2352,0,0.3048,16.002,1.5748,0,0,0,0.1524,0.6096,1.27,0,3.278293333,2.950464,4.112768,3.308096,2.592832,3.12928,2.771648,2.68224,2.145792,3.12928,2.2352,1.966976,1.966976,2.771648,4.649216,2.771648,2.861056,3.397504,2.2352,4.649216,3.039872,3.308096,2.771648,1.519936,3.57632,2.950464,4.202176,3.57632,4.02336,5.36448,60.96,46.228,23.368,0,30.226,8.636,0,12.7,0,33.8074,0.254,29.21,21.1074,56.896,4.826,38.1,0,11.176,11.176,0,1.524,80.01,7.874,0,0,0,0.762,3.048,6.35,0,0.666666667,0.4,0.2,0,0.6,0.4,0,0.6,0,0.6,0.2,0.4,0.2,0.4,0.2,0.4,0,0.6,0.6,0,0.2,0.6,0.2,0,0,0,0.2,0.2,0.4,0,66.54,54.925,68.235,63.995,53.88,51.815,72.9,74.5,64.135,71.685,66.55,65.03,63.58,60.285,44.56,45.37,59.9,76.075,39.725,61.745,37.47,49.93,26.71,23.16,33.195,8.16,35.57,4.205,-9.015,19.52,16.05555556,16.09333333,16.10333333,16.08,16.04333333,15.97,15.88666667,15.76666667,15.63333333,15.49666667,15.32333333,15.14666667,14.95666667,14.76,14.55333333,14.35,14.14666667,13.92666667,13.70666667,13.48333333,13.26,13.03333333,12.81,12.59,12.37,12.14666667,11.93666667,11.71666667,11.51666667,11.32,226.0277778,283.6208333,269.0458333,295.9583333,252.9375,255.2083333,295.0666667,280.125,305.8625,241.2958333,265.4125,211.0875,307.2625,208.0958333,284.4916667,205.9916667,242.4666667,191.2958333,245.7291667,187,185.5791667,177.0375,196.525,161.8458333,191.8916667,170.8375,125.0166667,131.7291667,132.8583333,139.925,752.8333333,901.6,863.6,905.6,867,800,874.4,873,932.2,839.8,896.2,793.8,917.2,779.2,891.6,724.6,799.6,720,830.8,722.6,729.6,670.2,722,620.6,700,629.6,572.8,547.4,547.4,563
NEH2_2015,NEH2,2015,41.05136,-100.7463,100% Silt Loam,21.88,65.24,12.88,5.092592593,7.004,9.042,3.086,10.274,4.37,10.932,9.832,16.37,14.158,14.542,15.946,14.38,15.64,15.16,16.714,17.538,16.284,18.066,14.39,16.076,16.124,18.46,10.528,10.166,12.824,17.586,13.856,10.34,9.132,11.48148148,16.56694445,12.92491667,9.008416668,15.926,8.211333333,16.054,16.09975,20.55175,20.5575,20.18883333,22.075,21.02633333,24.39758333,22.20241667,22.0885,25.1005,22.94708333,24.99008333,23.10791667,21.70458333,22.3505,24.12558333,17.44383333,19.55116667,22.49216667,25.55133333,19.765,20.84008333,17.4415,17.77777778,25.20666667,16.988,14.7,21.918,12.36,21.822,23.05,25.86,27.242,26.414,27.106,27.768,32.214,28.312,27.98,33.152,28.724,31.544,29.924,28.134,28.548,30.186,23.64,27.806,30.994,34.06,26.652,30.342,26.264,6.111111112,7.386228966,9.499524503,4.398328074,10.71337075,6.328009418,12.37608128,11.41130454,16.83977674,15.35552644,16.29480595,17.17785393,15.5673435,16.85022266,15.9627656,16.68210172,17.17426589,17.11418764,19.9879207,14.81564988,18.08019245,18.23141086,19.5371478,13.70116704,12.89308728,16.02287472,16.88526611,15.58249193,12.93303312,9.255160104,70.50466231,54.93418585,80.22616667,74.62383333,71.244,88.34283333,79.111,74.275,79.51791667,73.50883333,78.38108333,74.27275,71.1355,62.92925,67.95625,72.04975,61.99766667,69.8735,73.8235,59.69466667,80.80425,77.7135,75.77033333,79.19483333,65.66925,67.70741667,58.94483333,77.93041667,61.25725,59.27016667,NA,291.2638889,141.4416667,184.9666667,259.525,123.4,242.5833333,270.725,227.5083333,234.3,271.6858695,287.7166667,294.55,318.55,275.275,237.1166667,305.8666666,279.4083333,263.3833333,298.175,188.2035714,248.5333333,251.575,188.3666667,263.8916667,236.625,229.0333333,172.6833333,222.175,212.625,1.397,0.1016,3.7084,6.1976,3.15468,7.112,2.3876,2.4892,2.8956,6.81228,8.7376,2.69748,0.9144,1.2192,0,0.9652,2.032,1.4732,1.1684,0,5.1816,4.72948,5.99948,0.2032,0,0,0,0.9652,0,0.0508,4.24688,3.933952,4.02336,7.242048,4.738624,4.02336,3.665728,4.559808,3.218688,2.324608,3.486912,4.380992,3.039872,2.950464,3.933952,2.771648,2.861056,3.308096,3.486912,3.218688,3.218688,2.592832,3.57632,3.844544,3.218688,3.218688,2.68224,3.039872,3.039872,3.12928,8.382,0.508,18.542,30.988,15.7734,35.56,11.938,12.446,14.478,34.0614,43.688,13.4874,4.572,6.096,0,4.826,10.16,7.366,5.842,0,25.908,23.6474,29.9974,1.016,0,0,0,4.826,0,0.254,0.166666667,0.2,0.6,0.6,0.6,0.8,0.6,0.6,0.6,0.4,0.6,0.2,0.2,0.2,0,0.4,0.2,0.4,0.2,0,0.4,0.4,0.4,0.2,0,0,0,0.4,0,0.2,8.611111114,30.52666667,15.075,-5.535,30.48,-8.175,31.885,32.205,55.575,50.64,52.39,57.63,54.83,63.125,55.445,57.84,67.63,62.34,69.725,58.62,57.92,60.515,68.48,35.3,43.31,55.665,68.965,50.665,46.74,37.835,14.75833333,14.98,15.16666667,15.35,15.51666667,15.67,15.8,15.91666667,16.01,16.07666667,16.12,16.14,16.13666667,16.09666667,16.03666667,15.95333333,15.84666667,15.72,15.58,15.41666667,15.24333333,15.06666667,14.87333333,14.67,14.46333333,14.24666667,14.02666667,13.80666667,13.58333333,13.35666667,225.6180556,309.65,178.2458333,211.2583333,285.0916667,154.475,257.1916667,283.4333334,254.4125,264.6791667,300.8,290.3083333,301.6041667,327.6541667,297.3458333,259.0291667,306.1333333,290.7666666,276.4583333,309.2125,214.2916667,267.6458333,221.7416667,231.6875,277.6,251.0416667,238.8416667,185.7,243.7041667,225.2791666,803,947.4,682.6,731.4,930.6,642.8,838.8,941.2,886.4,857.4,944.8,896.8,940.4,961,907.8,851.2,959.4,932.2,901.2,954.6,747.6,866,764,815.4,874.2,804,805,766.6,802,810.8
NEH3_2015,NEH3,2015,41.158431,-101.988324,100% Loam,41.87,40.19,17.93,14.46148148,15.332,16.312,15.954,16.968,14.678,18.99,17.488,17.77,16.054,17.978,17.122,17.222,14.756,10.634,15.5,16.178,17.446,11.314,14.398,11.486,14.578,10.522,9.6,7.966,4.366,9.388,3.946,4.788,5.534,19.38381944,20.66641667,21.85716667,24.06508333,24.51941667,19.275,26.42991667,24.60125,23.92716667,24.10241667,23.8805,22.66,23.42966667,19.37291667,19.38975,23.18241667,25.55983333,23.07575,19.45075,22.42475,18.62408333,19.09533333,13.65775,14.627,16.67141667,12.42983333,14.49741667,10.48431818,9.621166666,9.803833334,25.28648148,26.944,28.29,31.834,32.122,24.524,34.346,32.154,30.534,31.68,31.08,29.31,30.668,25.578,27.724,31.678,34.8,29.912,29.176,31.144,27.734,24.944,17.754,20.688,27.712,22.312,20.834,18.122,14.046,14.366,14.64481482,15.85583333,15.06716667,13.266,15.30316667,13.21641667,14.6825,14.57708333,16.9115,13.51408333,15.27291667,17.98525,17.26525,15.13041667,9.626416666,14.69633333,12.083,13.68883333,10.42066667,8.5745,9.05525,13.64441667,7.869,9.306750001,1.246,-1.258166667,7.357916667,0.246416667,-0.217083333,2.205,76.22547528,75.87333333,68.05583333,56.285,60.87333333,71.59916667,54.9525,58.03583333,67.52083333,57.04333333,63.625,78.37083333,71.36583333,79.43916667,58.625,63.02833333,49.94,62.00916667,63.3675,46.33666667,63.225,74.1,69.96666667,73.07833333,45.03666667,42.65333333,67.20333333,52.64496377,52.40083334,60.05416667,NA,NA,NA,NA,NA,NA,NA,NA,NA,NA,NA,NA,NA,NA,NA,NA,NA,NA,NA,NA,NA,NA,NA,NA,NA,NA,NA,NA,NA,NA,3.767666667,0,0.0508,0,1.8796,0,0,0,0,0,0,0,0,0,0,0,0,0,0,0,0,0,0,0,0,0,0.3556,0,0,0,2.68224,3.57632,3.755136,1.251712,3.218688,3.039872,1.877568,2.68224,2.145792,2.592832,2.2352,1.78816,1.966976,3.665728,2.414016,2.503424,2.414016,2.145792,1.78816,3.218688,2.414016,2.861056,3.933952,1.877568,2.592832,1.966976,2.861056,2.68224,2.414016,2.503424,22.606,0,0.254,0,9.398,0,0,0,0,0,0,0,0,0,0,0,0,0,0,0,0,0,0,0,0,0,1.778,0,0,0,0.5,0,0.2,0,0.4,0,0,0,0,0,0,0,0,0,0,0,0,0,0,0,0,0,0,0,0,0,0.4,0,0,0,59.24388889,55.69,61.225,62.83,66.5,47.92,71.975,68.44,67.98,64.44,66.225,64.165,66.445,48.085,45.7,63,65.445,62.785,49.2,56.41,45.495,47.75,20.69,25.72,36.195,16.695,25.555,5.17,-2.915,-0.25,16.09444444,16.12666667,16.13666667,16.11,16.06333333,15.98333333,15.89,15.77,15.63,15.48333333,15.31666667,15.13,14.94333333,14.74333333,14.53666667,14.32333333,14.10666667,13.89,13.66,13.44,13.21,12.99,12.76,12.54,12.31333333,12.09666667,11.87666667,11.67,11.45666667,11.26333333,239.7708334,328.6666667,316.65,340.9166667,332.0791667,218.5958333,313.0083333,322.075,262.9375,317.3833333,265.5666667,255.1125,300.9333333,203.3083333,281.5208333,257.3833333,244.8916667,241.6416667,242.4291666,231.975,202.7666666,156.3125,63.80416667,149.3666667,194.9625,173.6541667,97.98749999,140.0583333,126.9375,114.5541667,794.6666667,976.6,955.2,989,962.8,758.8,962.6,973,888.4,962.6,829.6,875.4,908.2,684.4,864,829.4,825.6,831.4,822.6,813.6,769.6,666.8,372.6,591.4,704.8,642.2,430.8,612.2,548.8,478.4
NYH1_2015,NYH1,2015,NA,NA,100% Silt Loam,21.88,65.24,12.88,10.37037037,12,15.50022222,17.322,14.622,13.498,13.514,16.766,15.02,14.858,16.568,15.602,17.232,14.112,14.788,16.834,16.888,12.878,14.51,18.21,16.656,11.346,11.778,9.4,11.988,6.434,7.612,8.28,4.344,3.122,15.83333333,17.55555556,20.63504278,21.12345833,20.72166667,17.41641667,18.287375,21.41058333,20.84629167,19.80900089,22.21429167,22.12041667,23.44725,20.07458333,19.833,22.70979167,21.79291667,18.125125,20.53966666,23.88718262,22.63270833,16.50591667,18.36854167,16.53408333,15.57345833,10.5455,13.18404167,12.92808334,8.307625,8.179397163,21.75925926,23.66666667,25.72288889,25.488,25.778,22.022,23.444,26.532,26.68,24.844,27.31,28.722,29.034,25.432,25.3,29.114,27.71,23.722,28.032,31.39,29.756,22.656,25.224,25,20.1,15.446,19.2,18.2,13.092,12.212,11.38888889,13.11111111,15.71264333,16.66983333,15.29675,12.47958333,13.16258333,15.64895833,14.63154167,15.20494326,14.29779167,15.55970833,14.87954167,13.19479167,15.376125,16.28683333,16.82425,12.65529167,15.21554167,17.9552367,15.45079167,11.95933333,11.19220833,10.08358333,11.81491667,5.370374999,8.215750001,5.995,0.218541667,2.80641312,75.5787905,75.59052156,74.72399365,77.14125,72.69,75.50833333,74.81666667,71.75083333,71.7925,76.56583333,63.675,69.9425,61.63666667,67.39333333,77.34458333,70.03125,75.48041667,72.415,74.86,72.73541667,67.84083334,78.71208333,67.29041667,69.90291667,80.39625,72.82375,75.70416667,66.38083333,60.13291667,70.89791666,NA,NA,NA,287.8695652,232.2166667,189.8208333,227.8625,240.6791667,268,223.3416667,280.9,286.475,294.6375,253.5458333,211.0875,260.8833333,193.3416667,161.6,211.5166667,217.5083333,180.5791667,135.5125,178.1583333,182.5666667,92.54583333,113.4833333,127.3291667,106.1291667,89.72499999,78.69166667,6.011333333,5.0292,2.6416,0.1016,1.1684,2.032,0.1016,1.6256,2.4384,4.3688,0.4064,3.81,3.0988,0,4.6228,0,2.3368,0,0,0,1.4732,5.5372,2.9972,0,19.9644,0.2032,4.318,1.016,0.0508,3.7592,2.45872,3.57632,2.592832,1.698752,2.414016,1.698752,2.145792,2.414016,1.698752,2.145792,2.503424,1.609344,2.861056,2.503424,2.056384,2.056384,2.861056,2.2352,1.78816,1.78816,2.414016,2.503424,2.2352,1.251712,3.308096,1.519936,1.966976,3.308096,3.039872,3.12928,36.068,25.146,13.208,0.508,5.842,10.16,0.508,8.128,12.192,21.844,2.032,19.05,15.494,0,23.114,0,11.684,0,0,0,7.366,27.686,14.986,0,99.822,1.016,21.59,5.08,0.254,18.796,0.5,0.6,0.4,0.2,0.6,0.4,0.2,0.6,0.4,0.6,0.4,0.4,0.2,0,0.6,0,0.6,0,0,0,0.4,0.6,0.6,0,0.6,0.2,0.4,0.6,0.2,0.6,36.11111112,39.16666667,52.80777778,57.025,51,38.8,42.395,57.775,54.055,48.725,58.585,60.365,64.11,48.86,50.22,63.23,60.41,41.5,56.355,70.525,60.695,35.005,42.335,36,30.22,4.7,17.03,16.2,-6.41,-11.665,16.1,16.20666667,16.27666667,16.31666667,16.33333333,16.31333333,16.27666667,16.20333333,16.11,15.99333333,15.86333333,15.7,15.53,15.34333333,15.13666667,14.93,14.71666667,14.49,14.26666667,14.03333333,13.79666667,13.56333333,13.32,13.08333333,12.84333333,12.60666667,12.36333333,12.13,11.89666667,11.67,215.7534722,277.7208333,250.2041667,238.05,264.5666667,206.325,256.7166667,271.5708334,272.5208333,234.2333333,285.8416667,286.5791667,280.875,245.4416667,238.8833334,236.1208333,208.8708333,163.8416667,215.6041667,240.2666667,161.9375,202.1666667,190.5583333,201.3,90.61249999,129.975,153.2666667,108.5375,94.0375,109.7125,679.8333333,870.8,803.2,864.2,910.2,742.4,897,875.8,782.6,783.6,934.4,892.2,894.2,816.4,817.8,807.8,788.4,738.8,762.2,784.8,617.4,690.2,700,694.2,367.4,535.8,585.8,544.8,520.2,444.8
NYH2_2015,NYH2,2015,42.7328868,-76.6520083,100% Silt Loam,21.88,65.24,12.88,17.11962963,9.778,9.078,13.368,12.744,10.42,13.4,16.556,14.502,14.256,14.078,13.066,15.134,14.556,17.188,13.22,17.344,14.722,12.076,16.334,18.612,12.534,12.432,16.788,19.386,11.966,13.32,8.29,13.146,6.122,22.54475232,14.81641667,14.59241667,19.78658334,17.78516667,15.69545833,18.79683333,20.890625,19.69470833,20.30454167,17.15783334,19.62033333,20.01520833,20.059625,23.15075,19.85995833,23.9505,21.33541667,19.0355,20.979,24.19820833,18.41291667,18.24495833,22.63116667,25.33208333,16.11116667,20.545625,15.07916667,17.955125,9.650249999,29.09166667,20.312,19.302,26.288,22.844,21.09,23.898,26.568,24.356,25.798,21.756,24.924,25.024,25.568,28.276,26.456,30.434,26.72,25.534,26.202,30.524,25.024,24.61,29.958,32.964,20.688,28.422,22.054,23.2,14.256,13.53776852,8.493083333,7.532208333,8.562958334,12.84066666,11.37495833,14.32333333,17.21991666,15.40379167,13.85983333,14.45195833,13.73491667,15.68479167,14.83795833,17.63608333,13.46554167,17.08920833,13.894,13.72366667,15.84725,18.972375,13.28954167,13.01283333,18.13033333,17.34804167,12.287125,12.94633333,8.769916667,13.05579167,6.103458334,61.69513699,68.73708333,64.8175,51.38333333,77.00666667,77.79,77.75416666,81.31708333,77.38375,68.76291666,85.04375,71.47541667,78.91875,74.92875,72.78708333,70.43916667,68.85791667,65.72958333,74.28083333,74.58583333,74.97875,74.97166667,74.07833333,78.66666667,64.32041667,81.06541667,66.43583333,69.95125,75.37375,79.96125,NA,NA,NA,NA,NA,NA,NA,NA,NA,NA,NA,NA,NA,NA,NA,NA,NA,NA,NA,NA,NA,NA,NA,NA,NA,NA,NA,NA,NA,NA,14.94366667,1.1176,6.7056,0,8.0264,4.4196,12.5984,7.6708,3.556,0.3556,10.0076,0.3048,3.7592,3.2512,0.8128,2.2352,0.6604,0.0508,0,0.0508,0,0,0,0.0508,0.1524,0,0,0,0,0.2032,3.501813333,2.324608,3.039872,3.665728,3.308096,2.324608,3.397504,1.966976,1.78816,2.324608,2.2352,1.966976,1.966976,1.698752,2.592832,2.145792,2.2352,3.218688,1.609344,2.324608,2.68224,2.145792,1.78816,1.698752,2.950464,2.145792,2.414016,1.519936,2.503424,2.324608,89.662,5.588,33.528,0,40.132,22.098,62.992,38.354,17.78,1.778,50.038,1.524,18.796,16.256,4.064,11.176,3.302,0.254,0,0.254,0,0,0,0.254,0.762,0,0,0,0,1.016,0.5,0.6,0.2,0,0.6,0.6,0.8,1,0.2,0.4,1,0.4,0.8,0.4,0.6,0.4,0.4,0.2,0,0.2,0,0,0,0.2,0.2,0,0,0,0,0.2,76.49888889,25.225,20.95,49.14,38.97,28.775,43.245,57.755,47.145,50.135,39.585,44.975,50.2,50.31,62.105,49.19,67.555,53.605,44.025,56.34,70.115,43.895,42.605,66.64,73.465,31.635,54.27,25.86,40.865,0.945,15.42777778,15.61666667,15.78333333,15.93666667,16.06666667,16.17,16.25333333,16.30333333,16.33,16.32666667,16.29333333,16.23666667,16.15,16.04333333,15.91666667,15.76666667,15.6,15.42,15.22,15.01333333,14.80333333,14.58,14.35666667,14.13,13.89,13.65666667,13.42,13.17666667,12.94,12.69666667,249.3402778,244.7041667,266.2916667,269.0458333,201.3041667,295.175,231.3791667,245.0708333,243.8416667,294.0041667,159.6375,303.5666667,258.0875,261.1375,248.1875,284.2291667,303.6416667,257.7583333,231.6375,239.8916667,212.6333333,178.0666667,208.9166667,229.9333333,199.1333333,166.075,208.2833333,203.1125,111.4541667,143.3166666,891.3333333,828,922,887.6,676.8,882.4,742.8,901.4,854.4,930.2,711.8,902.4,791.4,836,845.2,906.4,924,837,811.4,804.2,812.4,768.6,732.6,774.6,723.6,587.2,725.8,705.6,443,526
NYH3_2015,NYH3,2015,42.723533,-76.656415,100% Silt Loam,21.88,65.24,12.88,14.87148148,12.066,10.156,15.468,16.424,14.844,14.656,14.244,15.276,14.522,14.412,18.498,14.912,18.232,15.366,14.278,16.576,18.458,13.552,14.434,18.232,18.966,11.778,13.768,9.48,12.978,5.622,8.78,8.822,3.778222222,20.46042049,16.30479167,16.77775,19.70529167,20.4235,20.36275,19.113875,17.70216667,21.312375,19.50995833,19.62504167,23.35454167,21.07958333,23.915875,20.84804167,19.656,21.53661879,23.320625,18.384625,19.49225,23.11070833,24.075125,16.18120833,19.88479167,15.814625,17.08720833,9.629541667,12.88825,13.85691667,7.107680557,25.86037037,21.446,23.534,24.878,25.166,26.378,23.966,22.344,27.064,24.666,24.646,28.356,27.634,31.202,25.812,25.646,26.844,29.2,24.012,25.524,29.732,30.512,21.422,26.19,23.498,21.834,14.4,17.09,19.722,11.06755556,10.18667196,12.5185,11.39933333,16.02225,16.71825,15.89083333,13.541,14.50975,14.849375,14.98679167,14.71145833,16.75295833,14.63616667,16.11970833,13.72445833,15.045,16.00115603,18.08920833,13.22941667,14.49854167,18.62591667,16.86429167,11.805375,12.833375,9.656166665,13.32754167,4.845208333,9.89325,6.212208333,1.113984848,52.3149142,82.57708333,73.05333333,81.12708333,80.99125,76.76333333,72.27791667,82.68041667,69.35916667,78.22,75.74625,68.46583333,70.20208333,64.48083333,66.28666667,77.03791667,72.79166667,74.68833333,73.81833333,75.18916667,78.13125,66.94083333,78.57791667,67.40666667,70.77375,80.58833333,74.15708333,83.45916667,63.57791667,67.83635982,NA,NA,NA,NA,NA,NA,NA,NA,NA,NA,NA,NA,NA,NA,NA,NA,NA,NA,NA,NA,NA,NA,NA,NA,NA,NA,NA,NA,NA,NA,0.254,6.8072,4.2672,15.0876,4.4704,4.1148,4.9784,5.4356,0.4064,3.3528,3.556,0.8128,3.81,3.048,0,3.8608,0.254,2.3368,0,0,0,1.3716,5.2324,2.6924,0.0508,19.1516,0.254,4.1656,0.8128,0.254,3.725333333,2.861056,2.68224,3.12928,1.609344,1.877568,2.503424,2.2352,2.145792,1.78816,1.78816,2.771648,1.698752,2.592832,2.950464,1.78816,2.2352,2.771648,2.145792,1.877568,1.519936,2.861056,2.414016,2.324608,1.251712,2.950464,1.966976,1.519936,3.039872,3.486912,1.524,34.036,21.336,75.438,22.352,20.574,24.892,27.178,2.032,16.764,17.78,4.064,19.05,15.24,0,19.304,1.27,11.684,0,0,0,6.858,26.162,13.462,0.254,95.758,1.27,20.828,4.064,1.27,0.166666667,0.8,0.4,1,0.8,0.2,0.6,0.8,0.4,0.6,0.6,0.6,0.4,0.2,0,0.4,0.2,0.6,0,0,0,0.2,0.6,0.4,0.2,0.6,0.2,0.4,0.4,0.4,61.91777779,33.725,34.225,50.615,53.975,53.055,46.555,41.47,55.545,47.97,47.45,65.665,56.335,67.86,52.945,49.81,58.08,66.95,43.91,49.895,69.47,68.275,33,49.895,32.445,37.03,0.055,14.675,21.36,-12.88555556,15.95,16.09,16.19,16.26333333,16.31,16.33333333,16.32,16.28666667,16.22,16.13,16.02,15.89,15.73333333,15.56666667,15.38,15.18,14.97,14.76333333,14.53333333,14.31,14.08333333,13.84333333,13.61,13.37,13.13,12.89,12.65333333,12.41333333,12.17666667,11.94333333,267.5,192.1625,321.1583333,211.0833333,250.3916667,259.3375,241.4583333,207.475,294.8708334,254.55,241.3708333,278.1291667,287.5291667,300.5,252.6041667,212.9916667,257.2,199.0416667,160.0541667,225.3208333,238.4166667,198.2,165.4,198.9791667,199.7208333,109.425,125.0041666,144.4208333,120.2833333,106.1791667,888.6666667,616.6,959.4,731.4,894,871.8,794.4,842,891,777,786.6,925.2,899.2,922.2,823.6,781.8,833.4,779.4,735.2,783.6,779.4,722.6,584,704.8,699.8,430.8,484.8,586.6,563.2,558
OHH1_2015,OHH1,2015,39.855359,-83.665356,"46.9% Silty Clay Loam, 53.1% Silt Loam",22.213,44.787,33,11.11111111,16.668,11.322,14.344,20.266,19.79,17.044,15.256,14.478,17.434,17.022,17.512,13.51,18.6,14.246,13.812,14.212,16.444,11.212,10.546,16.566,16.654,11.456,7.846,8.334,14.132,10.866,9.798,7.498,-1.1,17.96296296,22.17523611,16.467625,21.39891667,25.452125,22.01770833,22.86875,18.51016667,19.665,21.36754167,21.43041667,23.43108333,22.156125,24.44983334,21.87770833,20.80383334,21.358875,22.83625,19.383375,17.89283333,22.99641667,23.77791667,18.08033333,17.39783333,17.71875,19.95508333,13.72383333,17.64879167,14.72441667,8.15859375,25.09259259,27.91044444,22.312,27.58,32,25.412,28.146,22.632,25.024,25.722,27.012,31.086,30.78,31.712,29.888,28.066,29.776,30.444,27.122,26.168,31.212,33.58,26.122,28.244,27.834,27.988,17.266,28.544,22.91,16.8325,10.55555556,17.55720833,13.26304167,15.90875,19.90066667,20.58241667,18.90758333,16.86533333,16.03220833,19.38233333,19.02033333,20.54129167,17.17008333,20.92020833,16.27583333,16.75275,17.03691667,19.25041667,13.93479167,13.60904167,19.43229167,18.51829167,13.40920833,10.51741667,10.66720833,12.07545833,10.89354167,11.67508333,8.362875,0.377175481,62.31544155,76.80097569,84.12708333,74.30333333,74.47541667,92.1875,80.65791667,91.2175,81.77291667,89.7825,87.66875,85.40791667,77.32041667,83.10208333,74.71916667,80.86291667,79.72375,82.93875,75.70791667,79.3825,82.89791667,77.11416667,78.69416667,71.51,69.93041667,65.30333333,84.53416667,73.65208333,70.9125,64.95532853,NA,223.5277778,175.875,243.2583333,287.9416667,143.8208333,274.4625,151.1625,241.3583333,185.3666667,163.2333333,198.9666666,248.8041667,268.6208333,314.0458333,246.4291667,273.9791667,237.3083333,306.25,206.2208334,236.8666667,256.0791667,190.5666667,251.775,218.725,182.6625,76.49166667,193.3416667,168.8708333,178.8044872,2.624666667,4.318,0.8128,1.1684,3.5052,20.3708,1.8288,9.0932,0.1016,4.318,8.5852,11.0744,0,2.0828,2.2352,1.3716,0.1524,1.6256,2.794,0,3.9116,1.5748,3.3528,0,0.2032,0,3.8608,0,0.1524,0,3.278293333,3.755136,2.056384,3.218688,3.397504,3.308096,3.039872,3.12928,1.698752,2.68224,3.039872,2.861056,1.609344,1.966976,2.950464,1.519936,1.609344,2.056384,2.324608,1.34112,1.698752,1.609344,2.324608,1.877568,1.609344,2.2352,5.36448,1.698752,3.12928,2.57048,15.748,21.59,4.064,5.842,17.526,101.854,9.144,45.466,0.508,21.59,42.926,55.372,0,10.414,11.176,6.858,0.762,8.128,13.97,0,19.558,7.874,16.764,0,1.016,0,19.304,0,0.762,0,0.5,0.2,0.4,0.4,0.6,0.8,0.2,0.8,0.2,0.8,0.8,0.6,0,0.4,0.2,0.4,0.2,0.2,0.6,0,0.4,0.2,0.4,0,0.2,0,0.6,0,0.2,0,48.33333334,61.28111111,34.085,53.53,75.36,63.005,62.975,44.72,48.755,57.89,60.085,67.415,58.305,71.5,59.67,53.645,59.25,65.36,45.835,41.785,66.415,66.635,42.75,40.225,40.03,55.135,20.33,45.385,26.02,-8.535,15.61666667,15.74333333,15.84,15.91666667,15.96,15.99,15.99666667,15.97333333,15.92666667,15.85333333,15.76,15.65,15.52333333,15.37666667,15.21666667,15.03666667,14.86333333,14.67333333,14.47,14.26666667,14.07,13.85333333,13.64,13.43333333,13.21,12.99,12.77666667,12.57,12.35,12.15416667,259.6666667,259.5875,205.7125,262.5041667,273.6333333,160.6708333,274.4208333,162.9625,250.4958333,184.375,230.1458333,262.6166667,318.725,249.35,296.2145833,217,286.1583333,240.3333333,273.0125,210.0833333,225.1625,219.0416667,211.6125,210.2125,236.9291667,136.8625,101.6458333,167.3666667,183.25,171.0833333,834.6666667,869.8,678.6,837,905.2,696,934.2,623.8,798,641.8,857.4,859.6,953.6,878.6,934.4,730.4,902.6,843.8,856.6,764.8,804.4,741.4,794,759,807.8,584.6,448.6,650.2,675.6,701
ONH1_2015,ONH1,2015,43.498449,-80.4489,,23,46,31,4.444444444,9.444444446,5.777777778,8.666666667,7.567111111,14.11,5.288,10.434,12.41,13,11.656,12.49,8.998,12.364,12.38,13.214,11.08,14.978,13.712,10.834,10.478,17.544,12.634,11.034,14.5,17.022,12,7.144,7.778,8.898,12.40740741,18.44444444,12.22222222,15.22222222,15.18425761,20.97329167,12.40629167,17.15591667,17.28021196,19.07258333,19.26454167,16.74825,16.24554167,18.85783333,20.128875,20.22033333,19.18425,23.65741667,20.746875,17.80829167,17.80829167,22.9548227,19.633875,15.57916667,20.68983333,22.59733333,17.59183333,16.04420834,14.504125,16.09770833,20.55555556,27.22222222,18.66666667,22.11111111,21.44377778,27.48,18.634,23.056,23.256,24.588,25.244,21.7,22.112,25.642,27.468,27.066,25.934,32.422,27.766,24.778,24.532,29.976,26.644,21.088,27.912,30.322,23.632,25.578,23.312,25.078,5.185185185,11.55555555,6.666666667,9.333333332,1.698898297,14.038,7.467875,11.85916667,14.13601812,14.44983333,13.720875,12.15154167,11.35091667,14.15841667,14.96979167,15.68945833,11.64654167,15.87495833,12.872875,11.612625,13.34583333,18.88219415,14.95541667,11.49595833,16.65608333,18.25141667,13.29483333,9.701083333,10.50233333,10.66679167,61.70622736,64.36751025,69.00166225,68.19413004,41.35240787,67.74,75.58666667,74.37,83.39030142,76.54375,73.24958334,77.24583333,77.02791667,76.92958333,76.00958334,77.8775,66.42083333,66.88958333,65.83,70.63458333,78.8275,80.57125,77.26125,78.5875,80.53625,79.08125,78.64166667,71.47958333,81.08083333,74.86083333,NA,NA,NA,NA,296.5678764,270.35,248.6875,260.525,164.8110815,193.0916667,240.6833333,188.5041667,239.0416667,229.2583333,252.9041667,259.4458333,329.1791667,308.6375,290.2,256.8041667,233.5625,218.9583333,226.6,182.8583333,203.4166667,201.4875,162.9083333,213.675,154.7916667,180.7875,0.042333333,0.508,0.3048,0,0,6.4008,4.5212,7.5184,3.81,1.5748,2.5908,5.08,0.1524,2.9464,5.588,2.6416,0,0,4.7752,0.0508,6.1976,3.5052,4.2672,0.3556,0.3048,1.4732,2.9464,0,1.016,0,2.607733333,1.78816,4.202176,3.397504,3.755136,4.112768,2.592832,3.397504,2.503424,2.324608,3.12928,3.486912,1.78816,2.2352,1.34112,3.039872,2.771648,1.78816,4.202176,2.68224,2.2352,1.877568,2.324608,2.950464,1.072896,2.324608,2.2352,1.78816,1.78816,2.145792,0.254,2.54,1.524,0,0,32.004,22.606,37.592,19.05,7.874,12.954,25.4,0.762,14.732,27.94,13.208,0,0,23.876,0.254,30.988,17.526,21.336,1.778,1.524,7.366,14.732,0,5.08,0,0.166666667,0.4,0.4,0,0,0.4,0.2,0.8,0.6,0.6,0.6,0.4,0.2,0.2,0.2,0.6,0,0,0.6,0.2,0.2,0.2,0.6,0.2,0.6,0.4,0.8,0,0.4,0,15,41.66666668,11.11111111,26.94444444,22.52722222,53.975,9.805,33.725,39.165,43.97,42.25,35.475,27.775,45.015,49.285,49.59,42.535,62.445,53.695,39.03,37.525,67.33,48.195,30.305,55.64,66.335,39.08,31.695,27.725,34.94,15.225,15.45,15.64,15.81666667,15.96666667,16.11,16.22333333,16.31333333,16.37,16.40666667,16.41666667,16.39333333,16.34333333,16.25666667,16.15666667,16.03,15.88333333,15.71666667,15.53333333,15.33666667,15.13,14.91333333,14.69,14.45333333,14.22666667,13.98,13.74666667,13.49666667,13.25666667,13.00666667,224.6493056,268.3333333,202.8333333,234.2916667,303.0791667,257.7416667,255.8,257.9791667,209.5166667,283.9375,299.2166667,217.6583333,265.2583333,244.4333333,271.2625,269.0291667,315.4916667,295.85,269.7291666,253.9666667,192.5125,239.7208333,218.2875,159.9208333,207.4125,217.3916666,148.6333333,211.225,193.9875,155.9666667,726.6666667,885,709.6,783.4,894.4,806.8,762.8,841.8,726.8,900.6,922.6,683.4,820.2,787,830.8,792.6,928,899.2,917.2,808.2,700.8,754.2,799.6,636.4,714.4,733.4,574.2,718.8,673.4,606.2
ONH2_2015,ONH2,2015,42.453461,-81.882117,Loam,43,43,14,14.16666666,9.444444445,8.777777778,13.03466667,10.412,9.966,13.464,15.466,13.976,12.71,13.978,10.68,12.01,13.558,17.534,14.244,15.766,13.18,14.024,14.444,19.51,12,12.746,17.71,18.134,7.878,12.756,7.134,14.2,7.656,21.2037037,15.22222222,14.77777778,18.76964722,15.792375,15.99808333,19.36958333,20.40704167,19.09129167,19.93588225,17.76670833,18.82654167,18.840375,19.60783333,23.86654167,22.45595833,23.58354167,20.405875,19.4305,21.07170833,23.73241667,18.67354167,18.631375,23.84045833,24.87391667,15.5175,20.46716667,15.17879167,19.57470833,11.39375,27.77777778,21,20.33333333,25.03533333,20.588,21.51,25.01,25.656,24.202,25.046,22.334,25.722,24.854,25.544,29.136,29.256,30.644,28.132,24.502,27.8,28.668,25.256,25.434,32.378,31.622,24.412,26.654,23.312,24.156,16.134,13.33333333,8.222222223,6.000000001,10.06336111,12.10970833,11.55254167,14.943125,17.29170833,16.22791667,14.81190399,14.57329167,13.385125,15.0715,15.67570833,19.08208333,15.9195,17.1465,15.36879167,15.201875,16.86877482,19.7745,12.886,14.62379167,19.556625,19.32541667,9.688958333,14.33141667,10.40225,15.79304167,5.82075,61.9835804,63.38132098,56.67982462,59.28676392,80.48041666,76.46125,77.05083333,83.59958333,84.81875,74.88742021,83.22875,73.92083333,80.96916667,79.76166666,76.03916667,69.63208333,70.96375,75.87208333,78.74833333,79.05333333,79.52458333,72.31791667,79.49375,79.51875,73.73166667,72.845,72.39,77.3625,79.78375,71.11958333,NA,NA,NA,264.0277778,206.7875,330.25,227.4375,228.575,216.4708333,284.9580674,201.3,321.3083333,225.1125,261.1166667,277.5416667,315.8041667,315.025,285.1333333,219.5166667,249.2083333,232.8375,218.2416667,179.8708333,227.5875,212.7708333,196.4083333,177.2166667,233.9916667,144.8458334,135.5333333,3.598333333,0.6604,0,4.1656,12.2428,0,2.6416,2.9464,2.6416,1.016,10.668,0,3.6576,1.9304,0.4572,5.3848,0.254,8.0772,1.8288,0.7112,1.1684,0.5588,0.0508,0.7112,0.4064,0.8636,6.2992,0,1.1176,1.7272,2.45872,1.877568,2.503424,3.57632,2.324608,1.877568,2.68224,2.145792,1.609344,1.78816,2.145792,0.804672,1.34112,1.698752,1.877568,1.34112,1.072896,1.519936,1.430528,1.698752,1.78816,1.78816,0.983488,1.162304,1.519936,1.251712,1.877568,0.983488,2.414016,2.592832,21.59,3.302,0,20.828,61.214,0,13.208,14.732,13.208,5.08,53.34,0,18.288,9.652,2.286,26.924,1.27,40.386,9.144,3.556,5.842,2.794,0.254,3.556,2.032,4.318,31.496,0,5.588,8.636,0.666666667,0.4,0,0.4,0.4,0,0.8,0.6,0.6,0.4,0.6,0,0.6,0.4,0.2,0.4,0.2,0.4,0.2,0.4,0.6,0.2,0.2,0.4,0.2,0.4,0.4,0,0.2,0.4,63.05555557,26.11111111,22.77777778,45.175,27.5,28.69,46.185,52.805,45.445,44.39,40.78,41.005,42.16,47.755,65.45,57.97,64.415,53.28,46.315,55.305,70.415,43.14,45.45,68.275,68.725,30.725,48.525,26.115,45.89,9.475,15.41944444,15.61666667,15.78333333,15.92,16.04333333,16.14333333,16.22,16.26666667,16.29,16.28666667,16.25333333,16.19,16.10666667,15.99666667,15.86666667,15.71666667,15.55,15.37333333,15.17666667,14.97,14.76333333,14.54666667,14.31,14.09,13.86333333,13.62333333,13.38666667,13.15666667,12.91333333,12.67666667,237.9027778,238.5541667,269.1083333,278.0166667,217.2833333,324.0166667,232.725,232.7,241.0458333,278.275,210.4666667,314.1291667,239.3666666,251.8291667,278.6791667,311.4291666,306.2770833,295.4833333,213.4375,266.1958333,238.4958333,200.9833333,209.8541667,226.2916667,214.3625,196.4708333,174.1666667,219.8083333,139.15,135.6291667,838,827,903.2,901.6,735.2,946.4,810.4,838.8,812.8,859.8,750.8,912.6,768.4,787,880.2,936,930.2,906.4,742.8,866,852,725.4,738.4,773.8,715.2,716.2,610.8,757,560,528.2
SDH1_2015,SDH1,2015,44.208912,-102.929751,"4.1% Silty Clay Loam, 45.8% Clay Loam, 25.9% Clay, 24.1% Silt Loam",22.44298,43.48235,33.97467,9.259259259,6.666666667,13.22222222,13.11111111,12.33333333,13.88888889,14.11111111,15.44444444,15.11111111,13.11111111,14.77777778,14.11111111,15.55555555,11.66666667,15.33333333,13.11111111,17,9.777777778,7.777777778,14.11111111,13.88888889,9.888888889,7.777777778,7.888888888,8.555555555,10.77777778,8.444444444,6.777777778,5.555555555,1.111111111,13.70370371,14.44444444,18.22222222,19.22222222,18,20.22222222,19.44444444,23.22222222,21.22222222,20,23.22222222,20.77777778,24,21.11111111,23.33333333,21.11111111,26.44444444,15.77777778,17.11111111,23.33333333,23.11111111,18.22222222,17.77777778,16.77777778,17.11111111,17.55555556,12.66666667,13.55555556,15.44444445,10.77777778,17.87037037,21.88888889,22.88888889,25.11111111,23.44444445,26.33333333,24.44444445,30.77777778,27.11111111,26.77777778,31.22222222,27.11111111,32.22222222,30.33333333,31,28.77777778,35.66666667,21.55555555,26.33333333,32.33333333,32,26.44444445,27.44444444,25.33333333,25.44444445,24.11111111,16.44444444,20.11111111,25.22222222,20.44444444,9.907407408,9.444444444,13.88888889,13.22222222,13.77777778,15.55555555,14.33333333,15.55555555,15.44444445,13.55555556,13.44444444,13.22222222,15.55555556,10.22222222,13.88888889,13.44444444,14.66666666,9.555555556,7.555555555,13.77777778,12.22222222,7.777777778,7.666666667,6.222222222,7.888888888,11,9.222222224,8.666666667,1.555555556,0.888888889,78.40362441,72.98498169,76.26775758,69.6993343,76.36874155,74.66506073,72.86297722,62.12572911,69.68361683,67.42369719,54.56656624,62.07958262,59.44633291,50.01672495,55.74053253,61.77692491,48.90238595,67.38354039,53.44517297,55.91265817,51.34640414,50.82276804,52.4656485,50.63932167,56.96542122,66.9689198,80.30378023,73.15402418,39.86264506,50.95037604,NA,NA,NA,NA,NA,NA,NA,NA,NA,NA,NA,NA,NA,NA,NA,NA,NA,NA,NA,NA,NA,NA,NA,NA,NA,NA,NA,NA,NA,NA,6.434666667,1.27,10.5156,5.2324,1.8288,7.874,10.2108,3.1496,1.1176,0,12.5476,0,0.3048,3.7592,0.254,0.1016,0,8.8392,0,8.128,0,0,0,0,0,1.27,3.1496,0.254,0,0,4.24688,5.185664,4.112768,3.397504,4.202176,4.02336,3.665728,3.12928,4.202176,4.202176,3.218688,4.202176,3.039872,4.112768,2.861056,3.486912,4.202176,3.755136,4.380992,3.308096,2.861056,4.112768,2.2352,5.453888,3.755136,5.453888,4.291584,3.57632,5.096256,3.844544,38.608,6.35,52.578,26.162,9.144,39.37,51.054,15.748,5.588,0,62.738,0,1.524,18.796,1.27,0.508,0,44.196,0,40.64,0,0,0,0,0,6.35,15.748,1.27,0,0,0.666666667,0.4,0.6,0.4,0.6,0.8,0.6,0.6,0.2,0,0.4,0,0.4,0.2,0.4,0.4,0,0.4,0,0.2,0,0,0,0,0,0.4,0.6,0.2,0,0,21.38888888,21.38888889,40.27777779,43.8888889,39.44444445,50.55555557,46.38888889,62.77777778,54.72222224,48.05555556,61.11111111,53.05555556,63.88888889,51.66666668,62.77777778,54.44444446,67.50000002,28.33333333,34.44444445,59.16666667,57.50000001,40,36.11111112,31.38888889,34.72222222,36.38888889,12.22222222,17.22222223,26.38888889,3.888888888,16.06944444,16.22333333,16.33,16.41333333,16.46333333,16.49333333,16.49333333,16.46333333,16.39666667,16.31,16.19333333,16.05,15.88333333,15.71666667,15.53,15.32333333,15.11,14.88666667,14.65666667,14.41333333,14.17333333,13.93,13.67666667,13.43,13.18,12.93333333,12.67666667,12.42666667,12.17666667,11.93333333,175.5798611,288.0375,228.6708333,259.2625,255.025,328.475,294.7416667,332.7875,291.3125,303.325,292.4375,276.55,317.5333333,332.2895833,295.4333333,256.9875,286.3041666,219.4583333,275.2875,219.7833333,251.3458333,227.5041667,237.4958333,219.6416667,204.0208333,160.9291667,64.83749999,141.2708333,172.7375,149.6166667,596.6666667,902.6,812,851.4,845.6,959.8,905,940.8,906.6,883.6,926.2,883.4,936.6,955.6,890,851.4,866,743.4,853.2,735.8,830.4,769,784.4,757.2,720.2,608.6,314.8,582.8,627.6,569.4
TXH1_2015,TXH1,2015,30.546919,-96.434358,100% Clay,19.61,17.19,63.19,8.62037037,12.566,15.656,11.556,14.89,17.156,18.478,16.624,14.654,19.798,12.864,15.988,22.556,20.002,21.21,19.466,20,19.512,21.642,23.21,23.056,23.276,23.654,22.978,24.458,23.266,23.644,23.71,24.24,NA,11.55543651,17.02391667,18.72095833,18.178125,20.73729167,20.7135,22.14354167,20.852625,20.20279167,24.31254167,19.11720833,22.564,25.04308333,22.72158333,24.336125,23.37304167,24.96545833,25.82483333,27.85541667,27.26891667,25.94208333,28.100625,28.03020833,27.24941667,28.96533333,29.24679167,30.159625,30.34816667,30.54201389,NA,14.1762963,22.588,22.278,24.766,27.022,25.178,26.678,26.634,25.744,29.49,25.742,28.812,28.61,26.056,28.436,28.344,30.132,31.91,34,32.444,29.868,33.302,34.268,33,35.39,35.61,36.754,37.09,37.14666667,NA,8.191785716,14.05279167,17.27408333,12.46666667,14.979,15.96829167,18.35129167,18.29604167,15.83175,21.201125,14.145625,17.12183333,22.59158333,21.64945833,22.42391667,21.53616667,21.35041667,20.36383333,21.40858333,23.34416667,24.16808333,24.18608333,24.018,23.61254167,23.36316667,22.64020833,23.04233333,22.6305,22.57645833,NA,81.04823338,84.34833333,92.11541667,73.70041667,73.54958333,76.2175,80.23916667,86.83625,78.66125,84.35625,77.26041667,74.46625,86.95958333,94.21791667,89.76583333,90.09,82.06875,74.51541667,70.84208333,80.845,90.53791666,81.36,80.805,82.465,74.40375,70.555,68.92333333,67.02041667,66.28263889,NA,62.64285714,156.6666667,109.5333333,252.7333333,228.1125,145.4958333,161.8083333,151.8958333,212.6208333,201.1375,220.4541667,250.1375,134.4,117.7125,158.7041667,160.0708334,272.45,281.6833333,303.5291667,256.8875,158.9625,295.0291667,264.9625,271.7125,286.6583333,310.0875,318.9583333,308.6833334,304.0972222,NA,15.79033333,0,7.8232,0.6604,0.1016,0.1016,0.6604,3.7592,1.8288,4.7752,2.9464,6.5024,10.7696,7.5184,1.1684,7.366,2.286,0,0,0.762,14.3764,0.0508,1.8796,0.7112,0,0,0,0.1016,0,NA,3.278293333,2.324608,2.950464,4.112768,4.828032,5.006848,4.738624,2.950464,3.308096,3.218688,2.950464,4.649216,5.81152,4.380992,3.844544,4.91744,3.57632,1.966976,2.145792,4.02336,4.02336,2.950464,3.039872,3.844544,5.185664,3.308096,3.486912,3.57632,3.427306667,NA,94.742,0,39.116,3.302,0.508,0.508,3.302,18.796,9.144,23.876,14.732,32.512,53.848,37.592,5.842,36.83,11.43,0,0,3.81,71.882,0.254,9.398,3.556,0,0,0,0.508,0,0,0.333333333,0,0.8,0.2,0.2,0.4,0.2,0.4,0.8,0.4,0.4,0.2,0.6,1,0.6,0.6,0.6,0,0,0.4,1,0.2,0.4,0.2,0,0,0,0.2,0,0,8.39,37.885,44.835,40.805,54.78,55.695,62.89,58.145,50.995,72.135,46.515,62,77.805,65.09,73.085,69.44,74.385,73.78,79.105,83.025,80.2,83.19,84.135,82.445,86.145,83.165,84.11,84.275,51.36,0,12.79166667,12.96333333,13.12,13.27666667,13.43,13.58333333,13.74,13.88666667,14.02666667,14.16666667,14.30666667,14.44333333,14.56333333,14.67333333,14.78,14.87333333,14.95,15.02,15.07666667,15.11,15.12666667,15.13,15.11,15.08,15.03333333,14.97,14.89,14.80333333,14.71666667,NA,74.98958334,168.9958333,129.1291667,259.375,224.8083333,158.3375,174.1916667,210.7166667,234.7208333,227.4833333,253.2875,281.3416667,169.25,163.5416667,190.1,200.5833333,286.6166667,312.7958333,331.7625,267.0291667,176.4333334,300.0208333,270.7,277.3041667,293.8166667,335.2916666,328.9875,326.525,319.5902778,NA,393.8333333,695.6,631.4,931,846.8,758.6,725.6,825.4,911.8,891.8,863.8,937.4,751.8,633.6,804.6,817.6,954.2,988.2,995.8,929.4,715.2,953.6,909.8,900.4,897.2,994.8,988.6,981.4,978.6666667,NA
TXH2_2015,TXH2,2015,34.18466667,NA,"Loam, Sand Loam, Clay Loam (50/25/25)",45.46695,34.81025,19.7228,6.574074074,11.77777778,12.44444444,12,12.44444444,12,13.22222222,17,18.33333333,18.55555556,18.66666666,19.88888889,20.11111111,20.11111111,19.11111111,20.11111111,22.88888889,22.44444445,21.55555556,20.55555556,22,21.33333333,20.55555556,16.33333333,17.88888889,17,19.11111111,17.55555556,18.77777778,18.33333333,14.62962963,19.88888889,19.55555556,17.88888889,19.55555556,17.11111111,20.11111111,23.77777778,24.77777778,25.44444444,24.44444444,25.77777778,26.66666667,26.44444444,24.55555556,26.77777778,28.88888889,28.55555555,28.88888889,27.33333333,29.33333333,29.11111111,27.88888889,23.55555555,26.33333333,24.88888889,27,24.22222222,27,24.88888889,22.5,27.77777778,26.22222222,23.55555556,26.66666667,21.77777778,26.77777778,30.11111111,30.77777778,32,30,31.22222222,33,32.66666667,29.66666667,33.22222222,34.44444444,34.44444445,35.77777778,33.88888889,36.44444445,36.44444444,34.77777778,30.55555556,34.66666667,32.55555556,34.66666666,30.77777778,34.88888889,31.22222222,3.055555555,8.888888888,11.88888889,11,10.66666667,11.77777778,13.88888889,15.88888889,16.22222223,16.66666667,18.22222222,17.22222222,15.77777778,16.55555556,18.55555555,18,16.55555556,17.44444445,17,18.22222222,16.33333333,16.33333333,16.11111111,14.66666667,13.77777778,13,14,15.33333333,13.22222222,14.33333333,50.07121018,51.24367431,63.0924421,64.10787208,57.78653055,72.52084057,68.69432725,61.61567627,59.11669485,59.88080846,68.74695052,59.3198372,51.36358085,54.63670698,70.5775062,59.37656171,47.39195795,51.3948089,48.81780266,57.6878518,46.0363163,46.23198343,48.92287897,57.85033379,46.44749259,47.98088249,44.8475378,58.09014611,42.82626505,52.94058509,NA,NA,NA,NA,NA,NA,NA,NA,NA,NA,NA,NA,NA,NA,NA,NA,NA,NA,NA,NA,NA,NA,NA,NA,NA,NA,NA,NA,NA,NA,2.497666667,23.5712,1.1176,11.5316,1.3716,5.1308,18.8468,0,0.4572,9.2964,0.7112,0,0.4572,0,17.4752,2.6416,0,0,0,0.0508,0,0,0,0.0508,1.1684,0,0,0,0,0.1016,4.991946667,4.649216,4.559808,4.559808,5.185664,4.828032,4.291584,4.4704,3.57632,4.202176,2.861056,4.828032,3.57632,3.039872,4.380992,4.02336,3.755136,3.039872,3.755136,2.771648,3.218688,3.308096,3.12928,4.380992,2.861056,2.950464,3.12928,3.218688,5.453888,4.649216,14.986,117.856,5.588,57.658,6.858,25.654,94.234,0,2.286,46.482,3.556,0,2.286,0,87.376,13.208,0,0,0,0.254,0,0,0,0.254,5.842,0,0,0,0,0.508,0.333333333,0.4,0.4,0.6,0.4,0.8,0.6,0,0.2,0.6,0.2,0,0.2,0,0.6,0.4,0,0,0,0.2,0,0,0,0.2,0.2,0,0,0,0,0.2,27.22222222,48.05555557,46.66666667,38.88888889,47.77777778,34.44444445,50,65.2777778,70.27777778,70.55555558,68.33333334,74.72222223,75.27777779,75.27777779,67.22222223,75.27777779,82.22222223,81.11111113,78.88888889,76.3888889,80.00000001,78.33333334,76.3888889,62.50000003,69.72222223,66.94444445,72.77777779,67.50000001,71.94444445,67.77777779,14.41944444,14.58,14.71333333,14.84666667,14.97,15.07333333,15.17,15.24666667,15.31,15.35,15.37666667,15.38,15.37,15.33666667,15.28333333,15.21333333,15.12666667,15.03333333,14.91666667,14.8,14.66,14.52333333,14.37333333,14.22,14.05666667,13.89666667,13.72666667,13.56,13.39333333,13.22,264.3680556,285.6791667,295.7833333,276.3541667,268.1916667,219.2291667,269.2083333,340.0125,314.0083333,309.8875,291.3833333,344.5166667,303.2458333,324.9041667,265.525,318.2333333,345.4041667,309.4708333,330.3,295.96875,322.9541667,307.6416667,245.175,282.0291667,256.4666667,289.3041667,259.9416667,261.1583333,264.9958333,184.4916667,899.5,986.4,1017.2,938,995.6,883.4,867.8,1018.4,979.6,1001.6,939.6,1018.4,934.4,980,922,987.2,1012.8,979.8,988.4,965.8,984.8,948.4,876.8,903.8,863.2,918.6,908.4,867.8,888.4,761.6
WIH1_2015,WIH1,2015,43.05619,-89.332619,"99.8% Silt Loam, 0.2% Loam",21.92093,65.18801,12.89106,13.61111111,15.77777778,14,15.22222222,14.11111111,11.44444444,13.66666667,16.11111111,17.44444445,15.77777778,18.65644444,15.478,14.054,15.378,19.1,12.7,11.266,16.308,19.512,12.2,13.044,10.1,12.3,6.422,7.366,7.346,2.678444444,6.444444444,3.888888889,NA,20.46296296,20.11111111,20.11111111,21.11111111,19.44444444,17.88888889,19.33333333,22.44444445,22.77777778,21.88888889,23.89895833,22.70904167,20.18775,21.44791667,24.15954167,18.08004167,15.48741667,21.45066666,23.983625,16.733375,19.40854167,16.39820833,18.033,12.601375,11.70133333,14.30866667,7.994930556,13.22222222,10.13888889,NA,26.75925926,24.11111111,26,26.66666667,24.33333333,24.33333333,24.77777778,28.33333333,27.66666667,27.77777778,28.97866667,29.544,26.344,28.258,31.502,23.398,20.7,27.056,29.944,22.222,26.554,23.434,25.988,19.156,16.466,21.522,14.25622222,19.66666666,16.25,NA,13.88888889,15.33333333,13.77777778,15.11111111,14.66666667,11.66666667,14.33333333,17.33333333,17.33333333,15.11111111,17.76001389,13.79370833,14.823875,16.77233333,19.8285,13.72854167,11.93583333,18.53558333,20.54783333,12.29058333,12.94704167,11.68691667,13.17875,7.25025,7.932791667,8.488874999,0.495703704,3.888888889,6.250000001,NA,66.5074898,74.71966349,67.51563623,69.04352391,74.22114938,66.9707982,73.07749209,72.87770626,71.60193668,65.47642066,70.18897977,60.87875,74.74958333,77.19583333,79.44041667,78.04375,80.775,85.20708333,82.46041667,78.17916667,68.84291667,77.53208333,76.72291667,73.56791667,79.71458334,70.84041667,60.78844853,54.56102552,77.86680797,NA,NA,NA,NA,NA,NA,NA,NA,NA,NA,NA,186.7916667,307.05,209.3958333,256.8208333,220.025,217.7125,156.7791667,192.4125,204.5291667,199.4,218.5291667,200.1166667,172.35,191.6041667,122.7,136.75,150.9992284,NA,NA,NA,0.381,11.684,0,0,0.0508,0,3.9116,4.4704,9.906,0,0,0,1.3716,0,4.826,0.6096,1.778,1.6764,0.8636,0.6096,2.54,5.1308,0,3.302,0,0,0,0,6.9215,NA,3.203786667,2.950464,2.503424,2.324608,2.2352,1.78816,2.771648,2.950464,2.324608,2.2352,2.771648,3.039872,2.145792,1.966976,2.2352,4.202176,2.771648,2.056384,2.503424,2.950464,4.649216,2.414016,2.324608,4.559808,2.861056,3.844544,3.039872,2.861056,2.90576,NA,2.286,58.42,0,0,0.254,0,19.558,22.352,49.53,0,0,0,6.858,0,24.13,3.048,8.89,8.382,4.318,3.048,12.7,25.654,0,16.51,0,0,0,0,27.686,0,0.333333333,0.6,0,0,0.2,0,0.2,0.2,0.4,0,0,0,0.2,0,0.4,0.6,0.2,0.4,0.2,0.4,0.2,0.4,0,0.2,0,0,0,0,0.4,0,60,49.72222223,50.00000001,54.72222224,46.11111112,39.44444445,46.11111112,60.55555557,60.83333335,58.8888889,68.33722223,61.165,50.855,59.09,71.335,40.245,29.915,57.52,72.14,36.055,48.995,33.835,45.72,13.945,9.58,22.17,-7.663333334,15.27777777,0.277777782,0,16.25277778,16.32,16.35666667,16.37333333,16.35,16.30333333,16.23,16.12666667,16.00666667,15.86,15.7,15.51666667,15.33,15.12,14.91333333,14.68666667,14.46666667,14.23,13.99666667,13.75666667,13.51666667,13.27333333,13.03,12.78666667,12.55333333,12.30666667,12.07,11.83666667,11.63333333,NA,282.5138889,187.5958333,285.1875,253.2333333,219.0708334,292.9166667,256.4041667,250.9875,243.7916667,265.1375,263.2083333,314.1604167,200.6375,273.525,189.6916667,237.175,144.7458333,225.5875,178.575,217.5375,186.9041667,213.525,174.6625,193.4166667,117.0333333,146.4291667,171.05,113.5333333,105.6354167,NA,912,646.8,850.8,825,728.6,909.2,776,822,764.2,805.8,804,917.6,723.8,880,660.4,826,566.6,727.8,649.4,782.6,696.2,758.4,638.4,721.6,486.4,622.6,641.4,487.2,445.5,NA
WIH2_2015,WIH2,2015,43.326583,-89.332619,"99.1% Silt Loam, 0.9% Loam",22.06086,65.01271,12.92643,8.148148148,13.88888889,8,13,15.77777778,14,15.22222222,14.11111111,11.44444444,13.66666667,16.11111111,17.44444445,15.77777778,19.54444444,16.134,14.844,15.466,19.79,13.134,11.878,17.356,19.844,12.178,13.12,10.51,12.712,8.48,8.122,7.778,2.475,14.72222222,19.33333334,15.55555556,20,20.11111111,20.11111111,21.11111111,19.44444444,17.88888889,19.33333333,22.44444445,22.77777778,21.88888889,24.29323337,22.87059574,21.18876596,22.05944681,24.26644866,18.48859575,16.274,21.8819149,24.79514894,17.33285106,19.42153192,16.75697872,18.92297872,13.53093617,12.66965957,14.31638298,9.384468087,20.83333333,24.55555555,22.66666667,26.44444444,24.11111111,26,26.66666667,24.33333333,24.33333333,24.77777778,28.33333333,27.66666667,27.77777778,28.64266667,29.19,27.768,29.764,31.22,24.09,22.21,27.376,30.814,23.364,26.932,24.168,26.3,19.79,17.744,21.134,17.14,6.574074074,14.44444444,7.333333335,13.55555556,15.33333333,13.77777778,15.11111111,14.66666667,11.66666667,14.33333333,17.33333333,17.33333333,15.11111111,17.72290915,14.4553617,14.74829787,16.53506383,20.20786031,13.54910638,11.90987234,18.90106383,20.66680851,12.29046809,13.04693617,11.89970213,13.18306383,7.719319149,8.383702129,8.61293617,3.881170213,59.93092731,74.34123792,58.09002779,67.05727268,74.71966349,67.51563623,69.04352391,74.22114938,66.9707982,73.07749209,72.87770626,71.60193668,65.47642066,67.89812997,62.7119149,70.54765957,74.09787234,80.09864015,75.68085107,77.18382979,84.68638298,78.92851064,75.81574468,69.42255319,77.04085106,72.64468085,70.94893617,77.39021277,71.28978724,71.83829787,NA,NA,NA,NA,NA,NA,NA,NA,NA,NA,NA,NA,NA,179.2985663,268.8736156,204.6441379,271.4655172,227.3121921,259.1825123,187.6442438,188.0572742,222.4646232,236.005698,241.3820513,242.8064388,229.5299601,244.449282,186.6430769,190.2170948,210.5,3.175,1.9304,0,0.4572,11.684,0,0,0.0508,0,3.9116,4.4704,9.906,0,2.1336,0,1.3716,0,7.366,0.0508,2.1844,2.3876,3.2004,2.54,4.318,1.8796,0,4.1148,0,0.0508,0,2.533226667,3.933952,3.665728,3.218688,2.950464,2.503424,2.324608,2.2352,1.78816,2.771648,2.950464,2.324608,2.2352,2.771648,3.039872,2.145792,1.966976,2.2352,4.202176,2.771648,2.056384,2.503424,2.950464,4.649216,2.414016,2.324608,4.559808,2.861056,3.844544,2.90576,19.05,9.652,0,2.286,58.42,0,0,0.254,0,19.558,22.352,49.53,0,10.668,0,6.858,0,36.83,0.254,10.922,11.938,16.002,12.7,21.59,9.398,0,20.574,0,0.254,0,0.333333333,0.2,0,0.4,0.6,0,0,0.2,0,0.2,0.2,0.4,0,0.2,0,0.2,0,0.6,0.2,0.2,0.2,0.2,0.4,0.2,0.4,0,0.2,0,0.2,0,26.94444445,46.11111112,26.66666667,47.5,49.72222223,50.00000001,54.72222224,46.11111112,39.44444445,46.11111112,60.55555557,60.83333335,58.8888889,69.69222223,62.31,55.36,62.465,72.92,43.06,35.22,61.025,73.64,38.855,50.13,36.695,47.53,20.675,14.665,22.28,-0.385,15.9,16.06,16.16666667,16.26333333,16.32,16.35666667,16.37333333,16.35,16.30333333,16.23,16.12666667,16.00666667,15.86,15.7,15.51666667,15.33,15.12,14.91333333,14.68666667,14.46666667,14.23,13.99666667,13.75666667,13.51666667,13.27333333,13.03,12.78666667,12.55333333,12.30666667,12.13333333,243.6666667,213.4708333,335.4833333,281.1375,187.5958333,285.1875,253.2333333,219.0708334,292.9166667,256.4041667,250.9875,243.7916667,265.1375,263.2083333,314.1604167,200.6375,273.525,189.6916667,237.175,144.7458333,225.5875,178.575,217.5375,186.9041667,213.525,174.6625,193.4166667,117.0333333,146.4291667,164.9583334,764.1666667,794.8,947.6,915.8,646.8,850.8,825,728.6,909.2,776,822,764.2,805.8,804,917.6,723.8,880,660.4,826,566.6,727.8,649.4,782.6,696.2,758.4,638.4,721.6,486.4,622.6,634
ARH1_2016,ARH1,2016,34.728333,-90.760278,"99.1% Silt Loam, 0.9% Sandy Loam",22.27015,64.87461,12.85523,8.8,12,14.76,15.1,16,10.54,17,12.8,13.34,17.66,19.66,20.34,18.34,22.34,23.54,25.68,21.28,23.76,23.12,22.32,23.68,24.44,22.66,24,23.24,23.66,23,21.88,22.44,22.5,13.79157266,15.82509968,18.19811262,20.85192101,19.44189674,17.15666667,22.23959962,17.61944615,18.2717274,22.45516835,24.0629697,24.40957633,25.66575758,27.46041667,27.61238095,29.84923838,26.0597869,27.53886447,26.70743496,26.77243275,28.1777,28.01173963,25.29555218,28.74802594,27.43634203,26.72051959,24.64784463,25.77832692,26.80468359,26.60576923,20.48333333,21.32,23.24,26.34,23.9,23.2,27.24,22.54,24.2,28.88,29.44,28.76,31.54,33.12,31.9,33.76,31.9,31.58,31.36,31.78,33.98,32.7,30.12,34,32.24,30.32,27.12,31.12,32.64,31.95,5.429100108,11.56724041,14.09014399,15.8344665,16.12827751,9.519166667,17.55522384,9.3956,12.42517829,17.34274747,19.88761472,19.43209048,16.04015152,22.82874644,21.46700216,23.00230196,20.36617424,23.23325092,22.69155969,22.4904152,23.84596667,23.86243588,23.13700645,24.44761938,22.9108913,23.32096445,22.95124401,22.04420833,22.71626304,21.79823718,61.09795934,77.24751809,78.90384184,74.8199421,83.59167613,64.64135145,76.66692654,62.28097435,73.15366262,76.83852567,79.80610595,76.51439137,58.60479611,77.322987,70.4699513,67.84816314,73.55376732,78.43830049,79.51127454,78.68196813,79.58668548,79.81845217,88.45226117,79.38830952,78.02136061,82.35272684,90.56380602,81.26332724,80.18129335,76.65120192,NA,NA,NA,NA,NA,NA,NA,NA,NA,NA,NA,NA,NA,NA,NA,NA,NA,NA,NA,NA,NA,NA,NA,NA,NA,NA,NA,NA,NA,NA,2.370666667,0.254,10.7696,0.2032,21.1328,0,3.6068,0,1.524,23.114508,1.6256,0.813308,2.54,3.5052,2.54,2.54,8.6868,8.4836,5.2324,4.1148,0.0508,5.4356,0.3556,3.8608,0,2.3368,1.8288,3.81,0.406908,0,4.404077792,3.424878924,2.627193436,3.330897246,3.066787882,2.580980459,4.284288554,2.844532357,2.920980625,4.098795237,1.927051981,1.566652932,1.640442625,2.770982382,3.029763376,2.735147441,2.492717616,3.330846414,3.359048377,3.120439376,1.23535538,2.252459118,2.054582959,1.675734643,1.586935026,3.509434705,1.850110666,2.195910328,1.902824328,3.121290038,14.224,1.27,53.848,1.016,105.664,0,18.034,0,7.62,115.57254,8.128,4.06654,12.7,17.526,12.7,12.7,43.434,42.418,26.162,20.574,0.254,27.178,1.778,19.304,0,11.684,9.144,19.05,2.03454,0,0.333333333,0.2,0.6,0.2,0.6,0,0.6,0,0.2,0.8,0.6,0.6,0,0.4,0,0,0.2,0.4,0.4,0.2,0.2,0.2,0.2,0.2,0,0.2,0.6,0.4,0.4,0,32.55,35.25,45,53.6,49.75,35.2,60.3,38.35,43.85,65.25,72.2,72.75,70.85,80.85,83.85,89.2,78.2,84.4,82.8,80.8,84.2,86.1,80.8,85,83.1,83,75.3,78.3,80.8,32.5,13.89166667,14.08666667,14.25666667,14.42,14.58,14.73,14.87,15,15.11666667,15.22333333,15.31333333,15.38666667,15.44333333,15.47666667,15.48666667,15.48,15.45333333,15.41333333,15.34666667,15.27,15.17,15.06333333,14.93666667,14.80333333,14.65666667,14.50666667,14.34333333,14.18,14.01,13.89166667,248.7881945,168.8666667,213.2833333,256.3708333,213.8916667,311.0625,245.5416667,274.925,282.0333333,237.9916667,273.5333333,284.4458333,347.2125,306,309.0291667,313.1833333,313.5625,267.35,291.1416667,306.2291667,318.875,275.3916667,230.56875,276.025,275.5958333,159.4458334,172.375,248.1291667,260.2166667,270.1145834,851.6666667,715.6,795.4,895,809.6,979.2,908.6,915.8,903.4,906.4,919,925,992.2,967.4,969.2,971.4,980.4,894.8,933.8,959.8,957,890,857,872,919.2,653,684.6,896.4,872.4,898.5
ARH2_2016,ARH2,2016,35.838876,-90.664864,100% Silt Loams,21.88,65.24,12.88,15.83333333,15.22,12.22,17.46,12.4,15.2,19.56,21.02,20.84,20.56,24.1,24.32,24.88,21.64,25.22,22.88,22.78,24.42,24.58,22.8,24.54,22.42,24.04,22.54,21.56,22.42,18.34,22.02,17.46,19.08,21.55677778,17.80548561,19.26219855,22.17968247,15.94926724,20.13678108,22.88805556,25.08352299,24.63452614,26.93428161,29.16061865,28.72653333,28.65062397,25.89698198,28.69715135,26.7861891,27.26807108,29.55828671,28.32438581,26.01541197,28.99397101,27.86633333,26.11160544,24.75160971,25.70872619,27.31211538,24.14880952,27.85071429,24.28538462,24.65406637,27.23333333,21.66,26.22,26.9,20.64,25,28.12,29.78,29.34,32.32,34.42,33.02,32.78,31.58,32.22,31.78,32.56,35.44,33.78,31.24,34.46,33.78,28.9,27.82,31.9,33.44,30.44,33.68,32.22,31.78,13.8752381,14.38896825,9.039305797,16.13581249,8.40932416,10.52857838,19.08461111,19.90606897,18.56088235,16.75284483,22.7655676,21.53896667,23.12044472,19.7252619,23.57959385,22.32630769,22.56733088,24.08961538,24.54935292,23.15020855,24.76481449,22.71483333,23.41736281,22.60979745,22.01503831,23.48411172,19.34178571,22.29178571,18.12551282,19.8313107,64.97254072,80.02776546,55.25804842,70.92913036,63.81143555,58.23198144,80.82169444,75.33494138,71.73217647,56.2641087,70.16311597,66.2484,73.33718769,70.86450714,74.6863373,77.78673846,77.22551653,74.03620338,81.13676441,85.13202337,78.87059058,75.40846667,85.68624989,88.35992539,80.99696456,81.20200549,76.79104037,73.3357381,72.17907302,77.7634228,NA,NA,NA,NA,NA,NA,NA,NA,NA,NA,NA,NA,NA,NA,NA,NA,NA,NA,NA,NA,NA,NA,NA,NA,NA,NA,NA,NA,NA,NA,0.973666667,13.1064,0,2.794,0.3048,0.4572,19.812,1.016,0.7112,4.064508,2.8448,2.54,2.4892,5.1308,3.4544,8.1788,2.8448,3.7084,0,0,0,0,1.422908,9.8044,9.8044,0.6096,0,0,0,13.6144,4.091182479,3.60213913,4.565462762,4.970101753,4.799997964,3.022750457,4.661853982,1.615616239,2.6126406,2.203570397,3.488174529,4.027753557,3.434089154,2.564789142,4.911427569,3.044691953,2.89018638,1.692916486,1.869974146,2.337426401,1.757594198,2.198390693,3.066988455,2.842385205,2.239237269,1.897715721,3.616764991,3.604170167,1.866321966,1.728534569,5.842,65.532,0,13.97,1.524,2.286,99.06,5.08,3.556,20.32254,14.224,12.7,12.446,25.654,17.272,40.894,14.224,18.542,0,0,0,0,7.11454,49.022,49.022,3.048,0,0,0,68.072,0.333333333,0.6,0,0.6,0.4,0.2,1,0.6,0.4,0.2,0.2,0,0.6,0.2,0.4,0.6,0.4,0.2,0,0,0,0,0.8,1,0.6,0.2,0,0,0,0.2,69.2,42.2,45.8,60.05,32.9,50.5,68.9,76.15,75.15,76.1,85.25,85.8,87.2,79.1,88.05,81.1,81.95,86.05,86.45,81.15,86.35,81.05,81.5,75.9,78.35,81.05,69.15,80.05,67.8,72.1,14.48888889,14.66666667,14.82333333,14.97,15.10333333,15.22666667,15.33,15.42333333,15.49,15.54666667,15.57666667,15.59,15.58,15.55,15.50333333,15.43,15.34,15.23666667,15.11666667,14.98333333,14.84666667,14.69,14.53,14.36333333,14.19333333,14.01333333,13.83333333,13.64666667,13.46666667,13.27666667,258.5277778,193.1,318.85,234.8333333,226.8333333,287.5916667,178.7166666,272.6916667,284.4666667,327.4541667,309.3875,316.2875,279.3666667,314.775,253.95,262.2375,295.1083334,303.1208333,259.0375,256.0958333,257.7208333,274.3083333,132.5291667,212.175,229.2375,262.4083333,264.15,235.3583333,225.6458333,218.7625,883.6666667,778.8,996.6,887.6,781.6,889.4,735.6,905.6,895,961.2,944.2,932.2,907.8,944.8,818.4,868.2,948.2,941.2,913.6,870.2,850.8,917.6,568.4,749.6,855.4,876.4,889,860.2,792.4,817.8
DEH1_2016,DEH1,2016,38.648453,-75.45161,Sandy Loam,75,13,12,9.683333333,9.68,9.1,11.66,9.12,13.66,17.44,18.34,16.34,17.02,15,19.08,17.96,17.9,23.16,20.66,22.9,21.88,23.78,21.24,19.46,23.22,23.5,19.22,18.8,19.42,18.44,21.78,16.35,NA,13.33306935,12.53342104,13.24447917,15.53787287,14.35387407,17.49792398,23.55569105,21.15200103,22.21181566,23.1925,20.43361852,24.19393015,22.51957143,22.24129722,27.3880814,25.324,27.44400538,27.01702717,27.35035499,25.36601818,24.88546776,27.88767462,28.19091009,24.06827546,24.28,23.43701248,22.68916667,26.17185897,22.9375,NA,17.4,16.06,17.68,20.78,19.56,21.68,29.32,25.44,27.54,28.46,25.8,29.1,27.56,26.1,32.22,29.66,32.88,32.1,33.54,29.8,30,33,33.44,29.66,29.74,29.12,27,31.66,30.8,NA,9.173212482,11.53104949,8.094116848,11.10418681,6.795383065,12.17239766,17.48564009,18.47467352,14.54345461,11.0625,14.02240056,17.40981995,17.72581006,17.37503333,22.8080814,19.43097222,21.17212366,21.07077064,23.01043252,21.3687117,18.97718088,23.24121574,22.98371084,18.73428608,19.26583333,19.45925101,15.90666667,20.09673077,16.28125,NA,79.1538088,93.93860587,74.85725679,77.9885506,65.00892339,75.66110526,72.75544666,86.08719131,65.559281,49.67866667,71.78561756,69.36795256,77.10367219,76.60637542,78.02148713,72.97482018,71.06626667,72.32885201,79.41725251,79.8460446,72.60850293,77.81847392,75.263736,74.82122059,75.91866667,80.57462281,67.08425,71.60065551,69.80875,NA,NA,NA,NA,NA,NA,NA,NA,NA,NA,NA,NA,NA,NA,NA,NA,NA,NA,NA,NA,NA,NA,NA,NA,NA,NA,NA,NA,NA,NA,NA,2.159,10.821416,4.3688,3.556,0.8636,5.588,7.2644,0,0.7112,0,6.1468,7.2644,1.3208,1.422908,0.1524,1.1684,1.2192,1.524,15.6972,8.2296,2.8448,0.1016,4.6228,4.064,0,1.6256,0.8128,0,0,NA,4.162000865,3.359195988,2.656008418,2.736286464,2.630851011,3.014655664,3.138126839,2.067117441,3.150306606,3.476784033,2.406444121,3.180596141,2.755575859,2.615298186,2.260628141,2.889631303,2.756172703,2.735367918,2.308328368,2.810318377,2.227119629,3.797663361,2.823360504,1.767728516,2.754627033,1.568515443,3.848727045,2.777572625,2.068493583,NA,12.954,54.10708,21.844,17.78,4.318,27.94,36.322,0,3.556,0,30.734,36.322,6.604,7.11454,0.762,5.842,6.096,7.62,78.486,41.148,14.224,0.508,23.114,20.32,0,8.128,4.064,0,0,0,0.333333333,0.8,0.6,0.6,0.2,0.8,0.2,0,0.6,0,0.6,0.6,0.2,0.6,0.4,0.2,0.2,0.2,0.6,0.4,0.2,0.2,0.6,0.2,0,0.2,0.2,0,0,0,25,15.15,19.75,31.65,25.85,38.35,64.7,59.45,59.7,60.9,51.7,69.05,63.8,60,82.6,73.6,82.25,78.85,84.45,75.95,71.7,82.75,83.75,70.55,68.35,68.85,62.75,78.05,25.5,0,14.71111111,14.91333333,15.08333333,15.23666667,15.38666667,15.51333333,15.62666667,15.71666667,15.79,15.84666667,15.86666667,15.87666667,15.84666667,15.81333333,15.74,15.65666667,15.54666667,15.42666667,15.29,15.14333333,14.96666667,14.80333333,14.61666667,14.43,14.23,14.03666667,13.83333333,13.63,13.48333333,NA,160.5868056,119.7875,195.1833333,188.2625,267.5708333,208.0041667,266.1208333,228.4291667,309.8166667,346.0875,251.1166667,239.7083333,310.3,237.5208333,275.3125,291.5875,298.275,299.7208333,245.9625,267.3583333,254.6916667,289.375,269.375,281.7208333,274.2166667,183.3041667,232.2125,211.4041667,208.2916667,NA,590.1666667,523,750.8,699.6,842,757.6,839.2,758.8,952.8,992,801.4,828.4,922.8,822.6,874.6,917.8,916,929.2,854.6,898.2,918.6,895.4,884.2,906.2,872.2,695.6,800.6,774.2,723.5,NA
GAH1_2016,GAH1,2016,31.50743,-83.558661,100% Loamy Sand,81,11,8,13.15,11.42,15.86,19.92,14.18,16.26,17.42,19.4,16.08,20.02,21.82,19.78,23.28,20.8,23.58,22.34,24.14,22.94,22.04,22.36,22.8,23.88,23.04,23.52,22.22,23.56,23.65,NA,NA,NA,16.41087963,18.74438406,21.93666667,24.46692488,19.20492175,23.32916667,22.75,22.67416667,23.34972222,26.20091941,26.33880282,26.37456573,27.85599498,26.8,28.42342392,26.47,28.12666667,28.28333333,27.80446792,27.01804382,28.15583333,29.20388889,26.61775362,26.38472222,26.785,28.17194444,27.69340278,NA,NA,NA,20.38333333,26.3,28.38,30.58,24.64,29.66,28.68,27.24,29.86,32.7,31.46,32.86,33.04,32,33.48,31.9,33.96,34.36,34.3,34.28,34.42,35.2,32.34,31.96,33.5,34.1,34,NA,NA,NA,13.69351852,11.38464976,15.83,19.91278169,11.13564945,15.4925,14.0675,19.59416667,14.555,18.54614632,21.78802034,18.75539906,22.63511613,18.2,20.29173709,22.84416667,23.64583333,22.41611111,21.51248826,22.70420579,22.38527778,22.22222222,23.39309179,23.96138889,23.06416667,23.11527778,22.959375,NA,NA,NA,86.36326389,67.94656039,72.33716667,78.85515571,63.55313772,65.28808333,62.22080556,84.67566667,62.02336111,66.82372222,79.35885642,67.79786111,75.30519686,71.6,63.77691727,82.96925,79.07913889,73.22422222,71.70100391,80.31082316,74.34005556,69.32827778,84.27435749,88.35586111,82.85538889,76.80772222,78.04329861,NA,NA,NA,NA,NA,NA,NA,NA,NA,NA,NA,NA,NA,NA,NA,NA,NA,NA,NA,NA,NA,NA,NA,NA,NA,NA,NA,NA,NA,NA,NA,NA,NA,0,0.406,8.282,5.792,2.084,3.608,1.932,0.05,0,5.232,17.984,0,7.518,0,9.602,7.468,0.914,0.254,6.096,4.622,4.012,5.588,13.21,3.404,1.168,0,3.43,NA,NA,NA,2.654388139,1.434230108,2.0963593,1.886375174,3.323819464,1.493316611,2.452183067,2.046343911,1.406146933,1.502494485,1.419048287,1.501427759,2.510887225,6.839712,2.063777847,1.751967622,2.156377767,2.3793035,1.729043064,1.191312221,1.367563633,2.180670956,1.595273447,2.142087656,1.499032656,1.603350467,1.668370472,NA,NA,NA,0,2.03,41.41,28.96,10.42,18.04,9.66,0.25,0,26.16,89.92,0,37.59,0,48.01,37.34,4.57,1.27,30.48,23.11,20.06,27.94,66.05,17.02,5.84,0,13.72,0,0,0,0,0.2,0.4,1,0.4,0.4,1,0.2,0,0.2,0.4,0,0.2,0,0.4,0.4,0.6,0.2,0.4,0.4,0.4,0.2,0.6,0.6,0.6,0,0.2,0,0,0,40.6,47,60.6,74.05,47.7,63.4,65.25,66.6,63.95,75.05,77.05,74.45,83.2,76,83.95,80.35,85.35,82.35,80.1,80.9,82,84.7,82.6,82.65,80.55,83.9,67.3,0,0,0,13.94722222,14.11,14.26666667,14.4,14.53,14.65333333,14.76666667,14.87,14.96666667,15.04666667,15.10666667,15.15333333,15.18333333,15.2,15.19666667,15.17666667,15.13,15.08,15.00333333,14.92,14.82333333,14.71333333,14.59666667,14.46666667,14.34333333,14.19333333,14.07083333,NA,NA,NA,170.8194444,264.8666667,297.1125,260.2625,316.7125,284.1666667,277.3666667,246.3041667,325.7875,325.3333333,248.9875,330.4458333,272.15,299.9458333,314.6625,267.8541667,306.6041667,310.4375,308.9958333,280.2625,305.2833333,295.61875,250.4125,218.7375,280.3291667,276.475,264.9166667,NA,NA,NA,659,897.8,979.6,882.6,1014.4,917.2,916,899.6,998,994.4,786,996.8,929.8,945.2,978.6,909.6,986.4,977.2,973.2,968.6,967.6,970.4,899,936.2,948.6,928.8,894,NA,NA,NA
GAH2_2016,GAH2,2016,33.71722,-83.31133,"45.4% Sandy Loam, 15.7% Silt Loam, 38.7% Loam",56,25,19,17.33333333,19.98,19.12,20.68,21,20.7,21.88,21.9,22.76,21.78,22.02,21.88,23.42,22.78,22.92,23.34,21.78,22.24,22,21.14,18.44,19.88,19.44,20,18.88,13.02,16.34,10.32,13.34,13.12,23.59444444,25.114303,24.00334613,27.19238996,26.23205556,27.85916667,26.70762515,27.57547339,27.56978632,28.02825275,27.33028458,27.1660203,29.20384615,26.72727467,26.93203419,26.40713812,26.98613248,25.51767877,26.23317949,25.58060606,24.21553333,26.13666667,24.66541667,24.50055556,24.72164363,19.64698198,20.74585165,17.9819,19.1262955,19.65833333,30.2,33.2,30,35.68,32.02,34.76,34,34.44,34.2,35.22,34.58,35.34,35.78,34.56,33.12,32.34,34.44,31.02,32.1,30.8,31.52,33.78,32.64,31.24,32.46,28.24,27.32,27.12,27.26,27.24,16.52013889,20.09547965,17.41741912,19.58950502,18.97186667,17.16083333,20.74764652,21.49360784,22.16431624,20.50920879,21.6598116,21.81742165,21.54032051,22.93262457,23.50500969,23.72826292,22.99377451,22.77815242,22.75340659,21.20515152,18.17563333,19.35545556,19.51875,19.97101389,19.63982719,12.50011261,15.57550366,9.1851,14.06848468,11.58416667,67.426875,76.90136875,71.54215449,68.02828017,66.82819333,55.29336594,74.45762027,73.08286688,74.83961929,67.1800967,74.39596851,75.94169427,66.17050641,82.31732167,83.58478149,86.7235157,81.08012129,86.29621839,83.07729689,78.88898485,72.58611,69.66561538,76.66236322,78.75462186,76.48631029,68.83513616,74.75502381,61.72191,76.41303111,63.56683333,NA,NA,NA,NA,NA,NA,NA,NA,NA,NA,NA,NA,NA,NA,NA,NA,NA,NA,NA,NA,NA,NA,NA,NA,NA,NA,NA,NA,NA,NA,0,1.8288,3.302,3.7592,0.4064,0,10.5156,1.8288,1.1684,0,0.6096,0.4064,0.0508,10.922,25.4508,0.8636,12.954508,5.8928,1.9304,0.9144,0,0,0,4.572508,0.7112,0,0.0508,0,0.1016,0,1.186079222,1.40962132,1.814118538,1.249020687,2.739152034,1.908475404,1.743225849,1.152932537,2.209943567,1.611973528,1.175224006,1.207830549,2.031652726,1.643562299,1.346277108,1.88233808,1.392343533,1.498855391,1.517453434,1.925329233,0.964925463,1.003825344,1.903256407,1.559883519,0.7679914,1.056421919,3.046910542,2.219654379,1.299366253,1.9163039,0,9.144,16.51,18.796,2.032,0,52.578,9.144,5.842,0,3.048,2.032,0.254,54.61,127.254,4.318,64.77254,29.464,9.652,4.572,0,0,0,22.86254,3.556,0,0.254,0,0.508,0,0,0.6,0.2,0.4,0.2,0,0.6,0.2,0.4,0,0.4,0.4,0.2,0.8,0.4,0.4,0.8,0.6,0.4,0.2,0,0,0,0.2,0.4,0,0.2,0,0.2,0,80.35,74.95,70.85,76.7,75.85,76.75,79.7,79.75,81.9,79.45,80.05,79.7,83.55,81.95,82.3,83.35,79.45,80.6,79.15,74.85,70.5,74.7,73.6,74.45,72.2,52.3,59.15,45.85,51.5,50.35,15.19722222,15.28,15.34,15.38666667,15.40333333,15.40666667,15.39333333,15.35,15.29666667,15.22666667,15.14,15.04,14.92,14.8,14.66,14.51666667,14.36333333,14.21,14.04666667,13.88333333,13.71333333,13.54333333,13.36666667,13.19666667,13.02,12.85,12.67666667,12.50333333,12.33666667,12.16666667,295.6875,290.4541667,277.5916667,300.5291667,286.8291667,322.1958333,285.725,310.7333333,258.7208333,310.7708333,264.6458333,274.6416667,286.7541667,234.075,225.4208333,228.4583333,251.6458333,231.8666667,267.6458333,223.5875,266.975,225.4208333,215.7125,237.7416667,222.4333333,227.4083333,181.3583333,231.7166667,172.2541667,201.9333333,953.8333333,977.4,841.8,975.2,950.8,989.6,941,983.4,942.8,970,949.8,953.2,940.6,904.8,898,918.8,903,867.2,899.2,798.4,895.6,861.2,797.6,841,798.2,798.6,719.8,805.4,658.4,748
IAH1_2016,IAH1,2016,41.99750188,-93.69989887,"58.5% Clay Loam, 37.7% Loam, 3.8% Silt Loam",37.767,38.81103,23.42192,9.55,7.12,7.32,11.44,5.88,8.12,16.1,16.78,15.46,16.46,20.08,19.02,19.88,16.56,17.56,19.58,17.68,21.1,21.54,19.44,20.8,18.44,20.76,19.88,16.56,19.76,15.22,20.66,14.34,15.32,14.51240554,9.198243052,15.58846154,15.72671042,11.44,16.60416667,22.53210248,21.35204558,21.36509615,23.16070159,25.10457968,25.09936667,24.106163,21.08416667,21.05661925,23.83960227,22.30532157,24.94372186,26.1355988,23.27171306,24.59606469,23.6875,24.10708996,24.43047619,21.36569169,23.20515263,20.09416667,24.72074689,19.31447179,20.43852069,19.18333333,11.66,21.98,20.02,17.22,23.22,28.32,27,27.54,30.32,31.44,31.22,29.68,25.22,24.64,28.56,27.2,29.22,31.22,27.78,29.24,28.54,28.88,28.98,26.34,28.34,25.32,30.42,25.34,28.22,9.421056833,7.13492596,5.516025641,11.70482614,3.983,5.481666667,15.22484031,16.09627957,12.53357372,14.25722222,18.50127558,15.6711,19.6382306,15.224,17.47130891,19.20477273,17.94484818,22.11907694,21.71597701,19.31242001,21.15092649,18.765,20.62555845,20.32285714,17.13988024,19.98255522,14.43333333,20.91059266,14.05747436,15.71865,73.55878166,87.50792455,54.44497436,79.41356457,63.04676812,52.30882609,66.35448707,74.36668807,60.93488622,60.27121296,68.7443644,58.46722333,77.67455729,71.29415152,80.58628218,77.181764,77.72495266,85.09201605,78.43449907,79.49296403,82.21920829,75.50527536,81.98014311,79.2670854,78.48218739,82.99299691,71.74797101,80.85595221,73.82693179,76.7070483,NA,NA,NA,NA,NA,NA,NA,NA,NA,NA,NA,NA,NA,NA,NA,NA,NA,NA,NA,NA,NA,NA,NA,NA,NA,NA,NA,NA,NA,NA,2.032,5.588,0.2032,8.941308,1.3716,0,2.4384,4.9784,2.3368,1.1684,4.1148,0,19.1516,6.1468,2.2352,1.0668,4.8768,3.708908,4.4704,0,0,0.0508,14.326108,2.7432,3.9116,10.2616,0,6.960108,0.7112,0,4.535358234,3.941658153,3.738412984,3.546160295,4.017944328,1.694496523,3.255441821,2.894137955,3.680545845,3.166972765,3.281843101,2.683682867,3.773930673,2.797173844,2.707753609,3.515011173,3.456014006,3.20976828,2.973537956,2.62146129,2.814675628,2.25561584,2.818706104,2.612717897,3.305739001,2.456296606,2.756748826,3.264139314,3.102570186,2.617084543,12.192,27.94,1.016,44.70654,6.858,0,12.192,24.892,11.684,5.842,20.574,0,95.758,30.734,11.176,5.334,24.384,18.54454,22.352,0,0,0.254,71.63054,13.716,19.558,51.308,0,34.80054,3.556,0,0.166666667,0.6,0.2,0.8,0.2,0,0.8,0.8,0.2,0.4,0.4,0,0.4,0.2,0.2,0.4,0.4,0.6,0.2,0,0,0.2,0.4,0.4,0.2,0.8,0,0.6,0.4,0,29.8,4.45,29.95,29.25,18.05,33.9,61.05,59.45,57.5,61.4,74.9,72.25,71.95,54.45,55.5,69.5,62.2,73.6,78.85,68.05,73.95,66.6,73,70.75,57.25,70.25,51.35,75.5,49.2,58,14.75,14.97666667,15.16333333,15.34666667,15.51666667,15.66666667,15.8,15.92333333,16.01,16.08666667,16.12666667,16.15,16.14333333,16.11333333,16.05,15.96333333,15.86333333,15.74,15.59,15.43333333,15.26333333,15.07666667,14.88333333,14.68,14.47,14.25666667,14.04,13.81666667,13.59,13.36333333,186.2881945,96.27083333,294.8333333,195.5333333,264.0666667,305.55,269.1708333,304.2875,342.95,330.9583333,333.6291666,333.9416667,307.4,307.9916667,196.0083333,292.5,283.4875,226.525,279.9125,241.9479167,259.1291667,241.5916667,224.5458333,253.3208333,221.4916667,218.2916667,230.5791667,215.6083333,206.5208333,224.7041667,654.1666667,501.8,927.2,791.2,891,891.8,826.8,932,982.2,954.6,949.6,973.6,930.2,934.2,717.2,873.2,865.8,762.6,896.6,841.8,863.2,885.8,766,880.4,807.6,799,822.2,789.8,749,764
IAH2_2016,IAH2,2016,42.06591034,-94.7274477,"90.6% Loam, 9.4% Clay Loam",41.03718,39.61253,19.35029,8.25,5.44,11.34,6.44,6.2,11.78,15.2,14.1,14.32,21,17.22,17.98,18.22,14.24,17.8,18.9,16.66,22.88,17.22,17.46,16.68,19.08,16.9,15.02,15.9,15.1,17.68,13.86,14.9,14.88,10.86609784,11.43982456,16.88943501,11.38179048,13.53706897,19.02665213,20.02975136,19.9762782,21.87153846,26.15608631,23.9337456,23.49047138,23.65674545,19.01851447,23.59941314,23.3017615,20.94839767,27.28930912,22.06798052,21.25896266,21.79079196,23.47710307,21.84035696,20.42667496,20.10988602,20.08944872,22.33359756,19.11163333,18.38618548,21.00351494,14.51666667,17.54,22.74,17.64,20.34,25.78,26,26.2,28.78,33.1,31.02,29.78,29.34,23.76,29.9,29.22,26.78,32.22,27.1,27.66,27.02,29.56,29.1,26,25.68,26,27.88,25.78,23.24,29.44,8.280942282,4.288101135,8.993194583,5.437185714,5.429511494,12.15130329,16.07123781,13.82286497,10.8424359,19.94711204,17.99433051,16.09058104,17.66769394,14.67286744,19.13192584,19.79883089,19.26825112,24.70458893,18.91819048,19.98383346,18.62090019,21.62257137,19.47599573,17.64620624,18.52207861,17.17244872,19.51705285,15.91053333,15.93928655,18.04397867,85.43492454,67.09228299,65.79294047,70.30425571,61.68970902,68.97763183,79.91270163,71.29687594,52.97597436,70.9760578,72.16387227,66.12226651,71.69885939,77.64846841,78.08445848,82.6478045,91.07815662,86.91387044,84.45255407,93.25493983,84.00435727,90.43567865,88.14513123,85.86996704,91.52510378,85.18714448,85.57139228,84.0716387,86.69103681,85.40857232,NA,NA,NA,NA,NA,NA,NA,NA,NA,NA,NA,NA,NA,NA,NA,NA,NA,NA,NA,NA,NA,NA,NA,NA,NA,NA,NA,NA,NA,NA,9.906,0.8128,2.794,1.5748,0,1.7272,9.8552,2.1844,0,5.6388,0,0.4064,2.0828,0,4.1656,10.567416,13.4112,0.0508,0,1.3716,2.3876,21.2852,0.762,5.1816,1.778,17.4752,3.3528,9.0932,11.7856,13.6652,5.2823594,3.61354567,4.367646881,5.001159551,2.554962602,3.424473566,3.881853745,3.794881907,5.125313236,4.705307749,3.069407105,3.792502045,3.313936586,2.709625543,3.862862135,4.529882157,2.949004343,3.738963505,2.518630873,1.894926779,2.555769129,3.30590756,1.560641654,4.083564136,2.186821709,2.237067635,4.061412893,3.8302944,3.444614239,3.487563904,59.436,4.064,13.97,7.874,0,8.636,49.276,10.922,0,28.194,0,2.032,10.414,0,20.828,52.83708,67.056,0.254,0,6.858,11.938,106.426,3.81,25.908,8.89,87.376,16.764,45.466,58.928,68.326,0.666666667,0.2,0.4,0.4,0,0.4,0.8,0.4,0,0.6,0,0.2,0.2,0,0.4,0.6,0.6,0.2,0,0.4,0.2,0.6,0.2,0.4,0.6,0.2,0.2,0.4,0.6,0.2,16.1,18.85,35.5,19.95,26.4,47.2,53,50.75,55.25,77.5,67.75,68,66.65,45,67.55,68.9,58.6,82.2,60.8,62.8,57.85,69.95,63.9,52.55,53.65,52.75,62.25,49.65,45.35,59.4,14.93333333,15.15,15.35,15.53333333,15.69,15.84333333,15.96333333,16.07,16.15,16.21666667,16.24333333,16.24666667,16.22,16.17666667,16.09666667,15.99666667,15.87666667,15.73333333,15.58333333,15.41,15.22333333,15.01333333,14.81333333,14.6,14.38333333,14.15666667,13.92333333,13.69666667,13.47,13.23666667,118.3229167,257.3083333,228.9291666,242.7416667,269.7833333,279.2291667,277.4125,276.0083333,326.6958333,285.8083333,323.6166667,329.9125,304.225,260.6791667,309.8416667,296.9958333,230.5083333,281.8333333,283.475,269.7020833,270.975,254.7625,245.2333334,234.8166667,195.9166667,246.9791667,172.05,171.3833333,185.4291667,185.1458333,472.1666667,829.6,786.8,835.2,808.6,896.6,915.8,886.4,959.8,902.4,933.6,956.4,913,823.8,936.2,938,781,899.4,893.8,877,859.8,853,795.2,823.2,724.8,809.8,713,623,707.6,691
IAH3_2016,IAH3,2016,41.987383,-92.2601563,100% Silty Clay Loam,10,57,33,9.216666667,6.02,8.02,9.56,5.1,9.9,16.42,14.8,14.24,17,18.1,17.68,19,14.52,17.12,18.32,16.44,20.9,19.22,18.66,18.44,18.64,18.44,17.24,16.4,18.56,13.32,19.1,13.44,14.14,13.40769994,9.320300857,15.45680912,13.66178766,11.32891026,17.97166667,21.3559495,20.41779429,20.12688312,23.28029017,23.51696237,23.8669883,23.6092045,18.77646667,21.75479115,22.93180307,21.03702905,24.65536566,24.9325641,21.93997866,23.26583489,23.43854255,22.73575115,21.53996309,20.97927938,22.46214286,19.36833333,22.36834408,18.98564103,19.15073397,18.05,12.46,22.1,18.9,17.08,24.88,27.22,26.66,26.44,30.12,30.46,30.32,28.56,22.66,26.1,27.56,26.34,29.32,29.66,26.44,28.46,28.9,27.44,27.22,26.1,27.88,25.56,27.66,24.88,27.22,9.600025946,6.737943413,5.633810541,11.83692057,3.276153846,6.971666667,17.44358732,15.35613844,12.66650433,17.34830089,19.28763441,17.38820539,20.0899009,15.35115455,19.69285596,20.03991293,18.55948419,23.23400505,21.94769231,20.30137506,20.83801631,21.24575035,20.71827112,19.40098679,18.59378361,20.13559524,15.76833333,20.22952429,15.27673077,16.16944007,80.44483196,86.47138212,54.95685613,89.95303011,61.07209922,51.85985507,79.97036157,75.79916297,66.20317532,71.50988059,78.96524891,70.25366852,82.11194856,82.1262797,88.97641253,85.37295315,87.20020855,92.48805505,85.10007051,91.20586826,87.67264686,88.61523426,89.5508714,88.86476671,87.38589132,88.17605,81.50341667,89.03766007,80.95213796,85.34485997,NA,NA,NA,NA,NA,NA,NA,NA,NA,NA,NA,NA,NA,NA,NA,NA,NA,NA,NA,NA,NA,NA,NA,NA,NA,NA,NA,NA,NA,NA,3.005666667,2.896108,1.3208,4.1148,0,0,7.925308,2.794,5.842,3.5052,1.778,23.9776,4.572,3.0988,2.2352,5.7912,4.0132,6.858,0.1524,0.5588,6.5024,20.9296,4.826,1.5748,2.794,2.388616,0,15.0876,0.7112,5.842,5.749673316,4.829591109,4.307083009,5.146472793,4.421709267,3.155442926,3.516685766,3.435415686,5.013392297,3.785801802,3.41283541,3.278822059,3.915463198,2.282000092,2.868146441,3.901917514,3.326463518,3.576157681,2.660351512,3.03308608,2.497215395,2.649546118,2.631945887,2.677393562,3.466203234,2.621398397,3.223849067,4.333774321,3.459421548,3.349690397,18.034,14.48054,6.604,20.574,0,0,39.62654,13.97,29.21,17.526,8.89,119.888,22.86,15.494,11.176,28.956,20.066,34.29,0.762,2.794,32.512,104.648,24.13,7.874,13.97,11.94308,0,75.438,3.556,29.21,0.333333333,0.4,0.4,0.6,0,0,0.8,0.4,0.2,0.4,0.4,0.4,0.2,0.2,0.4,0.4,0.4,0.6,0.2,0.4,0.4,0.2,0.2,0.6,0.2,0.6,0,0.8,0.4,0.2,27.75,6.95,31.65,25.05,17.7,39.75,59.1,53.65,51.7,65.3,69.15,68.6,68.05,42.95,58.05,64.4,56.95,73.35,71.1,62.75,66.4,67.45,64.7,60.3,56.25,66.1,46.9,65.8,46.1,52.85,14.84166667,15.06666667,15.26666667,15.45,15.61666667,15.77666667,15.91,16.02666667,16.11666667,16.18666667,16.22,16.24333333,16.22333333,16.18666667,16.12333333,16.03333333,15.92,15.79,15.63333333,15.46666667,15.28333333,15.09333333,14.89666667,14.68666667,14.46333333,14.24,14.01666667,13.79,13.56333333,13.32666667,169.9965278,137.5208333,303.3208333,162.4625,306.6666667,316.55,241.1666667,316.2625,343.0375,315.3625,328.8916667,331.5791667,329.7666667,287.5333333,234.275,289.8833333,261.1458333,247.8875,270.2916667,194.0145833,268.2083333,208.5291667,255.9458333,255.5416667,187.8375,219.4,239.8375,188.5125,196.2583333,215.55,633.5,614.8,943.2,733.2,954.6,907,809.2,941.4,977.2,917.4,943,955.8,959,907.6,838.2,882.8,820.8,784.8,869.2,723.8,873.8,819.8,873.6,842.6,718.4,790.2,810.2,731.2,696.4,760.2
IAH4_2016,IAH4,2016,41.198693,-91.486205,100% Silty Clay Loam,10,57,33,7.05,5.76,12.02,5.32,6.32,13.32,15.66,13.64,16.1,19.78,18.22,17.98,17.34,14.24,17.9,18.02,17.88,22.44,17,18.46,15.74,19.02,17.34,15.02,16,13.78,18.72,13.38,14,16.88,9.271507195,14.01212121,15.5873138,10.98929048,14.3054023,19.74936047,19.98787636,20.48781666,23.20333333,24.83089251,24.72819865,23.68371212,22.55646768,19.60192443,22.96873333,22.81726889,22.41768149,26.87706553,21.52429004,22.07531981,21.38166696,23.2860614,22.07604802,20.36825663,19.89133124,19.1815641,23.05703089,18.51831905,18.35651515,21.96604242,12.3,21.76,20.4,17.42,21.56,26.46,25.32,27.54,29.44,32.78,30.46,30.44,28.34,24.44,29.12,28.54,28.56,31.56,26.44,28.88,26.46,29.22,29.32,25.46,26.22,24.9,28.76,24.24,24.78,29,7.355503685,4.075900178,10.54163614,3.814804762,5.630344828,14.13463663,16.31061281,12.57675921,12.42083333,19.94515468,17.39341751,17.15678474,16.99519394,15.38148813,18.69044801,19.03479148,20.9759169,23.66715303,19.01914286,20.95154774,18.06515019,21.0371547,20.21882094,17.60406286,18.42697371,15.88353846,20.38875285,15.42371429,15.39613636,19.50331933,88.47133454,57.53225428,75.89242532,64.14200571,60.77220144,73.39797274,81.24645163,64.80918363,53.22733333,76.85243764,66.35152946,69.24556281,73.36708162,78.40276343,78.90556981,81.25979662,92.41609593,84.41904957,86.97888636,94.0374184,83.30349477,88.69874115,90.36813733,85.91312003,92.26896392,83.25412525,86.63156228,84.14614727,84.53980824,87.55851518,NA,NA,NA,NA,NA,NA,NA,NA,NA,NA,NA,NA,NA,NA,NA,NA,NA,NA,NA,NA,NA,NA,NA,NA,NA,NA,NA,NA,NA,NA,9.821333333,0,3.048,1.3208,0,4.2164,8.9916,0.5588,0,5.6388,0,0.4064,2.0828,0,9.5504,5.182616,13.4112,0.0508,0,3.7592,0,21.2852,5.4356,0.9144,18.8468,0,9.5504,3.7592,10.922,13.6652,4.979318314,3.790297642,3.88706265,5.172297922,2.130156572,4.220946747,3.428507327,4.303285876,5.204458467,3.825967424,3.45526226,3.921589382,2.966686886,2.717016979,4.243018511,4.181656787,3.121289865,3.512071334,2.154206412,2.470065034,2.129911499,3.253391402,2.106523899,4.057626236,1.877385484,2.378096248,3.926837325,4.258103048,3.146236719,3.643366944,58.928,0,15.24,6.604,0,21.082,44.958,2.794,0,28.194,0,2.032,10.414,0,47.752,25.91308,67.056,0.254,0,18.796,0,106.426,27.178,4.572,94.234,0,47.752,18.796,54.61,68.326,0.666666667,0,0.6,0.2,0,0.6,0.8,0.2,0,0.6,0,0.2,0.2,0,0.6,0.4,0.6,0.2,0,0.6,0,0.6,0.4,0.4,0.6,0,0.4,0.4,0.4,0.2,7.5,28.85,31.05,18.55,29.45,51.1,52.45,52.4,59.7,74.45,70.25,68,63.6,45.85,66.7,65,64.45,81.1,58.6,66.95,55.5,68.95,65.55,51.2,55.25,46.7,67.05,44.6,46.95,63.3,14.96944444,15.18666667,15.38,15.56666667,15.72,15.86333333,15.98333333,16.08666667,16.16666667,16.22,16.24333333,16.24,16.21,16.15666667,16.07666667,15.97,15.84666667,15.70333333,15.55,15.37,15.17666667,14.97,14.77,14.55333333,14.34,14.10333333,13.87666667,13.64666667,13.42,13.19,106.7256945,293.9333333,173.15,262.7125,295.9333333,262.0708333,242.4833333,332.1291667,333.9875,305.9458333,343.7291667,319.6125,303.8375,248.0708333,296.0916667,293.2375,236.5666667,283.525,223.6166667,243.1458333,226.4083333,247.125,231.0541667,220.9375,160.6166667,245.5958333,174.95,219.6375,199.025,181.575,512.1666667,950.4,734.8,865.8,895,857.8,862.2,968.2,953.2,912.4,958.8,934.6,935,761.4,938.2,913.6,811.6,881,778.2,830.8,805.8,817.6,825.6,755.2,671.8,830.6,661.8,780.2,713.6,724.8
ILH1_2016,ILH1,2016,40.061188,-88.234042,"64.2% Silt Loam, 35.8% Silty Clay Loam",17,55,28,9.716666667,6.44,12.68,7,9.58,13.66,17.98,16.68,15,20.46,19.1,18.52,15.88,16,17.78,19.56,19.44,21.58,19.44,19.54,19.28,20.44,20.58,15.9,20.36,16.9,19,14,17.76,15.78,14.605111,12.53105931,16.70439042,12.66291126,14.86667179,21.8508871,23.18023514,21.5228,22.25196667,26.07264,24.9650974,24.51301282,22.15080328,19.74045074,22.57805633,24.16265873,23.36359698,25.7851546,23.28007407,24.3221,23.7087963,24.51552521,23.01875844,21.13643275,24.72721019,20.93571429,24.37855766,19.9268379,21.54121889,23.575,19.08333333,18.54,22.78,18,20.56,29.34,29.54,26.78,28.9,32.68,30.88,30.32,28.48,23.22,28.32,29.68,29.34,30.66,28.2,29.32,28.54,28.56,27.46,26.12,29.9,26.54,29.78,26.1,27.08,32.24,12.00781282,6.240948588,12.69074618,6.005627706,6.537117949,11.32586022,16.31844212,14.72847949,11.41756667,18.26977202,17.51856061,19.21173077,16.34904251,16.62531412,18.93415967,20.46083333,20.23260365,22.83776772,20.10235926,20.6771,18.61435185,21.86211485,21.23846379,17.70027778,21.49144783,16.45663004,20.58659343,15.99275793,17.8818172,15.78,85.65494495,69.29604753,79.13467596,67.01767208,61.9323789,56.08799194,68.68876849,69.50940282,54.01366667,65.26881538,65.37682684,74.24400128,71.78443395,83.29638492,81.26867091,80.9005911,83.58255592,84.39710482,83.28328815,81.18102,74.47277778,86.06655649,90.17069932,81.86040058,83.2360071,77.19639377,80.80582223,80.65964165,82.06796398,66.04847101,NA,NA,NA,NA,NA,NA,NA,NA,NA,NA,NA,NA,NA,NA,NA,NA,NA,NA,NA,NA,NA,NA,NA,NA,NA,NA,NA,NA,NA,NA,6.604,0.8636,5.08,1.9304,1.1684,1.016,2.794,5.9944,0,10.5156,1.676908,7.366,0.8128,2.8448,2.3876,1.8796,4.7244,9.804908,2.794,0,0,5.08,10.1092,3.3528,1.7272,0,7.5692,16.256,2.4384,0,4.878771498,4.763961295,4.503744803,5.91264276,3.351866137,4.984676558,5.391878623,3.336117754,4.690014467,3.720019673,4.52697729,3.789209832,2.86134448,2.969483602,3.443009889,4.231644925,2.962674852,3.351500175,2.091100539,1.922648709,2.649862937,2.713227371,3.323411344,3.624808014,2.669722919,3.547355197,3.90555371,2.828919908,2.919614417,2.27305963,39.624,4.318,25.4,9.652,5.842,5.08,13.97,29.972,0,52.578,8.38454,36.83,4.064,14.224,11.938,9.398,23.622,49.02454,13.97,0,0,25.4,50.546,16.764,8.636,0,37.846,81.28,12.192,0,0.666666667,0.2,1,0.6,0.4,0.2,0.6,0.4,0,0.4,0.2,0.2,0.2,0.4,0.4,0.2,0.4,0.6,0.2,0,0,0.4,0.6,0.4,0.6,0,0.2,0.4,0.6,0,28.1,21.35,38.65,21.1,28.1,56.9,67.75,58.65,56.95,76.15,71.9,69.6,58.1,48.05,65.25,72.25,71.1,78.1,69.1,71.6,69.55,70.85,70.1,55.05,74.5,58.6,69.45,50.25,62.1,64.45,14.83611111,15.04333333,15.21666667,15.38333333,15.54333333,15.66666667,15.79,15.87666667,15.95333333,16.00333333,16.02333333,16.02333333,15.99666667,15.94333333,15.87,15.77333333,15.65666667,15.52333333,15.36666667,15.21,15.03666667,14.85,14.65333333,14.45666667,14.25333333,14.04333333,13.82333333,13.61666667,13.4,13.17666667,145.8576389,237.0625,181.425,267.0541667,247.8958333,306.4583333,268.8416667,258.6958333,344.4041667,317.2625,335.3666667,312.1208334,304.6791667,208.2291667,289.3,287.2375,264.825,276.2416667,259.6916667,268.2,283.7375,170.3,237.525,257.0708333,221.0375,249.3875,173.8833333,228.1125,203.1583333,209.1208333,615.1666667,859.2,751.4,852.6,844.4,966.2,890.2,863,981.2,929,970.4,950.8,917.2,647.8,931.8,946.8,895,892.4,921.2,841,872.4,646,837.4,872.2,810.2,814.6,671.2,801,742,763.4
INH1_2016,INH1,2016,40.47925,-88.990125,"61% Silty Clay Loam, 39% Silt Loam",20,50,30,8.6,18.12,15.46,13.9,16.8,17.32,18.66,18.44,12,18.44,16.98,17.88,21.12,19.44,18.44,18.78,20.42,21.02,16.64,19.14,18.92,15.56,17.32,15.12,14.38,15.22,12.12,13.12,7.36,11.1,17.06286111,22.86653846,21.64159829,19.12158696,24.36757246,23.0604145,23.9265696,23.11519919,17.83722043,21.82044346,22.08141967,22.00252706,25.05490306,24.15821685,22.67130679,24.39872631,26.06643519,23.22804175,20.83191014,23.02287999,22.72260783,21.62166667,21.60641805,20.29965054,19.35296604,20.97448448,15.18091667,17.65861644,14.63716667,16.22307692,24.16666667,28.08,28.32,24.12,31.44,29.44,29.9,29.02,21.86,27.44,28.56,27.22,30.56,30.22,28.42,30.1,31.88,26.78,26.76,28.54,28.78,27.9,26.34,26.44,28.32,27.56,19.12,23.88,22.66,23.3,6.701916667,16.36450321,13.97129829,11.86058546,14.08007246,16.60847491,19.17317216,18.88497419,13.4717957,20.03317112,18.90561329,19.05357706,22.82946189,20.73225209,20.05904857,19.30181159,20.85212963,21.69844286,18.43839503,20.70911991,19.86770554,16.63666667,19.4573247,16.54293011,16.42220678,16.57879703,11.41192568,14.45129665,9.017,12.96666667,56.06014034,69.06003686,67.0772296,68.36634648,55.09115942,70.44401914,77.7323958,78.93892656,78.14051667,90.71091791,83.9212501,84.8057734,88.61313663,82.82771476,86.83281037,76.07259643,74.76802546,91.70238192,87.76746121,88.16978733,85.47009825,75.38558333,89.19774021,80.95901344,86.26113514,79.19021363,81.28801892,83.69144562,72.07393333,82.94897436,NA,NA,NA,NA,NA,NA,NA,NA,NA,NA,NA,NA,NA,NA,NA,NA,NA,NA,NA,NA,NA,NA,NA,NA,NA,NA,NA,NA,NA,NA,0.550333333,0.9652,0.4064,8.0264,0,1.27,14.5796,4.7752,2.5908,2.6416,3.0988,11.9888,0.3556,1.5748,0.6096,0,0.0508,10.9728,2.5908,4.978908,7.8232,0,11.9888,0.1016,2.1336,0.5588,0,0,0,0,2.395835157,3.392182578,1.654193078,3.290899517,2.539228483,3.369950049,3.111120658,2.634785399,2.190191363,1.801872053,2.29453044,2.618693368,1.368575068,1.80332254,1.200981151,1.74096567,2.598194378,2.872443694,2.323153562,1.962950906,2.24662765,2.8680253,2.03172203,2.280473392,0.834200766,2.407733154,2.982732408,1.859757527,2.172668493,4.26065159,3.302,4.826,2.032,40.132,0,6.35,72.898,23.876,12.954,13.208,15.494,59.944,1.778,7.874,3.048,0,0.254,54.864,12.954,24.89454,39.116,0,59.944,0.508,10.668,2.794,0,0,0,0,0.333333333,0.2,0.2,0.2,0,0.4,0.6,0.2,0.4,0.2,0.4,0.4,0.2,0.4,0.2,0,0.2,0.6,0.2,0.8,0.4,0,0.6,0.2,0.2,0.4,0,0,0,0,43.6,65.5,58.9,45.6,66.15,66.05,69.45,66.4,35.2,64.7,63.3,62.75,77.5,72.45,67.15,70.25,76.05,69.5,58.5,69.2,68.4,57.25,58.05,53.9,56.75,56.65,29.2,43.05,31.95,7.2,15.63333333,15.77666667,15.88,15.96333333,16.02,16.05,16.06333333,16.04666667,16.00666667,15.93666667,15.84666667,15.73666667,15.60666667,15.46666667,15.30333333,15.13666667,14.95,14.75666667,14.55333333,14.34666667,14.14,13.93,13.71,13.49,13.26666667,13.04333333,12.82333333,12.6,12.38333333,12.25,310.7569445,261.1291667,274.8125,273.8583333,315.2,304.9625,289.2333333,313.9416667,246.6541667,239.3625,286.3958333,278.75,269.9041667,278.5125,252.4229167,290.0208333,237.7,165.8791667,251.6375,196.3416666,240.0791667,254.675,174.3291667,179.7833333,221.9833333,205.7458333,106.6791667,158.9375,175.5708333,191.2083333,952.8333333,916.6,887.8,839.6,920.4,961.4,891.2,949.8,753,829.8,937,896,896,904.2,867.8,918.6,844.6,669.6,872.6,827.6,811.4,838.2,631.4,762,783.6,735.2,504.8,634.8,668.8,711
KSH1_2016,KSH1,2016,39.144306,-96.629461,"90.1% Silt Loam, 9.9% Loamy Sand",27.81996,60.02501,12.15503,12.31666667,10.66,10,7.1,12.44,9.12,8.66,15.62,15.12,14.58,15.9,22.46,22.1,23,21.12,19.34,22.44,22.14,22.2,25.66,20,22.66,21.46,21.56,18.66,16.48,18.94,17.66,21.66,16.22,16.18046892,17.24651771,13.42458602,13.4396697,20.23923118,15.56018084,12.83472448,20.67147773,20.30511879,21.72119048,24.46033333,28.41463109,29.27770952,29.55011026,26.53841454,23.20730519,28.31357744,26.67559059,27.74839744,31.21277778,24.75845538,26.94281441,24.23085551,27.39990741,25.30572742,22.40651961,23.16554094,22.62667737,26.13206667,22.35558608,20.91666667,24.88,17.58,20.68,27.78,22,18.1,26.22,28.24,28.22,31.78,34.32,36.54,36.46,33.12,28.12,34.2,31.88,33.58,36.88,31,32.22,28.02,33.44,32.34,29.22,28.64,27.92,31.56,28.78,11.57338018,10.59380259,8.429205558,5.083935065,12.24233333,5.68934262,8.770957248,15.32561828,15.58981069,13.7125,12.891,19.42063241,19.44547619,18.83254615,19.33241915,18.0370671,21.82375421,21.40141892,20.88974359,21.70444444,20.16681677,22.03899166,20.08295922,21.75851852,18.93125139,16.92174837,19.7,18.58359703,19.67206667,15.84212454,76.61394377,68.54231471,72.71046813,62.56284617,63.54900215,55.27222483,78.27817487,72.02386026,76.30421044,64.33892857,51.82375,60.76127141,58.67757238,55.7887441,65.26672178,75.1963539,69.96855093,74.27886057,68.00016026,58.57125,77.59450338,75.88884951,78.77157059,73.50741667,70.46859058,73.68825327,81.9802627,79.57357956,68.38473,68.90593223,NA,NA,NA,NA,NA,NA,NA,NA,NA,NA,NA,NA,NA,NA,NA,NA,NA,NA,NA,NA,NA,NA,NA,NA,NA,NA,NA,NA,NA,NA,7.831666667,11.0236,19.1516,0,1.6256,1.27,3.1496,10.160508,14.072108,0.1524,0,0.9652,0,0.4064,4.9784,7.7216,2.5908,1.6256,0,0.6096,5.2832,1.1176,6.9088,4.1656,0,9.398,14.478,0.4064,0.2032,0,3.90721014,3.559110868,5.135981816,1.798159437,3.296606147,3.420792181,2.789057071,4.061340912,2.916739074,1.759753269,3.049795513,3.785062535,3.412086576,3.701153529,2.969422958,2.687629543,3.394206245,4.132466563,3.842171182,4.463151662,1.719581798,3.264735535,2.807780317,2.578968322,2.107127066,3.166804204,2.282608128,2.044494735,5.017383638,3.283820423,46.99,55.118,95.758,0,8.128,6.35,15.748,50.80254,70.36054,0.762,0,4.826,0,2.032,24.892,38.608,12.954,8.128,0,3.048,26.416,5.588,34.544,20.828,0,46.99,72.39,2.032,1.016,0,0.5,0.2,0.8,0,0.4,0.4,0.8,0.6,0.8,0.2,0,0.2,0,0.2,0.4,0.4,0.4,0.2,0,0.2,0.4,0.2,0.4,0.4,0,0.2,0.6,0.4,0.4,0,39.7,41.35,22.3,26.7,51.65,32.8,21.35,54.6,58.1,57,63.65,81.15,80.25,82.5,77.8,66.95,81.1,79.8,79.95,89.15,74.15,81.65,70.35,78.9,71.35,62,67.85,62.85,78.05,61.4,14.35555556,14.57333333,14.76333333,14.95,15.13,15.28333333,15.43,15.56333333,15.67333333,15.77,15.84333333,15.88666667,15.91666667,15.92333333,15.91,15.85333333,15.79333333,15.70666667,15.59666667,15.47,15.32333333,15.17333333,15.00333333,14.83,14.64,14.45,14.25333333,14.05333333,13.84666667,13.63666667,184.2326389,275.4166667,186.1166667,261.3583333,262.9875,274.6666667,186.1666667,220.1,250.2916667,326.4333333,350.2708333,310.1666667,323.925,275.9458333,286.2916667,206.3416667,316.6875,262.725,311.8333333,278.8541667,272.3583333,264.5416667,186.9666667,282.5833333,268.3125,253.0166667,216.9916667,208.3,202.8916667,224.725,728.6666667,921.8,759.6,836,898,929.6,710.6,778.8,900.8,984.2,989.2,944.8,944.2,897.8,903.2,748.4,947.6,896,938.8,925.4,895.4,854.6,662,912.8,883.4,860.8,799.4,799.6,730.2,785.2
KSH2_2016,KSH2,2016,37.99671,-100.814872,Loam,37,41,22,8.333333333,7.32,5.92,13.1,11.56,11.64,12.34,18.68,18.34,18.88,19.82,18.36,19.12,20.9,17.2,20.24,19.78,18.2,19.22,20.56,16.02,15.54,16.84,17.12,18.56,20.03333333,NA,NA,NA,NA,17.14471154,16.06870715,10.11959294,17.81577809,19.6550054,19.00621373,21.78323333,26.13186667,24.93938571,26.05117659,24.21864874,22.7388704,25.44723333,26.83774241,23.87075,27.74,25.73239619,25.06793939,24.00415002,24.97036227,23.8775,22.52188746,22.1654919,21.18025165,23.29206588,24.78517949,NA,NA,NA,NA,25.45,24.9,14.54,24.34,28.52,25.9,30.24,33.98,32.42,33.9,32.56,29.9,32.66,33.8,32,35.78,32.78,32.56,30.56,31.66,31.66,29.88,29.02,27.34,30.14,32.4,NA,NA,NA,NA,6.609455128,6.973472669,4.860026555,13.52009091,12.14211276,11.69808824,10.3032,15.35982088,17.6163619,16.70405087,18.21613938,17.84171794,18.36025556,19.23529915,17.21325,18.15333333,18.54906322,17.71040909,18.21049159,19.23896154,13.60333333,13.04383903,14.92555672,17.05544061,17.565778,18.57035897,NA,NA,NA,NA,54.36502137,59.48050994,72.82830028,77.88088095,70.1147027,65.94960196,53.49050783,54.75511641,67.32745095,60.82033189,72.23907537,75.28140213,68.14882556,65.42564397,69.74417778,58.75741667,67.86893377,66.80237722,72.56564645,73.32616747,56.93158333,58.56220869,67.49092191,79.27411216,72.69629381,71.06310256,NA,NA,NA,NA,NA,NA,NA,NA,NA,NA,NA,NA,NA,NA,NA,NA,NA,NA,NA,NA,NA,NA,NA,NA,NA,NA,NA,NA,NA,NA,NA,NA,NA,NA,0,0.3048,1.6256,0,0,1.6256,0,0,10.16,0.6604,10.668,20.2184,0,0.4572,14.732,0,5.4864,1.8796,4.0132,3.5052,0,0,0.4572,0.6604,0.4064,0.931333333,NA,NA,NA,NA,5.464868261,5.292555619,5.507476454,7.258646399,5.294442318,4.785529569,4.449508169,6.543865242,5.596940847,4.78712364,4.652086399,4.614502157,4.319100343,6.131915977,5.942772528,4.8743569,4.551420366,4.576437717,4.02015188,4.659947654,3.905487367,4.901178339,5.110906269,3.342407371,7.038757487,5.603757148,NA,NA,NA,NA,0,1.524,8.128,0,0,8.128,0,0,50.8,3.302,53.34,101.092,0,2.286,73.66,0,27.432,9.398,20.066,17.526,0,0,2.286,3.302,2.032,2.794,0,0,0,0,0,0.4,0.4,0,0,0.2,0,0,0.4,0.2,0.8,0.6,0,0.2,0.4,0,0.4,0.4,0.8,0.2,0,0,0.2,0.4,0.2,0.4,0,0,0,0,47.75,37.25,11.35,44.15,50.55,44.15,55.6,71.7,70.3,72.2,74.25,68.4,71.4,77.25,68,75.6,73.9,69.4,68.3,75.3,65.05,59.95,61.55,60.85,67.55,45.05,0,0,0,0,14.95,15.13333333,15.27,15.40666667,15.52,15.61333333,15.69666667,15.75666667,15.79,15.8,15.79333333,15.76,15.7,15.62333333,15.52666667,15.41333333,15.28333333,15.14666667,14.99,14.81666667,14.64666667,14.46666667,14.27666667,14.08666667,13.89333333,13.72777778,NA,NA,NA,NA,325.1875,326.5541667,180.7708333,277.7583333,327.0958333,291.625,343.25,329.7583333,354.9083333,346.675,321.8291667,294.0458333,333.7,333.6541667,321.3166666,332.2,271.4583333,274.1875,214.9541666,288.9333333,301.5583333,290.1666667,236.5,175.65,261.6041667,198.4722222,NA,NA,NA,NA,990.8333333,981,705.2,923.4,1016.6,945.4,1002.2,976.4,1010.2,991.4,960.4,940.4,998.4,982,976.4,971.6,874.8,903.4,796.8,931.4,944.4,917.6,848.4,703,866.8,772,NA,NA,NA,NA
KSH3_2016,KSH3,2016,37.99671,-100.814872,Loam,36,42,22,8.333333333,7.32,5.92,13.1,11.56,11.64,12.34,18.68,18.34,18.88,19.82,18.36,19.12,20.9,17.2,20.24,19.78,18.2,19.22,20.56,16.02,15.54,16.84,17.12,18.56,20.03333333,NA,NA,NA,NA,17.14471154,16.06870715,10.11959294,17.81577809,19.6550054,19.00621373,21.78323333,26.13186667,24.93938571,26.05117659,24.21864874,22.7388704,25.44723333,26.83774241,23.87075,27.74,25.73239619,25.06793939,24.00415002,24.97036227,23.8775,22.52188746,22.1654919,21.18025165,23.29206588,24.78517949,NA,NA,NA,NA,25.45,24.9,14.54,24.34,28.52,25.9,30.24,33.98,32.42,33.9,32.56,29.9,32.66,33.8,32,35.78,32.78,32.56,30.56,31.66,31.66,29.88,29.02,27.34,30.14,32.4,NA,NA,NA,NA,6.609455128,6.973472669,4.860026555,13.52009091,12.14211276,11.69808824,10.3032,15.35982088,17.6163619,16.70405087,18.21613938,17.84171794,18.36025556,19.23529915,17.21325,18.15333333,18.54906322,17.71040909,18.21049159,19.23896154,13.60333333,13.04383903,14.92555672,17.05544061,17.565778,18.57035897,NA,NA,NA,NA,54.36502137,59.48050994,72.82830028,77.88088095,70.1147027,65.94960196,53.49050783,54.75511641,67.32745095,60.82033189,72.23907537,75.28140213,68.14882556,65.42564397,69.74417778,58.75741667,67.86893377,66.80237722,72.56564645,73.32616747,56.93158333,58.56220869,67.49092191,79.27411216,72.69629381,71.06310256,NA,NA,NA,NA,NA,NA,NA,NA,NA,NA,NA,NA,NA,NA,NA,NA,NA,NA,NA,NA,NA,NA,NA,NA,NA,NA,NA,NA,NA,NA,NA,NA,NA,NA,0,0.3048,1.6256,0,0,1.6256,0,0,10.16,0.6604,10.668,20.2184,0,0.4572,14.732,0,5.4864,1.8796,4.0132,3.5052,0,0,0.4572,0.6604,0.4064,0.931333333,NA,NA,NA,NA,5.464868261,5.292555619,5.507476454,7.258646399,5.294442318,4.785529569,4.449508169,6.543865242,5.596940847,4.78712364,4.652086399,4.614502157,4.319100343,6.131915977,5.942772528,4.8743569,4.551420366,4.576437717,4.02015188,4.659947654,3.905487367,4.901178339,5.110906269,3.342407371,7.038757487,5.603757148,NA,NA,NA,NA,0,1.524,8.128,0,0,8.128,0,0,50.8,3.302,53.34,101.092,0,2.286,73.66,0,27.432,9.398,20.066,17.526,0,0,2.286,3.302,2.032,2.794,0,0,0,0,0,0.4,0.4,0,0,0.2,0,0,0.4,0.2,0.8,0.6,0,0.2,0.4,0,0.4,0.4,0.8,0.2,0,0,0.2,0.4,0.2,0.4,0,0,0,0,47.75,37.25,11.35,44.15,50.55,44.15,55.6,71.7,70.3,72.2,74.25,68.4,71.4,77.25,68,75.6,73.9,69.4,68.3,75.3,65.05,59.95,61.55,60.85,67.55,45.05,0,0,0,0,14.95,15.13333333,15.27,15.40666667,15.52,15.61333333,15.69666667,15.75666667,15.79,15.8,15.79333333,15.76,15.7,15.62333333,15.52666667,15.41333333,15.28333333,15.14666667,14.99,14.81666667,14.64666667,14.46666667,14.27666667,14.08666667,13.89333333,13.72777778,NA,NA,NA,NA,325.1875,326.5541667,180.7708333,277.7583333,327.0958333,291.625,343.25,329.7583333,354.9083333,346.675,321.8291667,294.0458333,333.7,333.6541667,321.3166666,332.2,271.4583333,274.1875,214.9541666,288.9333333,301.5583333,290.1666667,236.5,175.65,261.6041667,198.4722222,NA,NA,NA,NA,990.8333333,981,705.2,923.4,1016.6,945.4,1002.2,976.4,1010.2,991.4,960.4,940.4,998.4,982,976.4,971.6,874.8,903.4,796.8,931.4,944.4,917.6,848.4,703,866.8,772,NA,NA,NA,NA
MIH1_2016,MIH1,2016,42.689878,-84.497939,Sandy Loam,54,29,17,17.03333333,14.14,12.2,13.02,15.54,15.56,16.34,10.78,17.54,17.92,17.12,19.54,18.86,17.18,18.02,17.82,19.66,16.78,16.68,17.56,13.8,17.66,12.76,14.66,12.68,11.88,11.78,6.68,8.24,10.54,23.16825397,20.8,16.94029631,20.22021739,21.34342657,23.01423077,22.6543359,19.47422339,23.41296154,23.21069406,22.07956731,25.5487619,24.37161538,21.43268803,24.659,24.86703592,22.88105577,21.47445408,21.98940476,21.45342982,19.95935897,21.35390759,18.56550207,20.09752222,17.23131848,14.43067928,16.0694211,12.65183333,13.49533887,15.2691181,28.68333333,26.9,22.36,26.58,27.34,28.76,28.64,26,29.7,29.44,27,31.78,30.58,26.34,30.78,31.66,28.32,26.1,26.78,26.44,26.78,24.98,24.56,26.44,22.54,17.68,22.46,19.02,18.66,19.22,14.88606322,11.77,10.80876792,10.04126812,12.94145512,11.97211538,11.94936667,8.714690476,16.45602564,16.51756925,14.61138575,17.32890476,18.0284641,16.31318376,15.30119565,17.09946731,19.21108666,16.33506787,17.1289252,17.0373616,14.23291667,17.7559517,12.25203416,14.82258889,12.23784469,10.81087737,13.08998506,6.3845,9.262121886,10.2774063,61.76713225,59.32791667,70.20873878,54.24171739,63.18523026,52.58159615,54.35654841,56.80029462,67.22566538,68.17823055,64.67284408,63.47669213,70.39314594,74.53086667,59.40252433,65.6214375,81.08931165,74.28944344,75.46724132,77.33184932,71.73256178,81.04994424,68.52566667,74.31660111,74.3285717,80.22512769,83.75929337,67.51504493,76.93160582,73.28470465,NA,NA,NA,NA,NA,NA,NA,NA,NA,NA,NA,NA,NA,NA,NA,NA,NA,NA,NA,NA,NA,NA,NA,NA,NA,NA,NA,NA,NA,NA,1.397423333,0,1.2192,0.1524,1.5748,0,0.0508,1.524,6.35,2.4384,0,2.0828,4.6736,0.762,0,5.2324,21.844508,3.4036,2.4384,1.1176,0,3.861308,0.1524,3.5052,0.914908,9.9568,3.2004,0,7.366508,0.0508,3.968789477,2.529349667,4.411360373,3.188393023,2.853593548,3.628149287,3.425949936,2.267211459,3.641152789,3.559881184,4.427409427,3.141550717,2.755280493,2.289770458,2.58713142,2.332688308,3.252345498,3.518968651,3.241199333,2.464252666,2.632413877,2.929013388,3.05351552,2.192472569,3.284452784,4.60973594,2.450871739,3.587650443,4.226446417,3.991674038,8.38454,0,6.096,0.762,7.874,0,0.254,7.62,31.75,12.192,0,10.414,23.368,3.81,0,26.162,109.22254,17.018,12.192,5.588,0,19.30654,0.762,17.526,4.57454,49.784,16.002,0,36.83254,0.254,0.5,0,0.6,0.2,0.4,0,0.2,0.2,0.4,0.4,0,0.2,0.4,0.2,0,0.2,0.8,0.4,0.4,0.4,0,0.8,0.2,0.4,0.2,0.8,0.4,0,0.4,0.2,77.15,52.6,37.8,49.25,56.35,59.15,60.6,42.5,66.65,66.7,60.3,73.3,72.15,58.8,68.4,69,69.95,57.2,58.65,60,50.6,56.6,43.3,52.75,38.05,23.9,35.9,23.4,25.3,27.75,16,16.12666667,16.21666667,16.28333333,16.32333333,16.32333333,16.30666667,16.26333333,16.19,16.09666667,15.97,15.83333333,15.66666667,15.49666667,15.31,15.10333333,14.89666667,14.68666667,14.45,14.22666667,14,13.75666667,13.52666667,13.28333333,13.04333333,12.80666667,12.57,12.33,12.09666667,11.86333333,284.7638889,309.6375,239.95,284.5375,257.9958333,304.7708333,286.9333333,316.8375,277.4833334,267.225,255.6916667,302.0208333,263.0541667,223.60625,287.6833333,229.2375,219.8458333,223.775,194.8333333,231.75,236.0333333,167.925,196.8375,192.125,151.3666667,85.60416666,146.0208333,164.7333333,120.6333333,96.25416667,883.3333333,927.6,846.4,861.2,807.8,943.8,830.8,946.8,886.8,808.2,852.8,883.4,874.6,775.6,877.2,830.8,741.8,779,725.4,793.4,813.8,621.8,719.4,693.8,635.2,457.2,630.6,645.2,494.6,450.2
MNH1_2016,MNH1,2016,44.066804,-93.533063,"96.6% Clay Loam, 3.4% Loam",42,30,28,7.333333333,17,14.8,13.2,15.6,18.4,17,16.2,14,14.4,17.4,16,19.4,19.8,17.4,19,15.8,16.8,16.6,14.8,15.6,12.4,17.4,11.8,13.6,16.4,8.4,10.2,3.6,5.2,16.20898539,20.70970266,19.02836463,18.46033324,21.64918301,21.94092332,23.33434343,22.21111111,18.95277778,20.79722222,22.30637715,21.02846569,24.35833333,24.74166667,21.22053057,23.62533,22.08474849,21.43722629,21.10867203,19.94738095,20.49887995,17.99809971,21.16388889,17.23145428,18.79954617,19.86226023,13.56640131,16.34647887,9.354499218,10.90494852,23.33333333,25.6,23.6,24.6,28.8,27,29.2,28,24.2,27,27,25.6,29.6,29.2,25.4,28,28.2,26.6,26,25.2,25.4,24,25.2,23.2,25,24.8,19,23.4,15.4,16.8,1.251369327,13.82638634,13.34464006,10.32375495,13.73562092,16.84796557,15.07323232,15.54722222,12.33063492,14.39444444,17.48161189,15.14905956,19.68611111,20.08888889,17.17450179,19.33580833,17.07077577,17.50952239,17.45,14.75428571,16.78796222,12.33783926,17.33603175,10.66536217,12.89776101,15.61891795,6.980332332,10.13661972,2.998161189,4.799491634,40.74534461,67.18635364,72.36136972,62.40226494,63.79127288,73.67705908,62.10780051,68.63372222,67.30879444,69.5877754,75.48794053,70.71203474,76.39030556,76.83066667,78.88154964,77.98218837,75.02108206,80.14874383,80.76008051,73.71065159,80.45305511,71.84604131,79.74430635,67.51038806,71.5441832,78.932867,67.84263423,69.26699335,67.98864789,67.84445309,NA,NA,NA,NA,NA,NA,NA,NA,NA,NA,NA,NA,NA,NA,NA,NA,NA,NA,NA,NA,NA,NA,NA,NA,NA,NA,NA,NA,NA,NA,0,7.0104,3.7084,2.8956,5.6388,6.2484,1.4224,0.5588,2.6416,4.572,20.1168,0.508,9.2456,1.524,4.6228,1.4224,0.3556,17.1196,11.938,4.6228,0.8128,0,12.954,0,5.08,20.3708,1.7272,0.1016,3.8608,0.3556,3.15759461,4.013476152,3.705023273,4.59549728,3.915154207,4.504303403,4.031370255,4.061249578,2.495665833,2.4748431,3.718125896,3.696874143,3.386756333,2.5336367,2.32885937,2.802539313,2.299610109,1.736557984,1.892650172,3.72641186,1.744249237,3.159798316,3.035056284,3.65170742,3.237546871,4.69309906,4.745185872,2.83642604,3.074708611,5.448309557,0,35.052,18.542,14.478,28.194,31.242,7.112,2.794,13.208,22.86,100.584,2.54,46.228,7.62,23.114,7.112,1.778,85.598,59.69,23.114,4.064,0,64.77,0,25.4,101.854,8.636,0.508,19.304,1.778,0,1,0.6,0.4,0.6,0.2,0.2,0.2,0.2,0.2,0.6,0.4,0.4,0.2,0.6,0.2,0.2,0.6,1,0.4,0.4,0,0.8,0,0.2,0.4,0.2,0.2,0.6,0.4,40,56.5,46,44.5,58,63.5,64.5,59,45.5,53,60.5,54,70.5,71,57,67.5,59.5,58.5,56.5,50,52.5,41,56.5,38,46.5,53,23.5,37.5,14.5,17.5,15.94444444,16.10666667,16.23666667,16.34,16.42333333,16.47666667,16.49666667,16.48333333,16.44666667,16.38,16.29,16.17,16.03333333,15.86666667,15.7,15.49333333,15.29666667,15.08,14.85,14.62,14.38333333,14.13666667,13.89,13.64666667,13.39666667,13.14,12.89,12.64333333,12.39333333,12.14666667,328.8090278,222.6,252.0458333,281.1833333,310.5791667,265.8916667,333.0541667,253.2916667,306.6291667,302.9541667,283.1875,286.35,286.4625,259.7583333,204.9958333,259.3166667,244.625,241.3666667,215.6208333,225.6333333,205.2708333,211.9875,167.1666667,209.1458333,162.4625,97.21666667,171.4708333,181.1625,164.1583333,107.775,957.3333333,729.8,885,918,920.8,883.6,918.8,787.6,880.4,897.2,884.6,941,894.4,829.2,763.8,892.4,844.8,766.2,840,765.6,681,745.6,706.2,746.6,614.6,459.2,658.8,672.4,637.2,495.2
MOH1_2016,MOH1,2016,38.89592,-92.20742,100% Silt Loam,21,56,23,16.56666667,17.9,16,18.68,22.68,21.1,22.32,18.4,19.58,20.9,20.76,23.34,22.98,20.22,21.44,21.44,20.34,18.34,19.54,21.46,15.88,20.56,16.12,17.64,18.9,11.76,14.72,NA,NA,NA,21.11488634,23.02795155,21.35878703,25.6257,27.93173077,26.5146261,26.82805683,22.10901709,22.37653281,26.00544355,24.97686074,28.17882821,27.23720044,23.43507164,25.22295635,25.61369796,23.49934122,23.21888632,23.72300614,24.91969014,21.15166667,24.40974763,21.6125,22.42735152,24.51839744,17.08851111,18.69251128,NA,NA,NA,27.21666667,28.54,26.78,31.54,33.8,33.14,33,26.88,27.44,31.22,30.46,33.34,32.22,28.1,30.36,30.34,27.68,28.24,28.54,30,27.1,28.66,27.68,29,30.24,23.2,23.34,NA,NA,NA,16.89974952,16.39626676,14.40328576,17.9123,20.43012821,19.82056696,20.8672932,17.11848433,20.64677463,21.39449677,21.22030416,23.68824615,23.22614379,20.44517496,22.05402778,22.00434483,20.85400084,19.43833544,20.44951306,22.1938773,16.10916667,21.35201062,17.29128205,19.12099697,19.58602564,9.862959259,14.78897901,NA,NA,NA,79.16165527,69.05810061,67.73835251,64.67033667,66.97244398,69.30319062,73.03716257,75.51911724,90.56419556,77.20773756,80.88178537,77.93922256,80.38023094,84.58455015,83.62385913,81.34086341,86.19452308,81.10355439,83.32145251,86.01443181,75.17751449,84.62881311,78.40837051,83.67918364,75.81617308,65.96987963,79.68622457,NA,NA,NA,NA,NA,NA,NA,NA,NA,NA,NA,NA,NA,NA,NA,NA,NA,NA,NA,NA,NA,NA,NA,NA,NA,NA,NA,NA,NA,NA,NA,NA,NA,10.32933333,0.1016,0.2032,0,5.08,3.5052,1.8288,10.0584,21.8948,5.08,6.0452,1.9812,8.2804,8.382,14.3256,5.588,1.8796,0.9144,0.508,2.032,0,33.8836,0.3048,2.8956,0.1016,0.0508,1.3716,NA,NA,NA,4.35413886,2.551216493,3.770232333,3.332739713,3.14891918,4.065951485,3.083955661,3.30077399,3.488236342,3.703790474,3.725435125,3.224957422,2.771636196,2.61081771,3.542873271,3.091798797,2.922539501,3.0940132,3.217326051,2.225482166,3.402413325,3.915771603,3.109609039,2.576712155,3.208031392,4.413702344,3.240166128,NA,NA,NA,61.976,0.508,1.016,0,25.4,17.526,9.144,50.292,109.474,25.4,30.226,9.906,41.402,41.91,71.628,27.94,9.398,4.572,2.54,10.16,0,169.418,1.524,14.478,0.508,0.254,6.858,0,0,0,0.666666667,0.2,0.2,0,0,0.4,0.2,0.4,0.8,0.4,0.4,0.4,0.2,0.4,0.6,0.4,0.4,0.4,0.4,0.4,0,0.6,0.2,0.2,0.2,0.2,0.2,0,0,0,70.8,66.1,56.4,70.6,81.7,77.75,80.8,63.2,65.6,76.95,75.8,83.35,81.6,70.25,76.95,75.55,69.75,66.15,68.55,76.7,56.9,70.55,59.2,64.9,71.15,37.4,45.15,0,0,0,15.59722222,15.71333333,15.79333333,15.85333333,15.88666667,15.90333333,15.88333333,15.85333333,15.8,15.72,15.61666667,15.5,15.36666667,15.21666667,15.05,14.88666667,14.70333333,14.51666667,14.32,14.12333333,13.92,13.71666667,13.50666667,13.30333333,13.09,12.88333333,12.67666667,NA,NA,NA,250.4201389,302.0458333,308.55,334.9583334,340.4583333,318.7708333,293.6833333,242.5625,195.7,315.1333333,280.0458333,292.4791667,291.5,250.0020833,266.0958333,224.6333333,259.6833333,251.0416667,185.1541667,213.6041667,253.9791667,201.9708333,186.6375,226.5208333,222.9166667,179.4958333,153.7375,NA,NA,NA,855.1666667,948.8,910.4,942.2,971,963.6,951.4,782.8,740,955.4,893.2,921.4,879.2,861.6,889.8,848.8,830.8,904.6,710,794.2,836,729.4,729.6,800.6,764,670,596.6,NA,NA,NA
NCH1_2016,NCH1,2016,35.29922,-77.570362,Sandy Loam,70,22,8,6.9,12.82,15.6,15.78,14.74,15.16,12.22,13.16,18.84,20.76,18.98,18.58,20.04,19.96,20.32,22.4,22.66,22.22,22.2,21.5,25.04,22.78,23.02,23.12,24.3,21.8,19.96,21.08,17.9,22.04,13.0850271,16.85445993,19.46520674,18.72520325,18.43668815,19.66741994,16.47113054,17.51587689,22.47432007,23.57704878,22.41549013,23.57088444,23.26160279,24.65875726,23.69429679,25.10077816,26.16319588,25.69271777,25.58966202,25.66299062,28.56350938,25.56901394,25.66965782,26.37753987,27.58284962,24.83859466,24.03136812,24.01268328,21.2144367,25.36941928,24.33333333,25.2,25.8,23.9,26.2,26.26,22.4,25,29.6,30.2,29.6,31.2,30.2,32.6,30.6,31.6,34.4,33.4,33.2,33.2,35.8,33.8,32.2,33.2,34.6,31.6,32.2,30.2,28.8,32,3.815176152,12.59767712,14.9584158,16.88752613,13.31780372,15.04795918,12.6670967,14.12606272,18.58961331,21.21082404,18.11452381,16.91256272,18.96109175,18.40547038,20.0858289,22.4216957,22.59196932,22.15069686,22.56736469,21.76116211,23.25902158,22.92597619,23.21986152,23.66411013,23.33603133,21.48393728,20.57163982,22.03615856,17.90535424,21.16464576,58.70787553,78.93440418,77.68694199,89.93911266,75.41834878,77.60039423,80.97993004,83.64446458,81.06819305,88.04730761,79.75720981,69.53766086,79.46699652,70.51330894,82.73238976,86.226964,82.77458214,83.11950755,84.71438978,81.30703041,75.14964153,86.73448124,87.425259,86.58059543,79.58189273,83.73304762,83.16810003,89.99826667,83.29718699,79.36066086,NA,NA,NA,NA,NA,NA,NA,NA,NA,NA,NA,NA,NA,NA,NA,NA,NA,NA,NA,NA,NA,NA,NA,NA,NA,NA,NA,NA,NA,NA,0,0.762,1.8288,6.096,0.0508,0.2032,0.0508,4.064,0,1.778,3.6576,0,0.2032,2.54,4.7752,0.2032,1.0668,1.1176,0.3048,0,0,0,0,0,0,0.3048,0,2.0828,2.3876,0,2.900074982,2.578610817,3.186123173,2.628862615,2.089138562,2.23032429,2.346239764,2.012306559,2.059270782,1.92813432,2.384624201,2.389622255,2.614403213,3.014187743,1.541904888,2.125418515,3.070093496,1.326859223,2.410247814,1.403551733,3.018558885,1.92143639,1.827528643,1.402107513,2.441372007,1.433094,1.140748201,1.893315522,2.866665997,4.766583571,0,3.81,9.144,30.48,0.254,1.016,0.254,20.32,0,8.89,18.288,0,1.016,12.7,23.876,1.016,5.334,5.588,1.524,0,0,0,0,0,0,1.524,0,10.414,11.938,0,0,0.4,0.4,0.8,0.2,0.4,0.2,0.4,0,0.2,0.6,0,0.2,0,0.2,0.2,0.6,0.2,0.2,0,0,0,0,0,0,0.6,0,0.4,0.2,0,45,45.95,53,49.2,52,54.2,38.3,44.9,70.1,73.9,69.45,69.95,73.1,74.9,74.8,81,81.65,80.55,80.5,78.75,87.6,81.95,82.55,82.8,85.75,79.5,74.4,74.7,65.25,79.6,14.19166667,14.37333333,14.53666667,14.7,14.84,14.98333333,15.11333333,15.22,15.32,15.40333333,15.46333333,15.51,15.53333333,15.53666667,15.51666667,15.48333333,15.42,15.34666667,15.25666667,15.14666667,15.02666667,14.89,14.74333333,14.59666667,14.43333333,14.27333333,14.1,13.92333333,13.74333333,13.56666667,292.6423611,265.2333333,241.4,178.2833333,267.6,277.2625,196.8375,244.9541666,284.4916667,262,293.2208333,334.55,292.4625,293.6791667,272.6708333,243.2041667,316.0291667,305.0041666,265.6833333,313.6125,299.7791667,205.8583333,235.0375,274.9833333,250.1791666,275.6916667,231.6375,171.8,261.3291667,243.5041667,935.6666667,905.4,802.8,784.8,919,926.4,687.2,871.6,947,841.8,949.4,990.6,927.4,884.4,923.4,863.6,963.8,914.2,881,949.6,926.6,864.2,894.8,930.6,869.2,914,835.6,649.4,880.4,832.4
NEH1_2016,NEH1,2016,41.14563,-96.497956,"78.7% Silty Clay Loam, 12.3% Loam, 9.1% Silt Loam",33.11231,37.63863,29.34906,12.05,7.62,8.7,15.4,15.38,15.36,17.4,21.58,20.78,19.74,19.34,16.46,20.44,19.34,20.52,22.6,17.58,20.28,18.06,19.14,17.72,14.34,15.98,15.18,19.42,12.76,13.12,18.04,10.4,7.56,18.38101852,12.25027778,14.7425,20.80466354,20.68861111,22.59509979,25.3987011,28.14493876,27.08919192,25.37777778,24.69944444,20.76027778,25.66388889,23.86444444,25.57471831,27.27111111,22.8625,24.88861111,22.37513285,24.43722222,23.03888889,20.22055556,20.49805556,19.87,23.82830203,17.78333725,18.71638889,24.12666667,17.11611111,14.99805556,24.43333333,17.82,21.1,27.1,26.9,29.64,32.5,35.06,32.62,31.34,30.52,25.92,30.88,29.06,31.1,32.2,28.3,30.1,27.1,30.3,29.12,26.68,26.52,25.3,29.28,23.76,25.64,31.3,24.1,23.42,9.686574074,3.247222222,7.839444444,15.18688576,14.00444444,9.887110983,12.21631847,17.98629176,19.68843434,18.75555556,17.43666667,16.89194444,20.44361111,18.71166667,21.67706573,21.835,18.09138889,21.40916667,18.45205314,19.82138889,19.59777778,15.34305556,17.64944444,16.25527778,19.85888498,13.63594288,14.79416667,18.34916667,9.254444444,9.648888889,61.32450117,57.79863889,66.95772613,72.3073838,69.1405,49.02845737,46.90448083,57.99791459,66.21274495,68.24102778,67.19376582,80.64307668,74.68981699,74.83290792,80.08382937,73.55952621,76.56909099,81.99539045,79.74603744,77.27836933,82.22902778,75.74182551,84.92158333,81.52241667,79.78483764,79.03520931,80.61430556,73.00863889,64.90729841,74.25727778,NA,NA,NA,NA,NA,NA,NA,NA,NA,NA,NA,NA,NA,NA,NA,NA,NA,NA,NA,NA,NA,NA,NA,NA,NA,NA,NA,NA,NA,NA,14.986,1.6256,0,8.382,2.286,0.254,0.1524,0.4064,10.668,3.302,2.4384,11.938,4.6228,2.032,1.016,0,0,6.9088,0,6.1976,3.81,8.0264,0.6604,0.9144,3.556,10.922,2.9464,0.6604,4.0132,0,5.234960809,4.851492722,3.345858438,5.030139238,3.476784033,4.5073666,5.029032258,3.467614035,4.023965379,3.8711911,2.703339339,2.951874036,3.469638978,3.102061967,3.560440651,2.594822528,1.922655255,3.451444245,2.044790638,2.774737039,2.347865256,3.660160375,1.797695978,2.467902189,3.72730377,3.839310063,2.596513189,3.438200733,3.284969913,2.415028778,89.916,8.128,0,41.91,11.43,1.27,0.762,2.032,53.34,16.51,12.192,59.69,23.114,10.16,5.08,0,0,34.544,0,30.988,19.05,40.132,3.302,4.572,17.78,54.61,14.732,3.302,20.066,0,0.333333333,0.2,0,0.8,0.6,0.2,0.2,0.2,0.4,0.4,0.2,0.2,0.6,0.6,0.2,0,0,0.6,0,0.6,0.4,0.4,0.2,0.4,0.6,0.6,0.2,0.2,0.4,0,49.15,19.75,28.55,56.25,55.05,60.35,67.25,78.95,75.55,72.9,72.6,53.7,75.95,68.7,76,80.9,64.7,74.45,61.9,70.2,66.3,52.45,55.8,51.2,69.7,41.4,46.9,68.8,41.25,33.55,15.26388889,15.44666667,15.59,15.74,15.85,15.95,16.02666667,16.07,16.09666667,16.1,16.07,16.02333333,15.94333333,15.85,15.73,15.59666667,15.43333333,15.28333333,15.09666667,14.90666667,14.70666667,14.50333333,14.29,14.07333333,13.85666667,13.63333333,13.40666667,13.19333333,12.97333333,12.73666667,269.9861111,269.2208333,236.5458333,229.4333333,272.2166667,339.7541667,346.3625,316.425,329.4041667,290.5708333,324.0833333,193.5708333,319.2375,272.2708333,256.7208333,267.9625,275.025,280.2333333,249.8166667,278.5375,228.4208333,226.5875,193.7416666,228.0291667,181.7666667,171.1458333,224.6208333,176.1916667,226.1125,164.8125,883.5,867,809,903.8,913.4,978.8,961.4,921,936.6,917.6,965.4,693.8,945.8,855.4,874.6,887.2,911.4,901,864.6,881,827.2,825.8,723,802.4,735.6,594.8,759.4,646,774.4,616
NEH4_2016,NEH4,2016,41.14563,-96.497956,"79.6% Silty Clay Loam, 20.4% Silt Loam",12.42371,58.68057,28.89571,19.53333333,21.36,19.8,19.38,17.46,18.6,21.02,18.24,22.92,19.92,18.6,19.56,19.68,16.44,16.24,14.64,18.16,15.14,17.4,12.82,13.58,18.62,6.58,9.74,5.2,4.82,8.82,4,7.72,6.477777778,27.20123239,27.93496402,25.83861111,25.07388889,22.10194444,23.39166667,25.93166667,23.13833333,27.57805164,25.105,22.77611111,24.16902174,24.59527778,22.14527778,21.6125,19.96527778,22.23083333,20.54802426,21.80527778,17.52528169,20.26611111,23.37944444,14.60111111,16.01888889,12.10416667,11.56916667,14.86722222,11.60277778,13.7325,13.76984568,34.16666667,35,31.14,31.08,27.16,28.96,31.06,28.54,32.82,30.34,27.92,29,30.06,28.38,27.44,25.88,27.74,26.96,26.92,23.52,28.56,28.94,23.18,22.86,19.7,18.86,22.16,21,21.66,22.38444444,14.82470983,18.8947261,19.455,18.08972222,15.9025,19.25277778,20.48027778,18.82416667,23.04734351,19.82527778,18.74,20.14038647,20.8375,17.895,17.38,16.23416667,19.19611111,16.22416275,18.05583333,14.33122066,15.10333333,17.33027778,6.664444444,11.20027778,5.745277778,7.109444444,9.675277778,4.721111111,9.086944444,6.096666667,49.3441282,61.45543654,69.60380556,67.88558696,70.9077039,79.09441275,73.69776023,78.45757183,77.38905399,74.53496618,79.40193192,79.46031522,80.75870266,78.77769444,78.70063889,80.75938106,84.30275,78.01964867,80.96055008,83.46643153,75.27083333,71.72841667,64.64640952,76.54258333,70.63697222,76.16502034,74.33537754,67.90746674,76.31716667,64.59869757,NA,NA,NA,NA,NA,NA,NA,NA,NA,NA,NA,NA,NA,NA,NA,NA,NA,NA,NA,NA,NA,NA,NA,NA,NA,NA,NA,NA,NA,NA,0.127,0.4064,13.9192,0.0508,14.3764,4.572,1.6256,0.4572,1.016,0,2.032,4.8768,5.0292,3.302,1.6764,8.0264,0.7112,1.1176,6.9088,7.3152,2.9464,4.6736,0,2.4892,2.8956,0.0508,0.2032,0,0.0508,0,4.840892546,3.264765816,4.0126632,3.228011838,3.151609536,2.915283301,3.852800348,2.484011998,3.700752866,2.097477657,3.059412154,2.417762538,2.753301873,2.139229633,2.515059556,3.370071119,1.664797944,3.966431672,2.833245987,3.682118841,2.635096489,3.846897911,2.404699069,3.15576089,3.872620111,4.16001236,2.870561292,3.355297962,3.804027578,2.923535337,0.762,2.032,69.596,0.254,71.882,22.86,8.128,2.286,5.08,0,10.16,24.384,25.146,16.51,8.382,40.132,3.556,5.588,34.544,36.576,14.732,23.368,0,12.446,14.478,0.254,1.016,0,0.254,0,0.166666667,0.2,0.6,0.2,0.4,0.4,0.6,0.2,0.2,0,0.2,0.4,0.4,0.4,0.2,0.4,0.4,0.4,0.6,0.4,0.2,0.6,0,0.2,0.2,0.2,0.2,0,0.2,0,87.4,78.4,73.1,72,61.2,65.75,77.25,65.8,82.3,73.9,66.3,69.9,69.95,62.05,58.4,51.2,64.3,54.25,59.75,40.95,53.65,66.05,32.95,34.7,24.3,24.05,31.15,27.5,30.95,30.96111111,16.04166667,16.08333333,16.10333333,16.09,16.05333333,15.99333333,15.91,15.80333333,15.68,15.53333333,15.37333333,15.21,15.02333333,14.82666667,14.62666667,14.42,14.20333333,13.98666667,13.76666667,13.54333333,13.31666667,13.11,12.87666667,12.65,12.43,12.21333333,11.99333333,11.78666667,11.57333333,11.37333333,340,323.2583333,318.2291667,291.3875,260.9791667,254.5708333,321.5791667,240.9541667,282.7208333,271.5208333,255.9458333,263.6375,267.4958333,279,237.2083333,182.4958333,224.7541667,214.8958333,195.9,143.2916667,223.7,188.5458333,215.3625,131.0083333,166.4,133.7041667,168.1833333,148.5666667,115.5833333,123.9458333,953.3333333,927.4,912.2,944.4,816.2,834,945.4,835.8,886.6,889.4,900.6,896.8,862.8,880.4,834.6,731.2,803,778.4,751.8,535.6,753.2,685.8,741.2,531.4,654,616.8,646.8,612.2,535.4,515.4
NYH1_2016,NYH1,2016,NA,NA,100% Silt Loam,21.88,65.24,12.88,5.9,14.42,13.82,12.4,8.52,10.52,11.22,14.12,10.84,15.54,15.2,16.44,14.78,15.78,16.3,16,17.54,19.38,14.48,14.74,13.66,9.56,15.7,7.54,14.86,7.02,9.6,9.14,4.48,4.46,13.15224336,22.36200265,19.90321905,17.1828335,14.16887235,18.24229035,19.46646364,21.30227233,17.78493757,22.67128986,20.94152857,22.23565128,22.27846961,21.96256086,20.75011881,22.47337716,24.23049451,23.43559079,20.7168807,21.22813704,19.76418497,16.53087564,21.99158793,15.33404978,19.42264881,14.0523786,13.10623908,13.98503166,10.66849055,11.06548571,21.11666667,29.22,26.32,22,19.94,25.78,26.9,28.78,25.34,30.12,27.68,28.56,29.9,29,26.52,28.32,30.78,28.12,26.1,27.9,25.58,24.76,28.56,23.66,25.68,21.14,17.88,20.46,16.68,17.9,6.592814915,15.41008836,13.94609231,12.20559984,6.711918246,10.43553256,10.93233939,13.82040356,11.33823767,16.73005217,15.64842857,16.64285897,13.21596462,16.63727816,17.73966159,16.6492626,17.61869963,19.89036417,16.30369493,16.84848889,16.1091763,12.40388141,18.31799713,10.44055172,15.03270605,8.732183278,9.957125287,11.3952,6.30526057,6.105828571,69.4837596,67.96346958,71.76995974,75.00590228,62.75234309,65.24135459,61.3052903,65.94322304,69.90585061,72.0913014,74.77040443,73.33526846,60.43901949,75.36788322,84.40338226,71.66732719,69.74791625,81.45954898,77.87148678,78.40384,81.18111975,79.81440974,81.39985698,75.8507254,79.28538815,73.24630595,83.28383874,85.96500819,77.10315388,73.72951714,NA,NA,NA,NA,NA,NA,NA,NA,NA,NA,NA,NA,NA,NA,NA,NA,NA,NA,NA,NA,NA,NA,NA,NA,NA,NA,NA,NA,NA,NA,0.042333333,0.3556,0.8128,4.5212,0.0508,0.0508,0.0508,0.1016,0.508,1.1176,0.9652,1.3208,0.254,2.4892,3.6068,0.9652,11.7348,4.9784,3.81,0.762,0.965708,0,4.7752,0,7.7724,0.254,6.299708,0.0508,2.0828,1.778,2.076750092,2.54805841,2.864052278,3.856639684,5.960292075,2.516067437,3.269961956,2.934953177,3.148004642,2.318650095,3.2223068,2.784108318,3.614486137,2.178635915,1.852028741,3.549612933,3.097114047,2.686172388,2.854322429,2.559332518,2.17710605,1.921758325,2.679502016,2.562224207,2.385146584,3.112407994,2.739342291,2.085931602,3.292745847,3.649263091,0.254,1.778,4.064,22.606,0.254,0.254,0.254,0.508,2.54,5.588,4.826,6.604,1.27,12.446,18.034,4.826,58.674,24.892,19.05,3.81,4.82854,0,23.876,0,38.862,1.27,31.49854,0.254,10.414,8.89,0.166666667,0.2,0.2,0.4,0.2,0.2,0.2,0.2,0.2,0.4,0.4,0.6,0.2,0.2,0.4,0.2,0.6,0.6,0.2,0.4,0.6,0,0.6,0,0.4,0.2,0.8,0.2,0.6,0.4,33.35,59.5,51.2,37.65,25.85,44.15,45.85,58.35,41.3,62.75,55.55,62.2,57.8,61.4,57.05,60.8,67.45,66.5,51.45,57.1,47.8,38.6,59.8,34.15,51.35,29.8,20.8,27.5,17.25,20.85,15.85833333,16.01333333,16.12666667,16.21666667,16.28333333,16.32333333,16.33333333,16.31,16.26666667,16.19666667,16.09666667,15.97666667,15.83333333,15.66666667,15.49666667,15.31,15.11333333,14.89666667,14.68666667,14.45666667,14.22666667,14.00333333,13.75666667,13.52666667,13.28666667,13.04333333,12.81,12.57,12.33,12.1,271.9409722,247.9666667,302.1708333,228.8416667,259.1833333,336,321.0708333,315.4958333,266.4625,270.1416667,251.5416667,261.8541667,298.1958333,258.2041667,231.34375,294.6125,246.15,200.7708333,241.05,249.0416667,232.3791667,258.0916667,212.0625,192.7875,213.1125,179.1083333,124.0166667,158.4541667,150.4166667,128.3958333,893.5,838,886.6,796.8,854.8,973.6,966.4,941.4,872.4,881,859.2,892.2,897,866.6,804.2,914,862.8,734.6,803.2,822.2,802.8,821.8,734.2,698.6,721.2,660.2,528.4,645.8,593.4,563.8
NYH2_2016,NYH2,2016,42.72543,-76.6551,Loam,43,36,21,4.05,1.46,7.84,16.2,13.16,11.4,8.16,11.66,10.22,15.18,10.66,17.2,15.44,14.76,15.22,15.9,16.7,15.04,19.44,18.38,12.94,16.38,12.1,10.34,14.64,8.82,14.32,6.24,10.24,8.54,11.48895414,9.876466667,15.03049203,22.93116931,19.66321905,15.60761611,14.51830027,19.61487982,18.67046364,21.13970763,18.61086895,23.14472319,21.37931319,20.92718974,23.21394654,21.69423494,20.66373704,22.52901818,25.1512991,22.39040023,19.93626667,22.5250037,17.94523497,17.96422564,20.64118793,16.06354543,19.53155315,12.7067786,13.66452479,14.04605029,18.75,17.12,23.12,29.22,26.2,20.12,20.5,27.78,26.44,27.9,26.34,29.9,28.24,27.44,31.12,28.66,26.08,28.32,32.12,26.9,25.66,28.9,23.68,26.66,27.1,23.56,26.92,19.56,17.66,21.12,4.510451915,2.611233333,8.491211232,16.62592169,13.48859231,10.20998389,7.39722717,11.30740624,10.28033939,14.88353297,11.06637493,17.84038551,16.08335165,15.09285897,13.79824155,16.97807816,17.82350775,15.44208312,19.90479159,18.95076345,15.1847037,18.39472222,14.5669013,13.26535641,16.95719713,11.4631803,14.39647748,8.173483278,10.92862529,10.79502609,65.9413281,64.42444333,69.71057152,70.37455291,70.91070974,72.7660146,64.5650592,63.70402282,62.1306503,70.29597054,65.80299644,74.21444806,74.90046289,72.10957615,59.65634,77.38256271,84.83353611,67.21877163,74.90160974,81.80256894,76.60266222,79.28974667,82.51162975,77.28365974,81.49809698,76.65781873,76.67221481,76.59429595,84.84306016,82.88076719,NA,NA,NA,NA,NA,NA,NA,NA,NA,NA,NA,NA,NA,NA,NA,NA,NA,NA,NA,NA,NA,NA,NA,NA,NA,NA,NA,NA,NA,NA,1.354666667,0,0.0508,0.3556,0.8128,4.5212,0.0508,0.0508,0.0508,0.1016,0.508,1.1176,1.8288,0.4572,0.254,2.4892,3.6068,0.9652,13.462,3.2512,3.81,1.6764,0.051308,0.3048,4.4704,0,7.7724,0.3048,6.248908,0.1016,3.801224928,3.074660307,2.153595958,2.608076877,2.538237745,4.783943633,5.257174751,2.414147002,3.228806436,2.936367898,3.417015984,2.340428225,3.354004464,2.636898189,3.350998473,2.220516933,2.03010551,3.342516245,3.249732433,2.575070535,2.744213362,2.747961985,2.0420645,1.922252983,2.680293469,3.105298133,1.920268145,3.074972299,2.860264897,2.179266442,8.128,0,0.254,1.778,4.064,22.606,0.254,0.254,0.254,0.508,2.54,5.588,9.144,2.286,1.27,12.446,18.034,4.826,67.31,16.256,19.05,8.382,0.25654,1.524,22.352,0,38.862,1.524,31.24454,0.508,0.5,0,0.2,0.2,0.2,0.4,0.2,0.2,0.2,0.2,0.2,0.4,0.6,0.4,0.2,0.2,0.4,0.2,0.8,0.4,0.2,0.6,0.4,0.2,0.4,0,0.4,0.4,0.6,0.4,27.75,17.8,32.8,62.55,49.25,31.55,27.25,49.7,44.15,57.15,43.35,66.35,57.25,55.5,61.4,61.4,56.95,58.4,73.6,62.9,47,62.9,39.75,44.7,54.8,36.1,53.1,25,20.75,28.65,15.56666667,15.75,15.90333333,16.03666667,16.14666667,16.23,16.29666667,16.32666667,16.33,16.30333333,16.25666667,16.17666667,16.07333333,15.95333333,15.8,15.63333333,15.46,15.27333333,15.07,14.85333333,14.64333333,14.41,14.18333333,13.95333333,13.71,13.48,13.23666667,12.99666667,12.76333333,12.52333333,238.6979167,272.7208333,263.625,265.3875,293.6666667,241.4291667,261.1333333,332.3166667,323.3166667,273.725,302.0375,245.8458333,261.1375,261.925,299.0458333,263.3541667,235.5395833,291.3375,223.9416667,222.9916666,239.0291667,243.2666667,236.225,237.2125,225.4666667,183.0208333,188.8125,207.1916667,103.1791667,148.8416667,828.1666667,887.2,848.8,865,886.6,805.6,856.4,965.2,971.8,887,926,853,871.6,862,933.4,842.6,821.8,918.8,800.6,786.6,800.4,821.6,801.4,783.4,759.4,668.2,656.6,745.2,512.8,569
NYH3_2016,NYH3,2016,42.72543,-76.65603,Loam,43,34,23,3.416666667,5.74,12.1,14.48,14.06,7.86,10.3,12,12.22,12.52,13.76,14.42,16.88,15.12,15.88,16.44,16.76,15.54,20.26,15.92,13.98,14.2,9.78,15.94,8.08,14,8.1,8.6,9.86,6.22,9.75460097,12.67019203,20.90316931,20.28026667,19.22854778,13.71744378,16.91895701,20.18729697,20.3284087,18.33380121,21.71462319,20.64652857,22.5086641,21.81742346,22.4680942,21.37978548,22.39871049,22.76632784,24.60747676,21.68222807,20.36413704,20.4231183,16.34394231,22.22093793,15.59812586,18.99282272,15.05514783,12.9523664,14.07413511,11.74369055,15.51666667,20.22,28.74,26.48,24.88,19.3,23.32,27.68,28.32,25.56,29.46,27.02,29.56,29,29.56,26.74,28.44,29.66,29.56,27,26.34,27.02,23.66,29,23.78,25.44,22.26,18.44,19.12,17.68,3.9582597,6.519711232,12.99108836,14.72906667,13.90186357,6.36556904,10.084977,11.19817273,12.21472174,12.80808616,14.81005217,15.57259524,16.97933333,13.78325693,16.23434483,17.65255048,17.48494514,15.81096154,20.91339049,17.46116862,15.73888889,16.61144297,12.48321474,18.45174713,11.00680172,14.95570605,9.220721739,9.135241998,12.01274483,8.01086057,69.0487843,70.68526152,64.64178624,72.91397,74.6196825,63.25181928,67.90660459,60.2020403,63.23888971,73.45693394,68.27691372,75.89154211,73.77823513,63.91055282,72.08688322,81.09022671,75.50924465,68.66190434,80.99472881,78.61918363,77.03424,80.68642642,80.80942308,81.17811448,77.33896181,80.08931424,71.94689826,79.91190505,88.23440956,79.72999388,NA,NA,NA,NA,NA,NA,NA,NA,NA,NA,NA,NA,NA,NA,NA,NA,NA,NA,NA,NA,NA,NA,NA,NA,NA,NA,NA,NA,NA,NA,1.354666667,0.0508,0,1.1684,4.5212,0.0508,0.0508,0.0508,0.1016,0.508,0.8636,0.8636,1.4224,0.508,2.4892,3.6068,0.9652,11.2268,5.4864,3.81,0.762,0.9652,0.000508,3.9116,0.8636,7.7724,0,2.896108,3.7084,2.0828,4.308917072,1.95193391,2.542466628,3.064397861,3.066600684,5.583563917,3.475219694,3.364276689,2.82310058,3.204125806,2.356375989,2.901636706,2.879431765,3.399125756,2.697366948,2.006076138,3.186725768,2.962378713,2.957319188,2.592876573,3.049083206,2.015896866,2.013003125,2.147738402,2.673127895,2.763822102,2.488611666,3.318896434,2.024198322,3.187799271,8.128,0.254,0,5.842,22.606,0.254,0.254,0.254,0.508,2.54,4.318,4.318,7.112,2.54,12.446,18.034,4.826,56.134,27.432,19.05,3.81,4.826,0.00254,19.558,4.318,38.862,0,14.48054,18.542,10.414,0.5,0.2,0,0.4,0.4,0.2,0.2,0.2,0.2,0.2,0.2,0.4,0.6,0.4,0.2,0.4,0.2,0.4,0.8,0.2,0.4,0.4,0.2,0.4,0.2,0.4,0,0.8,0.4,0.6,18.05,25.55,54.15,53.25,47.35,24.25,37.45,48.35,53.85,45.2,57.5,53.05,64.7,57.25,62.2,57.95,63,61.05,70.9,57.3,51.3,52.75,36.4,61.2,34.45,50.25,33.1,21.9,24.45,19.75,15.66666667,15.84333333,15.99,16.10333333,16.2,16.27333333,16.31666667,16.33333333,16.31666667,16.28,16.21,16.12,16,15.86666667,15.7,15.53333333,15.34666667,15.15666667,14.93666667,14.73,14.50333333,14.27333333,14.04666667,13.80666667,13.57333333,13.33666667,13.09,12.86,12.61333333,12.38,215.3715278,256.6958333,286.0875,264.7875,268.1916667,259.3583333,294.4791667,334.9875,317.425,259.625,293.0041667,233.6375,277.5666667,272.2958333,281.0416667,226.45625,279.1958333,273.4541667,195.3916667,226.8666667,260.5916667,224.9833334,266.1916667,205.6708333,224.3416667,187.9958333,179.0083333,135.8041667,152.8208333,152.5875,766,878.2,882.8,843,827.6,883.6,913,971.4,945,877.2,918.8,821,901.8,879.8,922.2,756.2,908.2,880.8,737,795.4,833.2,796.4,838.8,723.4,751.8,683,657.4,543.4,647,597.6
OHH1_2016,OHH1,2016,39.860536,-83.675091,Loam,46,32,22,18.1,18.22,14.28,16.38,18.04,17.4,15.96,16.62,18.4,19.1,17.8,21.56,19.12,18.56,18.52,21.96,19.34,15.5,19.1,14.8,18.42,13.2,15.9,14.22,10.68,10.14,10.88,6.22,8.3,NA,23.8985873,22.09244139,20.48233333,23.12987179,24.2827381,23.688645,22.12925714,20.59830473,24.20041667,23.69647186,23.59377419,25.65273939,23.36690798,24.06374071,23.82411971,24.96416266,22.81453702,21.15491045,23.98848958,20.08807709,23.74394501,19.17733475,20.27448509,21.63888528,15.73741642,14.80013286,17.084,13.04352941,16.56666667,NA,30.61666667,28.3,26.18,29.6,31.28,30.18,28.28,25.06,29.74,27.96,29.88,30.44,29.12,30.22,29.34,28.04,27.46,26.4,30.66,25.68,29.56,26.02,26.88,29.46,20.66,21.28,23.88,20.44,24.4,NA,17.17882036,17.32710623,12.629,15.5675641,17.27671429,18.21098333,14.32038095,18.23117194,19.01703571,18.8025974,19.24347849,21.86243704,20.26449678,20.11508095,18.7000279,22.51723219,21.00935556,17.58949591,20.5741313,15.32650842,19.96707374,15.2473697,16.84523869,15.59174242,11.9852614,12.35278844,10.70786667,7.201470588,11.84166667,NA,69.50252604,77.87123407,63.74368333,66.08733333,68.53725952,74.2174095,65.29128048,87.78966569,75.1644119,75.63846753,78.43509272,81.21952807,83.88027039,81.59808517,75.35816862,86.46873991,90.62826928,81.63299143,82.81079322,76.13920415,80.87375213,80.20779553,82.88997019,72.32243831,81.00098508,87.27142517,68.34051333,70.42307843,75.26208333,NA,NA,NA,NA,NA,NA,NA,NA,NA,NA,NA,NA,NA,NA,NA,NA,NA,NA,NA,NA,NA,NA,NA,NA,NA,NA,NA,NA,NA,NA,NA,5.630333333,2.1336,0.9652,2.2352,0.0508,1.7272,0.6604,2.4384,0,5.283708,2.1336,2.2352,3.048,0,3.9116,1.4224,5.8928,2.8448,6.706108,0.0508,4.6228,6.8072,1.6764,0,9.4996,1.5748,0,0,0,NA,2.835096801,3.679703009,3.684120555,3.711647506,3.952930536,3.120319675,2.780506112,2.997153521,3.247672723,5.499381291,2.317483771,2.016950215,1.841336564,1.610621129,2.385064731,2.824643902,2.765914176,2.695491633,2.24421935,3.442164474,2.598938195,2.271581446,1.926232417,1.656465139,3.236555196,2.50025424,3.411449645,3.071785473,3.493932167,NA,33.782,10.668,4.826,11.176,0.254,8.636,3.302,12.192,0,26.41854,10.668,11.176,15.24,0,19.558,7.112,29.464,14.224,33.53054,0.254,23.114,34.036,8.382,0,47.498,7.874,0,0,0,0,0.166666667,0.4,0.2,0.2,0.2,0.4,0.4,0.8,0,0.4,0.2,0.2,0.4,0,0.4,0.8,0.8,0.2,0.4,0.2,0.4,0.4,0.4,0,0.6,0.6,0,0,0,0,84,66.3,49.55,63.9,70.1,65.7,59.25,54.2,69.55,66.15,68.35,76.4,69.75,70.55,69.1,73.9,67,54.45,72.15,51.2,69.1,48.05,56.95,58.35,28.9,30.05,39.7,26.4,7.2,0,15.76944444,15.87,15.93666667,15.97333333,15.99333333,15.99333333,15.96333333,15.90333333,15.82333333,15.72666667,15.60666667,15.47333333,15.31666667,15.15,14.98666667,14.79333333,14.6,14.40666667,14.20333333,13.99,13.78,13.57,13.35,13.13,12.92666667,12.70666667,12.49,12.28,12.15,NA,290.5138889,246.1791667,291.5583333,298.9166667,316.3291667,274.6958333,318.0791667,184.5833333,287.0416667,282.5083333,301.9875,240.0208333,227.0125,299.4291667,245.0083333,171.0583333,228.0041667,238.8541667,238.1666667,268.8208333,216.5833333,235.2916667,201.675,213.4625,104.3166667,167.3125,207.9916667,169.8958333,152.0833333,NA,933.5,852,971,957.6,982.4,877.6,993,641.2,900.6,934.2,943.2,821.6,852.4,916.8,863.6,714.8,871.8,878,836.6,876.6,763.2,796.2,719,738.8,537.8,679.2,729.2,665.8,644,NA
ONH1_2016,ONH1,2016,43.497786,-80.451464,Clay Loam,23,46,31,4.5,2,4.6,4.8,9.4,15.6,12,7.6,9.2,13,9.4,12,10.6,16,16.8,11,17.8,16.2,14.6,14.2,19,15.6,14.2,16,11,13.8,11,10.2,10,6.6,9.59984245,9.941729323,10.39285217,12.01287879,18.1931342,20.71167118,17.30386227,13.19879565,16.21821734,21.59551282,18.48885714,19.80133053,19.21557971,21.33232773,22.77309524,19.31630214,24.23135468,21.77580952,21.09607446,21.0621014,24.44460819,19.96902271,19.73274929,20.40643396,18.50262055,19.88514749,15.98202857,15.344125,17.08779156,13.07640193,15,16.2,16,18.6,25,27.2,24.8,19.4,22.8,29.4,26.2,27,26.4,29,29.6,25.8,30.6,28,28.8,28.8,30,27.6,25.6,27,24.2,28.4,24.4,22.2,25.2,18.6,4.529212408,0.739233083,6.526298324,4.487878788,9.902047619,14.76398347,11.90200032,7.178725719,8.663068783,12.09312354,8.461274725,11.78952381,10.70593645,16.37925676,16.27285714,11.18576803,16.98955665,15.51014286,14.87887394,13.8056407,19.74546589,17.36312875,15.24303063,17.16449212,12.56546709,16.13620593,12.64348086,12.6078195,12.28610312,7.8610303,74.87315358,56.20696744,78.79737343,64.01617424,62.54672558,71.69557938,73.55870988,70.30368916,64.22386299,59.442838,56.74216484,64.61112507,62.40517196,76.55930181,69.8423064,63.34809405,67.49636322,69.96959286,71.84471399,66.97815068,77.71863415,86.39897809,77.47091585,83.70890406,71.27467643,81.81656108,82.91168864,85.76494959,77.43135851,73.45710329,NA,NA,NA,NA,NA,NA,NA,NA,NA,NA,NA,NA,NA,NA,NA,NA,NA,NA,NA,NA,NA,NA,NA,NA,NA,NA,NA,NA,NA,NA,0.803333333,0,7.62,0,3.2,0.406,3.454,0.66,1.778,0,0.05,0.05,0.812,0.814,4.776,0,6.044,2.234,0,0.406,4.218,3.202,2.49,6.45,0,3.81,0.204,0.61,0,1.422,3.430551845,4.085933435,5.469381976,1.848101097,2.682700746,3.441381435,3.518153498,4.994867506,4.361565528,3.681782173,2.85791167,3.811893143,3.67622428,3.144333372,4.294384645,3.684847048,3.900161309,3.23475038,2.248631033,3.514942947,3.755693909,2.694746282,3.723746466,2.522603462,2.504699289,2.4133938,2.800305095,2.962008345,1.940607727,3.634224824,4.82,0,38.1,0,16,2.03,17.27,3.3,8.89,0,0.25,0.25,4.06,4.07,23.88,0,30.22,11.17,0,2.03,21.09,16.01,12.45,32.25,0,19.05,1.02,3.05,0,7.11,0.5,0,0.8,0,0.2,0.2,0.6,0.4,0.2,0,0.2,0.2,0.2,0.4,0.6,0,0.4,0.4,0,0.2,0.6,0.4,0.6,0.4,0,0.4,0.2,0.2,0,0.2,15.5,15.5,18.5,21.5,40.5,57,42,25,34.5,54.5,41.5,49,44.5,60.5,62.5,43.5,68.5,60,57,57,69.5,58,49.5,57.5,39.5,56.5,42,35.5,39,21.5,15.25833333,15.48,15.66666667,15.85,15.99333333,16.12333333,16.23333333,16.32,16.37333333,16.40666667,16.40666667,16.38333333,16.32666667,16.24333333,16.13666667,16.01,15.86,15.69,15.51,15.30666667,15.1,14.88,14.66,14.42666667,14.17666667,13.92666667,13.68,13.44,13.19,12.94666667,194.4861111,255.5208334,215.5416667,272.5916667,292.45,304.6,296.35,279.0666667,296.9708333,319.5416667,336.3916667,291.55,317.6041667,268.9,271.4,310.6166667,268.5666667,275.4666667,253.28125,291.4708333,211.4666667,237.9166667,232.675,240.7541667,247.0125,215.5875,205.2333333,182.0791667,178.9625,121.1041667,685.5,840.4,790.8,914.2,904.4,910,927.2,865.6,885,915.2,950.8,887.2,957.2,875.8,866.2,941,856.6,844,871,904.6,743.2,789.8,799.2,784.6,813.6,730.6,746.4,625.2,638.4,497.2
ONH2_2016,ONH2,2016,42.452816,-81.883474,Loam,43,43,14,7.5,7.4,11.8,16.6,15,11.2,13.6,16.8,13.6,14.6,14.4,17.8,19.6,14.8,20.2,17.8,17,16.4,22.4,18.2,15.6,18.2,13.2,17.6,13.8,14.2,14.6,10.2,13.8,13.8,11.96014532,13.17279893,17.64469697,22.19757029,20.38051817,16.68124691,19.57343434,22.58387215,20.54178763,21.44791453,20.43479982,22.57708564,23.77408177,21.14833333,25.48670217,23.27551649,21.98371967,22.58520832,25.67064924,22.26864116,21.36212193,22.47613465,18.87684211,23.10235108,19.27995151,18.90599314,19.92491842,16.22570407,15.86988753,17.84170285,16.16666667,18.4,25.2,27.2,25.4,22.2,25,28,25.2,26.8,25,27.2,28,25.8,30.8,27.4,27.6,27.2,30.2,26.4,26,28.2,24.2,28.4,24.4,23.6,27.4,20.2,19.2,21.8,6.8875905,4.626071226,9.190692641,15.61727503,12.77504188,8.764668721,10.08414141,14.6615205,11.2338172,13.81357939,14.07194997,18.67534699,18.8486833,15.39240143,20.62887832,18.79599479,18.72875811,16.88663919,22.75016925,20.34066433,17.48783436,20.19372386,14.99606516,19.5560095,15.60880974,15.85022119,15.68797598,9.960149383,14.57982308,13.21760236,72.30624314,59.28174389,60.22192532,69.27850049,64.04642435,61.95509965,56.54595131,64.66844644,57.82323683,64.9903598,69.24265051,80.11866462,75.23183403,71.56042545,76.4319198,77.57968164,83.75808317,72.48337782,85.28111167,89.40308429,78.32987946,86.65535072,80.49911579,82.07472072,81.10864185,84.38113367,71.84977498,69.15300925,92.68787913,75.55423279,NA,NA,NA,NA,NA,NA,NA,NA,NA,NA,NA,NA,NA,NA,NA,NA,NA,NA,NA,NA,NA,NA,NA,NA,NA,NA,NA,NA,NA,NA,4.023333333,0.152,0,0.204,1.22,0,0.102,4.622,0.05,0.05,1.778,4.42,2.184,0.812,0.814,2.388,0.812,0.204,3.812,8.688,2.236,4.216,0.102,2.592,2.59,2.844,0,5.588,13.21,0.102,5.949719722,3.570537629,4.285084682,4.312463533,4.769306658,5.33668712,5.333183788,4.315764754,3.152096575,4.739437684,3.544533577,3.744023354,4.675183649,3.205548505,3.77576562,3.349137929,2.442952952,3.28071412,3.625601765,3.112138738,4.008145954,2.793648895,2.97238394,3.26688952,3.090291274,3.224219673,2.268584714,4.312037819,4.19580522,4.326379895,24.14,0.76,0,1.02,6.1,0,0.51,23.11,0.25,0.25,8.89,22.1,10.92,4.06,4.07,11.94,4.06,1.02,19.06,43.44,11.18,21.08,0.51,12.96,12.95,14.22,0,27.94,66.05,0.51,0.833333333,0.4,0,0.2,0.4,0,0.2,0.2,0.2,0.2,0.2,0.4,0.4,0.2,0.6,0.4,0.2,0.2,0.6,0.6,0.4,0.2,0.2,0.4,0.2,0.4,0,0.4,0.8,0.2,22,22,45.5,59.5,51,36,45,60.5,47,52.5,48.5,62.5,69,51.5,74.5,63,61.5,59,79,61.5,54,66,43.5,64.5,45.5,44.5,55,27,32.5,40,15.56111111,15.73666667,15.89,16.01333333,16.12,16.2,16.25333333,16.29,16.28,16.26333333,16.20333333,16.12666667,16.02666667,15.89666667,15.76,15.6,15.42666667,15.22333333,15.02666667,14.82,14.60333333,14.37666667,14.15,13.9,13.65666667,13.42666667,13.19333333,12.94666667,12.72,12.47666667,240.7777778,275.175,338.0208333,289.8,297.0583333,309.4333334,296.5041667,287.8958333,306.6041667,316.8416667,284.7041667,269.0083333,293.5291667,287.825,269.4708333,266.8625,281.7625,293.7333333,193.8291667,234.3083333,254.5833334,231.1541667,234.6375,216.625,209.3666667,181.6125,189.2125,142.6625,107.6541667,191.0083333,833,872.4,970,884.4,920.2,947.8,904.8,838.2,941.2,928.6,907.8,859.8,910.2,866.6,851.6,809.4,878.2,914,721,786.6,852.2,832.8,799.8,750.2,788.8,633,691.6,617.6,484.6,681.6
TXH1_2016,TXH1,2016,30.546919,-96.434358,100% Clay,19.61,17.19,63.19,13.43333333,14.98,16.12,8.7,10.66,12.66,11.32,17.12,16.4,15.9,18.4,18.24,14.56,20.76,18.8,18.66,20.46,21.42,21.22,23.32,25.02,24.2,24.12,23.68,26.24,25.46,24.88,24.64,24.58,24.2,17.90628634,19.06076918,19.75359036,14.35766245,16.50211123,17.94905745,18.68867647,19.89842424,19.50060018,20.71887534,23.03550741,21.79992776,21.62553333,25.04596459,21.53515818,21.83363173,23.61192606,24.63214395,25.1347807,27.56173717,28.62391811,28.33659462,28.81574713,28.07312587,29.78545842,29.38166667,29.46109203,30.09788462,28.8254535,29.05760959,24.21666667,25.22,25,20.46,22.44,23.66,27,23.78,24.32,26.34,28.66,26.34,27.88,30.44,26,26.8,28.78,29.8,29.78,32.66,34.3,33.88,34,34.2,35.12,35.46,36.14,35.78,34.9,35.58,13.16341022,14.69071347,14.51317751,6.519603953,10.73180289,10.71128511,8.199901961,16.61410606,17.44757008,16.15834011,18.95502457,16.88500046,12.80026667,19.91952076,18.90317435,19.63009111,21.51854078,21.43548823,20.1123362,22.2127158,23.90817061,22.85112012,22.63640805,22.80305444,23.74877035,23.3776749,23.03930632,22.42282051,23.09347937,23.04925381,77.69360891,79.64063355,73.89803713,62.31806947,71.95524356,67.3082478,55.96386424,83.19868687,88.77880263,78.57284135,79.5611486,75.24497827,60.60967333,74.50983303,85.87837747,88.47511101,89.14223664,83.8269332,76.23376396,74.88472151,77.64562216,74.10071905,71.8820967,75.61916237,71.98754417,72.94360526,71.47676007,66.85454487,73.93085112,73.15667142,NA,NA,NA,NA,NA,NA,NA,NA,NA,NA,NA,NA,NA,NA,NA,NA,NA,NA,NA,NA,NA,NA,NA,NA,NA,NA,NA,NA,NA,NA,8.128,10.0076,0,2.7432,0,0.4572,0,4.1656,9.0424,7.7724,3.048,3.099308,0.0508,0.5588,3.4544,19.7104,43.4848,2.2352,1.8288,0.254,0,0.1016,0.4572,8.1788,0,0,0,0,1.2192,0,5.18247221,3.836052095,4.543906936,5.700251669,3.054678346,4.459882869,2.892662036,4.52157303,3.862867125,2.534532294,5.00941425,5.253190411,3.23842498,3.978669067,3.35630009,3.368068589,4.806969683,2.758602136,2.959277867,2.838667909,3.957656196,2.803781986,2.925070575,2.756031658,5.658317872,5.029904311,4.087215181,2.612781931,3.266566644,3.317089382,48.768,50.038,0,13.716,0,2.286,0,20.828,45.212,38.862,15.24,15.49654,0.254,2.794,17.272,98.552,217.424,11.176,9.144,1.27,0,0.508,2.286,40.894,0,0,0,0,6.096,0,0.333333333,0.6,0,0.2,0,0.2,0,0.4,0.4,0.4,0.4,0.4,0.2,0.2,0.8,0.4,0.4,0.4,0.4,0.2,0,0.2,0.2,0.2,0,0,0,0,0.4,0,54.05,49.95,53.35,30.15,35.25,44.45,46.35,52.25,51.8,55.6,67.05,61.45,56.1,76.6,62,63.35,70.85,76.6,75.55,83.3,87.55,85.5,85.3,84.2,90.6,88.65,87.2,86.6,86.45,85.5,12.725,12.89666667,13.05333333,13.20666667,13.36333333,13.51333333,13.66666667,13.81666667,13.97,14.10666667,14.24333333,14.38333333,14.51,14.62333333,14.73666667,14.83333333,14.92,14.99333333,15.05666667,15.09666667,15.12,15.12666667,15.12333333,15.09666667,15.05666667,14.99666667,14.92666667,14.84333333,14.74333333,14.63666667,163.1701389,193.975,209.3583333,247.6,225.6416667,229.1125,291.2416667,125.0125,152.9416667,263.5958333,259.325,246.8875,293.6166667,265.3666667,185.3958333,189.2291667,172.4333333,241.4916667,253.8416667,288.9041667,323.0291667,314.0541667,295.9041667,286.5791667,315.775,310.7625,311.45,304.7958333,262.8083333,273.6625,679.8333333,842.2,815.2,859.6,811.2,832.6,982.8,557.6,686.8,932,918,902.6,947,935.8,771.8,844.6,670.2,930,908.4,917.4,990.6,985.6,918.2,963.4,971.2,970.8,978.4,974.6,908.2,957.6
WIH1_2016,WIH1,2016,43.055814,-89.531719,"99.8% Silt Loam, 0.2% Loam",19,54,27,7.083333333,3.9,9.8,16.9,14.04,12.66,15.76,16.24,17.24,17.08,12.44,17.98,19.46,16,19.98,19.56,16.88,18.34,19.98,17.84,15.38,16.86,16.92,15.06,15.02,14.54,14.22,15.56,11.14,11.12,10.9267794,11.51473333,18.6825,21.34840154,19.59087619,17.64790281,20.94995584,21.07873607,22.78490476,22.34009336,18.65097619,22.48581871,24.0087,21.0429377,25.00139744,24.56232045,21.78150651,23.10048649,24.28858333,22.97066449,20.3083877,21.06778013,20.90664306,21.06524929,19.68961835,19.00374835,19.38194892,18.31581581,13.6715,15.75580767,14.71666667,18.02,25.9,27.22,25.78,23.02,27.12,27.78,27.24,27.9,24.34,27.66,28.78,26.54,30.68,29.54,26.64,28.24,28.46,27.62,25.22,25.46,26.22,26.44,23.78,23.88,25.22,21.9,17.56,20.9,6.92348654,1.494166667,7.8425,16.30448649,13.1407619,10.48839983,14.1894,15.70155596,14.87484639,15.58479203,11.83110073,17.85021372,18.26503333,15.3233922,21.03532582,19.38661036,17.03591894,18.30014324,19.90616667,18.36858026,16.34761033,17.03728182,17.30271804,15.57678063,16.33208108,14.73511481,14.86565591,14.66318663,10.54470833,12.93591503,78.22080886,54.36225,53.01283333,74.79596757,69.82718571,65.21279667,67.26749333,74.3714373,64.06586319,67.92042741,67.60207217,76.52688025,71.24512,72.42722251,80.05953827,74.55695026,76.0186637,76.15925919,78.03425,77.1428303,79.63403741,79.26597893,81.15373361,72.35855992,82.68751939,77.74670431,78.23836473,80.9953275,82.88012732,84.20797267,NA,NA,NA,NA,NA,NA,NA,NA,NA,NA,NA,NA,NA,NA,NA,NA,NA,NA,NA,NA,NA,NA,NA,NA,NA,NA,NA,NA,NA,NA,5.842,0.1016,0,3.3528,5.08,0.8636,3.81,7.5184,0.3048,8.2804,1.9812,3.1496,0.1016,1.8796,7.4676,0,0.7112,8.1788,5.588,2.286,15.8496,7.4168,0.6604,0.4064,15.189708,6.7564,16.9672,2.438908,1.372108,0.3048,4.017377453,2.411199028,2.1220815,3.340732311,2.340395018,3.155652114,3.139469987,2.658358771,2.977719169,3.273699602,2.21204095,2.713438128,3.998008873,3.028787267,2.992664599,2.411777253,2.429490422,2.502542271,2.436182703,2.02383149,2.550530234,2.971220753,2.194011777,3.307139545,2.527852439,3.416781382,2.279397326,3.233017741,4.129143979,2.677932356,35.052,0.508,0,16.764,25.4,4.318,19.05,37.592,1.524,41.402,9.906,15.748,0.508,9.398,37.338,0,3.556,40.894,27.94,11.43,79.248,37.084,3.302,2.032,75.94854,33.782,84.836,12.19454,6.86054,1.524,0.833333333,0.2,0,1,0.4,0.2,0.8,0.4,0.2,0.2,0.2,0.4,0.4,0.4,0.4,0,0.2,0.2,0.4,0.4,0.6,0.4,0.2,0.2,0.6,0.6,0.4,0.6,0.8,0.2,15.85,20.05,43.95,60.3,49.55,40.3,55.8,59.75,61.2,61.35,41.95,64.1,69.5,56.35,73.85,71.65,58.8,65.6,71.1,63.65,51.5,55.8,57.85,53.45,47,46.05,48.6,43.65,22.85,31.45,15.56111111,15.75,15.91333333,16.05333333,16.16333333,16.26333333,16.32,16.35666667,16.37,16.35333333,16.30666667,16.23,16.13333333,16.01,15.86333333,15.7,15.52333333,15.34,15.13333333,14.92,14.70333333,14.47333333,14.24666667,14.00333333,13.77333333,13.52666667,13.29,13.04333333,12.80666667,12.56,167.9826389,308.5625,291.0833333,257.7875,297.6208333,283.7416667,260.6916667,290.3875,283.8625,324.9625,324.5708334,247.25,285.3291667,267.1833333,210.0916667,253.3333333,223.3520833,280.3791667,205.55,259.7125,225.825,186.3041667,221.0916667,191.1416667,202.2333333,172.5666666,154.6625,138.1125,99.48749999,139.3625,642.8333333,950.8,859.2,866.4,873,896.8,882.4,872.4,932.2,968.8,963.6,857.4,885.6,817.2,752,831.6,774.6,869.8,757.6,841.8,785.2,689.4,787,709.2,732.4,648,676.2,544.4,466,626.6
WIH2_2016,WIH2,2016,43.325958,-89.340114,"99.1% Silt Loam, 0.9% Loam",23,51,26,16.68333333,14.04,12.66,15.76,16.24,17.24,17.08,12.44,17.98,19.46,16,19.98,19.56,16.88,18.34,19.98,17.84,15.38,16.86,16.92,15.06,15.02,14.54,14.22,15.56,11.14,11.12,6.88,7.56,8.44,21.34380684,19.59087619,17.64790281,20.94995584,21.07873607,22.78490476,22.34009336,18.65097619,22.48581871,24.0087,21.0429377,25.00139744,24.56232045,21.78150651,23.10048649,24.28858333,22.97066449,20.3083877,21.06778013,20.90664306,21.06524929,19.68961835,19.00374835,19.38194892,18.31581581,13.6715,15.75580767,12.91689394,12.20600992,13.2233493,27.21666667,25.78,23.02,27.12,27.78,27.24,27.9,24.34,27.66,28.78,26.54,30.68,29.54,26.64,28.24,28.46,27.62,25.22,25.46,26.22,26.44,23.78,23.88,25.22,21.9,17.56,20.9,19.46,16.9,18.02,15.72804429,13.1407619,10.48839983,14.1894,15.70155596,14.87484639,15.58479203,11.83110073,17.85021372,18.26503333,15.3233922,21.03532582,19.38661036,17.03591894,18.30014324,19.90616667,18.36858026,16.34761033,17.03728182,17.30271804,15.57678063,16.33208108,14.73511481,14.86565591,14.66318663,10.54470833,12.93591503,6.867045455,8.864829365,8.089969233,72.18691742,69.82718571,65.21279667,67.26749333,74.3714373,64.06586319,67.92042741,67.60207217,76.52688025,71.24512,72.42722251,80.05953827,74.55695026,76.0186637,76.15925919,78.03425,77.1428303,79.63403741,79.26597893,81.15373361,72.35855992,82.68751939,77.74670431,78.23836473,80.9953275,82.88012732,84.20797267,69.08759256,81.79593611,72.7700703,NA,NA,NA,NA,NA,NA,NA,NA,NA,NA,NA,NA,NA,NA,NA,NA,NA,NA,NA,NA,NA,NA,NA,NA,NA,NA,NA,NA,NA,NA,2.794,5.08,0.8636,3.81,7.5184,0.3048,8.2804,1.9812,3.1496,0.1016,1.8796,7.4676,0,0.7112,8.1788,5.588,2.286,15.8496,7.4168,0.6604,0.4064,15.189708,6.7564,16.9672,2.438908,1.372108,0.3048,1.778,10.668,0,3.169776593,2.340395018,3.155652114,3.139469987,2.658358771,2.977719169,3.273699602,2.21204095,2.713438128,3.998008873,3.028787267,2.992664599,2.411777253,2.429490422,2.502542271,2.436182703,2.02383149,2.550530234,2.971220753,2.194011777,3.307139545,2.527852439,3.416781382,2.279397326,3.233017741,4.129143979,2.677932356,3.295284662,2.770980505,3.143682589,16.764,25.4,4.318,19.05,37.592,1.524,41.402,9.906,15.748,0.508,9.398,37.338,0,3.556,40.894,27.94,11.43,79.248,37.084,3.302,2.032,75.94854,33.782,84.836,12.19454,6.86054,1.524,8.89,53.34,0,0.833333333,0.4,0.2,0.8,0.4,0.2,0.2,0.2,0.4,0.4,0.4,0.4,0,0.2,0.2,0.4,0.4,0.6,0.4,0.2,0.2,0.6,0.6,0.4,0.6,0.8,0.2,0.2,0.6,0,71.7,49.55,40.3,55.8,59.75,61.2,61.35,41.95,64.1,69.5,56.35,73.85,71.65,58.8,65.6,71.1,63.65,51.5,55.8,57.85,53.45,47,46.05,48.6,43.65,22.85,31.45,25.85,21.4,24.2,16.03888889,16.16333333,16.26333333,16.32,16.35666667,16.37,16.35333333,16.30666667,16.23,16.13333333,16.01,15.86333333,15.7,15.52333333,15.34,15.13333333,14.92,14.70333333,14.47333333,14.24666667,14.00333333,13.77333333,13.52666667,13.29,13.04333333,12.80666667,12.56,12.32,12.08333333,11.85,253.21875,297.6208333,283.7416667,260.6916667,290.3875,283.8625,324.9625,324.5708334,247.25,285.3291667,267.1833333,210.0916667,253.3333333,223.3520833,280.3791667,205.55,259.7125,225.825,186.3041667,221.0916667,191.1416667,202.2333333,172.5666666,154.6625,138.1125,99.48749999,139.3625,145,110.0791667,131.1416667,843.1666667,873,896.8,882.4,872.4,932.2,968.8,963.6,857.4,885.6,817.2,752,831.6,774.6,869.8,757.6,841.8,785.2,689.4,787,709.2,732.4,648,676.2,544.4,466,626.6,562.6,474.8,558.2
